# Supplementary material for: A continuous flow electrochemical reactor using readily available metal wires and carbon fibers as electrodes: environmentally benign halogenations of alkenes, alkynes, and aromatics
Source: Royal Society of Chemistry journal article supplement (doi:10.1039/d4gc01503g), 2024-01-01
Supplement: d4gc01503g1.pdf [file d4gc01503g1.pdf]

## *Supporting Information*

# **Continuous Flow Electrochemical Reactor using Readily Available Metal Wires and Carbon Fibers: Environmentally Benign Halogenations Of Alkenes, Alkynes And Aromatics**

Yinqing Xie, Long Lin, Bo Xu\*

Key Laboratory of Science and Technology of Eco-Textiles, Ministry of Education, College of Chemistry and Chemical Engineering, Donghua University, Shanghai 201620, P. R. China

### **Table of contents**

|                                                                          |    |
|--------------------------------------------------------------------------|----|
| 1. General .....                                                         | 1  |
| 2. Preparation of electrochemical flow reactors .....                    | 1  |
| 2.1 Preparation of platinum wire-based electrochemical flow reactor..... | 1  |
| 2.2 Preparation of carbon fibers-based electrochemical flow reactor..... | 2  |
| 3. Synthesis of alkene starting materials .....                          | 3  |
| 4. Optimization of halogenation conditions .....                         | 3  |
| 5. General pocedure for the halogenations.....                           | 5  |
| 6. Investigation on the Z/E selectivity of the debrominations.....       | 9  |
| 7. Investigation of current efficiency .....                             | 10 |
| 8. The characterization data of compounds .....                          | 11 |
| 9. Copies of NMR spectra .....                                           | 23 |
| 10. References .....                                                     | 69 |

## 1. General

$^1\text{H}$  NMR (400 MHz, 600 MHz),  $^{13}\text{C}$  NMR (100 MHz, 150 MHz), and  $^{19}\text{F}$  NMR (376 MHz, 564 MHz) spectra were recorded on a Bruker NMR apparatus. The chemical shifts are reported in  $\delta$  (ppm) values ( $^1\text{H}$  and  $^{13}\text{C}$  NMR relative to  $\text{CHCl}_3$ ,  $\delta$  7.26 ppm for  $^1\text{H}$  NMR, and  $\delta$  77.0 ppm for  $^{13}\text{C}$  NMR). Alternatively,  $^1\text{H}$  NMR chemical shifts were referenced to tetramethylsilane signal (0 ppm). Multiplicities are recorded by s (singlet), d (doublet), t (triplet), q (quartet), p (pentet), m (multiplet), and br (broad). Coupling constants ( $J$ ) are reported in Hertz (Hz). TLC was developed on silica gel 60 F254 glass plates. The products were purified using a commercial flash chromatography system or a regular glass column. GC analyses were performed using a Shimadzu GC-2010 ultra gas chromatography-mass spectrometry instrument equipped with a Shimadzu AOC-20s autosampler. All reactions were carried out under an ambient atmosphere without protection. Commercial reagents and solvents were obtained from commercial providers and used without further purification. Electrolysis experiments were performed using an IKA ElectraSyn 2.0 purchased from an IKA China agent or a DC power supply (Henghui PLD-7505). A Vapourtec Easy-Scholar setup was used for the flow experiments.

## 2. Preparation of electrochemical flow reactors

### 2.1 Preparation of platinum wire-based electrochemical flow reactor.

**Materials (Figure S1).** Platinum wires (0.5 mm diameter) as electrodes, the Teflon tubing (2 x 3.175 mm, 20 cm) as the flow channel, a porous polytetrafluoroethylene (PTFE) tube (0.5 x 1.5 mm) as a spacer, PTFE three-way adapters (T-type) for flow of liquids and electronic connection of electrodes (platinum wires), the heat-shrinkable tubes (0.5 mm, 1 mm, 1.5 mm) and inverted cone press rings and threaded adapters as the sealing means.

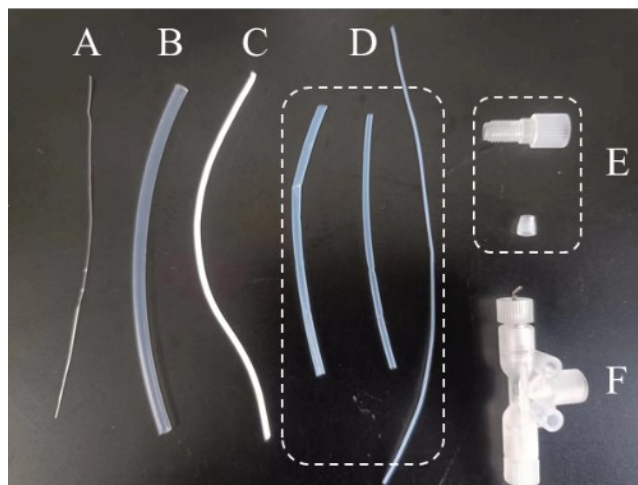

**Figure S1.** Materials required.

### Preparation.

Step 1) One platinum wire (A) was inserted into the porous PTFE tube (C) (**Figure S2**).

Step 2) One unwrapped platinum and one porous PTFE tube-wrapped platinum wire were inserted into the Teflon tube (B).

Step 3) One end of the electrode passes through the three-way adapter (F), and three heat-shrinkable tubes (D) were used in conjunction with inverted cone press rings and threaded adapters (E) to ensure

tightness. The same goes for the electrode encased in a PTFE tube.

Step 4) The Teflon tube was connected to the other side of the three-way adapter (F) (sealed using inverted cone press rings and threaded adapters), which gave the final setup (Figure S3).

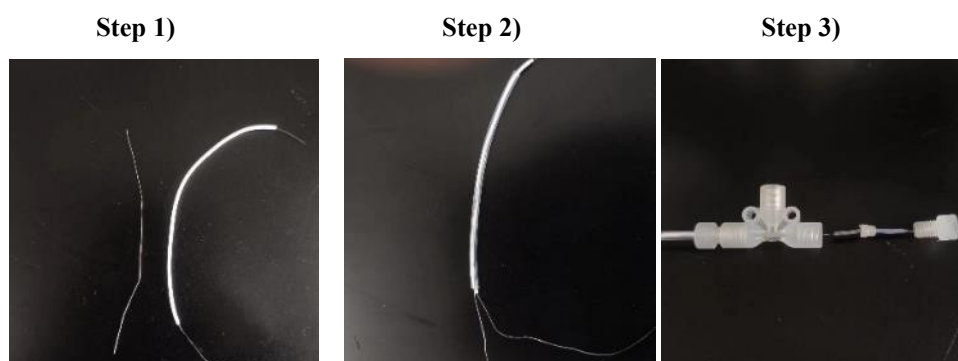

Figure S2. Preparation steps of the metal wires reactor

Step 4)

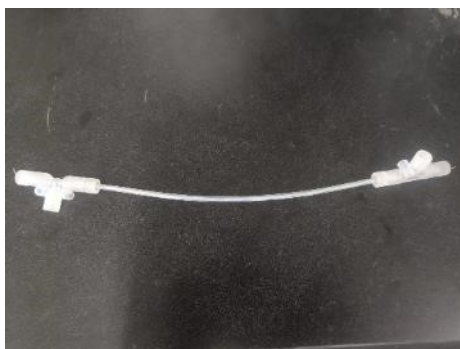

Figure S3. Final flow reactor setup.

## 2.2 Preparation of carbon fibers-based electrochemical flow reactor.

**Materials (Figure S4).** Carbon fibers (1 mm, containing 6,000 filaments with a diameter of 7  $\mu\text{m}$ ) as electrodes, the Teflon tubing (4 x 6 mm, 100 cm) as the flow channel, a PTFE tube (2 x 3 mm) as a spacer, PP plastic three-way adapters (T-type) for flow of liquids and electronic connection of electrodes (platinum wires), photosensitive adhesive and another Teflon tubing (2 x 3.175 mm, 4 cm) as the sealing method.

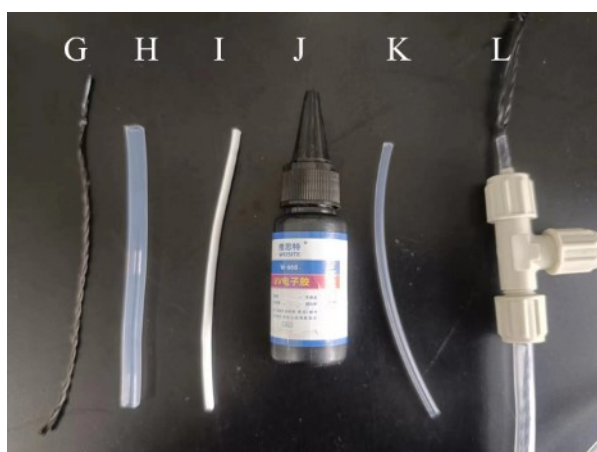

**Figure S4.** Materials required.

**Preparation.**

Step 1) Four carbon fiber wires (**G**) were divided into two groups as electrodes; one group was inserted into the porous PTFE tube (**I**) (**Figure S5**).

Step 2) One unwrapped group and the PTFE tube-wrapped carbon fibers were inserted into the Teflon tube (**H**).

Step 3) One end of the electrode passes through the three-way adapter (**L**); the exposed end is passed through another Teflon tube (**K**) and injected with photosensitive adhesive (**J**) for light solidification to ensure sealing. The same goes for the electrode encased in a PTFE tube.

Step 4) The Teflon tube was connected to the other side of the three-way adapter (**L**) (the tiny gap between the sealing pipeline and the three-way adapter was also sealed with photosensitive adhesive), which gave the final setup (**Figure S6**).

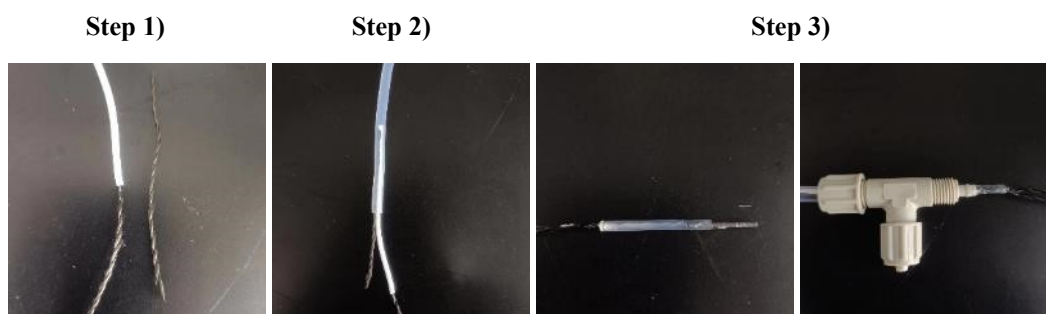

**Figure S5.** Preparation steps of the carbon wires reactor

**Step 4)**

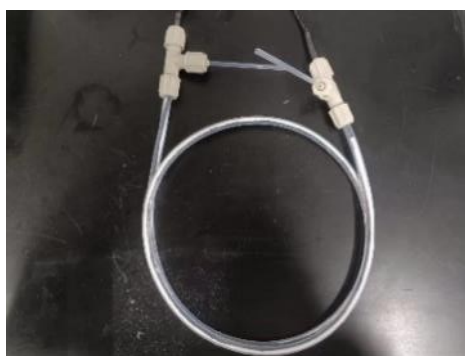

**Figure S6.** Finished flow reactor setup.

### 3. Synthesis of alkene starting materials

All the ynamide precursors used in the present study were prepared following a known procedure.

The following paragraphs list the characterization data for the new compounds (**1k-1m<sup>1</sup>**, **1o-1x** and **2z-2ab<sup>2</sup>**, **2ac-2ae<sup>3</sup>**).

#### 4. Optimization of halogenation conditions

**Table S1.** Optimization for Dibromination of Alkenes<sup>a</sup>

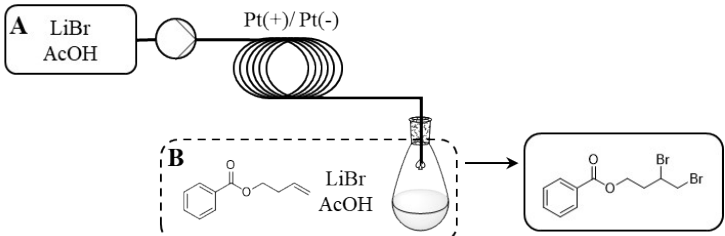

| Entry    | A-LiBr        | B-LiBr          | Electricity | Flow rate                        | yield <sup>b</sup> |
|----------|---------------|-----------------|-------------|----------------------------------|--------------------|
| 1        | 4 mmol        | -               | 16 mA       | 200 $\mu$ L/min                  | 76%                |
| 2        | 5 mmol        | -               | 3 V         | 200 $\mu$ L/min                  | 70%                |
| 3        | 1 mmol        | -               | 10 V        | 100 $\mu$ L/min                  | 70%                |
| 4        | 1 mmol        | -               | 8 V         | 100 $\mu$ L/min                  | 71%                |
| 5        | 2 mmol        | -               | 8 V         | 100 $\mu$ L/min                  | 71%                |
| 6        | 1 mmol        | 0.4 mmol        | 8 V         | 100 $\mu$ L/min                  | 89%                |
| 7        | 1 mmol        | 0.8 mmol        | 8 V         | 100 $\mu$ L/min                  | 90%                |
| <b>8</b> | <b>1 mmol</b> | <b>0.4 mmol</b> | <b>6 V</b>  | <b>100 <math>\mu</math>L/min</b> | <b>97%</b>         |
| 9        | 1 mmol        | 0.4 mmol        | 4 V         | 100 $\mu$ L/min                  | 80%                |
| 10       | 1 mmol        | 0.4 mmol        | 10 V        | 100 $\mu$ L/min                  | 90%                |
| 11       | 1 mmol        | 0.4 mmol        | 8 V         | 200 $\mu$ L/min                  | 90%                |
| 12       | 1 mmol        | 0.4 mmol        | 8 V         | 300 $\mu$ L/min                  | 71%                |
| 13       | 1 mmol        | 0.4 mmol        | 8 V         | 400 $\mu$ L/min                  | 65%                |

[a] Reaction conditions: Undivided cell, Solution A: LiBr (0.5 M), AcOH; Solution B: But-3-en-1-yl benzoate (0.2 mmol/ 0.25M), LiBr, AcOH (0.8 ml); Pt (+)/Pt (-), rt.; [b] Isolated yield.

**Table S2.** Optimization for bromination and iodination of alkynes

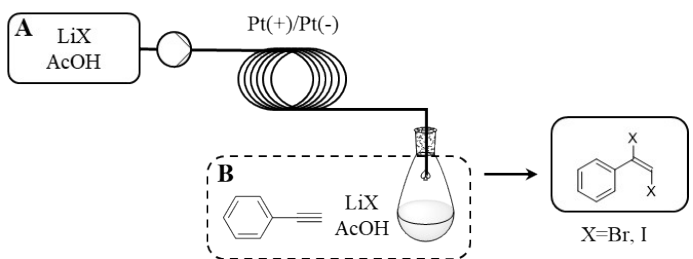

| Entry | A-LiX    | Electricity | Flow            | Yield <sup>b</sup> | LiX  |
|-------|----------|-------------|-----------------|--------------------|------|
| 1     | 4 mmol   | 30 mA       | 300 $\mu$ L/min | 78% <sup>d</sup>   | LiBr |
| 2     | 3.5 mmol | 30 mA       | 300 $\mu$ L/min | 67% <sup>d</sup>   | LiBr |
| 3     | 3 mmol   | 30 mA       | 300 $\mu$ L/min | 58% <sup>d</sup>   | LiBr |
| 4     | 5 mmol   | 30 mA       | 300 $\mu$ L/min | 48% <sup>d</sup>   | LiBr |
| 5     | 2 mmol   | 8 V         | 100 $\mu$ L/min | 69% <sup>d</sup>   | LiBr |

|          |               |             |                                  |                        |             |
|----------|---------------|-------------|----------------------------------|------------------------|-------------|
| <b>6</b> | <b>1 mmol</b> | <b>8 V</b>  | <b>100 <math>\mu</math>L/min</b> | <b>90%<sup>d</sup></b> | <b>LiBr</b> |
| 1        | 1 mmol        | 8 V         | 100 $\mu$ L/min                  | 61%                    | LiI         |
| 2        | 2 mmol        | 8 V         | 100 $\mu$ L/min                  | 71%                    | LiI         |
| <b>3</b> | <b>1 mmol</b> | <b>16 V</b> | <b>100 <math>\mu</math>L/min</b> | <b>77%</b>             | <b>LiI</b>  |
| 4        | 1 mmol        | 20 V        | 100 $\mu$ L/min                  | 71%                    | LiI         |
| 5        | 1 mmol        | 24V         | 100 $\mu$ L/min                  | 71%                    | LiI         |

[c] Reaction conditions: Undivided cell, Solution A: LiX (0.5 M), AcOH; Solution B: Phenylacetylene (0.2 mmol/ 0.25M), LiX (0.4 mmol), AcOH (0.8 ml); Pt (+)/Pt (-), rt.; [d] Products are cis-trans isomeric mixtures of dibromination; [b] Isolated yield.

**Table S3.** Optimization for Chlorination and Bromination of Aromatic ring<sup>e</sup>

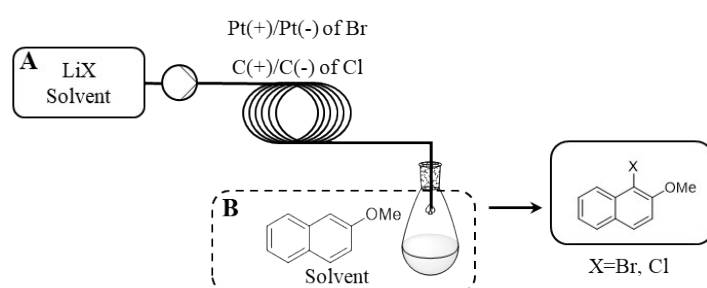

| Entry          | A-LiBr        | Solvent                       | Electricity | Flow                             | Yield <sup>b</sup> | LiX         |
|----------------|---------------|-------------------------------|-------------|----------------------------------|--------------------|-------------|
| 1              | 2 mmol        | AcOH                          | 8 V         | 100 $\mu$ L/min                  | 30%                | LiCl        |
| 2              | 2 mmol        | AcOH                          | 16 V        | 200 $\mu$ L/min                  | 67%                | LiCl        |
| 3              | 2 mmol        | MeCN/ AcOH<br>(9:1)           | 8 V         | 200 $\mu$ L/min                  | 10%                | LiCl        |
| 4              | 2 mmol        | AcOH/ CHCl <sub>3</sub> (1:1) | 8 V         | 200 $\mu$ L/min                  | NR.                | LiCl        |
| 5 <sup>f</sup> | 2 mmol        | AcOH                          | 8 V         | 200 $\mu$ L/min                  | 50%                | LiCl        |
| 6              | 2 mmol        | AcOH                          | 8 V         | 200 $\mu$ L/min                  | 79%                | LiCl        |
| 7              | 1 mmol        | AcOH                          | 8 V         | 200 $\mu$ L/min                  | 45%                | LiCl        |
| 8              | 2.5 mmol      | AcOH                          | 8 V         | 200 $\mu$ L/min                  | 96%                | LiCl        |
| 9 <sup>g</sup> | 2 mmol        | AcOH                          | 8 V         | 200 $\mu$ L/min                  | 41%                | LiCl        |
| <b>10</b>      | <b>3 mmol</b> | <b>AcOH</b>                   | <b>8 V</b>  | <b>200 <math>\mu</math>L/min</b> | <b>98%</b>         | <b>LiCl</b> |
| 11             | 4 mmol        | AcOH                          | 16 mA       | 300 $\mu$ L/min                  | 80%                | LiBr        |
| 12             | 2 mmol        | AcOH                          | 16 mA       | 100 $\mu$ L/min                  | 98%                | LiBr        |
| 13             | 1 mmol        | AcOH                          | 16 mA       | 100 $\mu$ L/min                  | 98%                | LiBr        |
| <b>14</b>      | <b>1mmol</b>  | <b>AcOH</b>                   | <b>8 V</b>  | <b>100 <math>\mu</math>L/min</b> | <b>100%</b>        | <b>LiBr</b> |

[e] Reaction conditions: Undivided cell, Solution A: LiX (0.5 M), Solvent; Solution B: 2-Methoxynaphthalene (0.2 mmol/ 0.25M), Solvent (0.8 ml); rt, C (+)/C (-), rt.; [f] Extre DMSO (20% mmol) add to B; [g] Solution B reacted at 45°C; [b] Isolated yield.

## 5. General procedure for the halogenations

### Continuous Flow Electrochemical Halogenation Experiments.

For continuous flow electrochemical experiments, a general procedure is shown in **Figure S7** and the detailed experimental setup is shown in **Figure S8**.

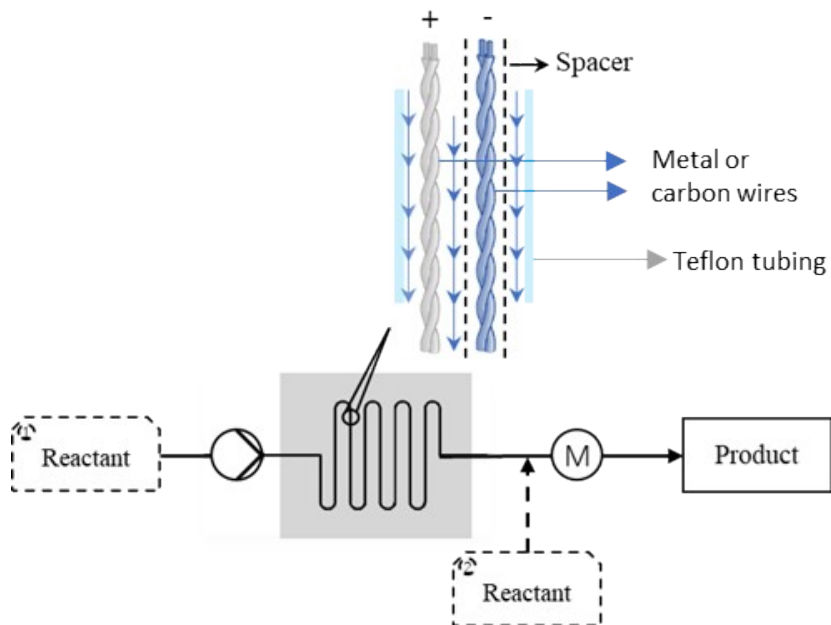

**Figure S7.** General setup

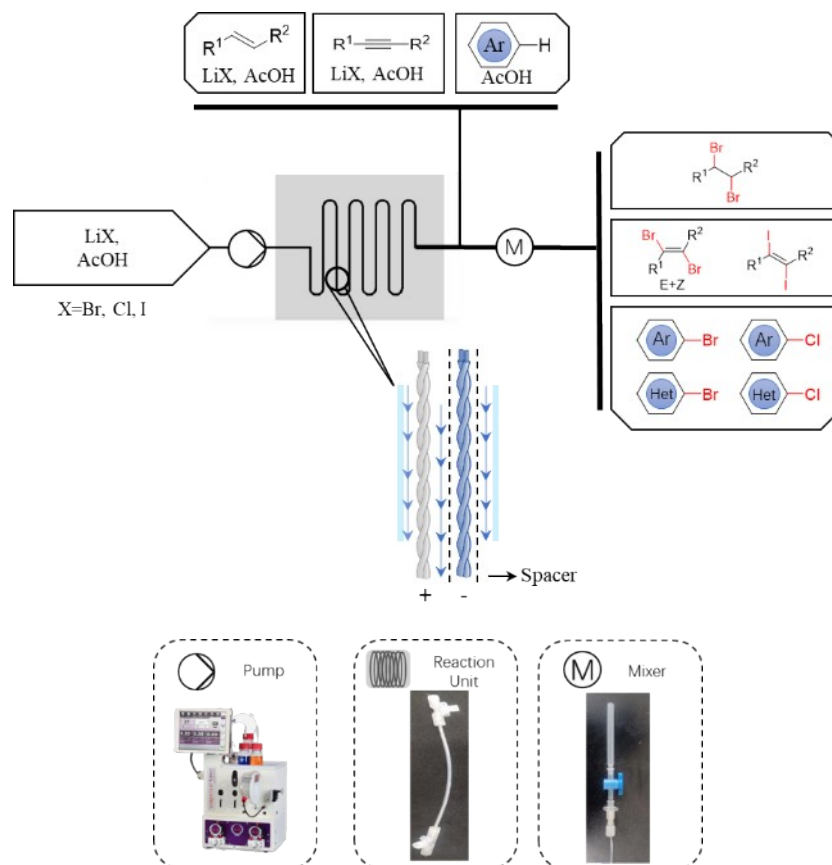

**Figure S8.** Description of the 2-feed continuous flow reactor

### Small-scale flow electrochemical reaction for debromination

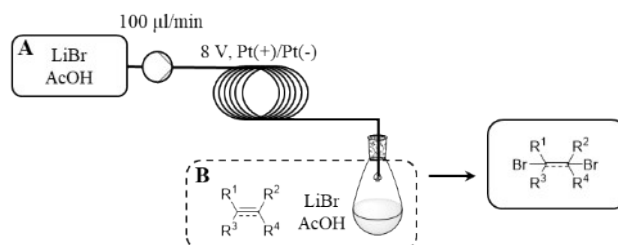

**Solution A:** The solution of lithium bromide (1 mmol, 0.5 M) dissolved in AcOH (2 ml) at a flow rate of 100 µl/min into the platinum electrodes reactor at a constant voltage of 8 V. **Solution B:** The solution of alkene or alkyne (0.2 mmol, 0.25 M), lithium bromide (0.4 mmol) dissolved in AcOH (0.8 ml). The solution from Solution A passed through the reactor and dripped into the flask of Solution B. After Solution A's solution ran out, the product in the flask was collected. The slightly modified conditions were given in each case. Upon completion, the reaction mixture was diluted with EtOAc and washed with water and a saturated Na<sub>2</sub>CO<sub>3</sub> solution. The organic layer was dried over Na<sub>2</sub>SO<sub>4</sub> and concentrated to dryness. The residue was purified by flash chromatography on silica gel (*n*-hexane/ethyl acetate).

### Small-scale flow electrochemical reaction for debromination (premixed mode)

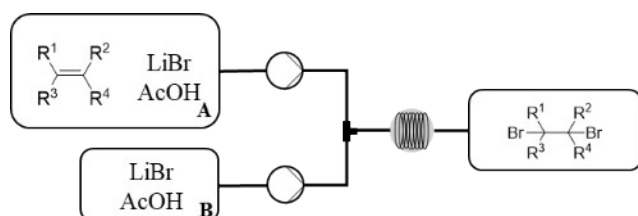

**Solution A:** The solution of alkene or alkyne (0.2 mmol, 0.25 M) and lithium bromide (0.4 mmol) dissolved in AcOH (0.8 ml) at a flow rate of 100 µl/min. **Solution B:** The solution of lithium bromide (1 mmol, 0.5 M) dissolved in AcOH (2 mL) at a flow rate of 100 µl/min. Solution B first fills into the platinum electrodes reactor at a constant voltage of 6 V. Then, Solution A flows through the device and reacts. After the solution ran out, the product in the flask was collected. The slightly modified conditions were given in each case. Upon completion, the reaction mixture was diluted with EtOAc and washed with water and a saturated Na<sub>2</sub>CO<sub>3</sub> solution. The organic layer was dried over Na<sub>2</sub>SO<sub>4</sub> and concentrated to dryness. The residue was purified by flash chromatography on silica gel (*n*-hexane/ethyl acetate).

### Small-scale flow electrochemical reaction for diiodination



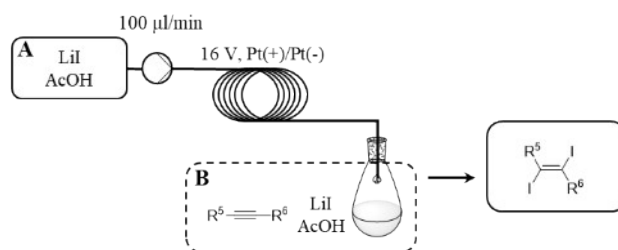

**Solution A:** The solution of lithium iodide (1 mmol, 0.5 M) dissolved in AcOH (2 ml) at a flow rate of 100 µl/min into the platinum electrodes reactor at a constant voltage of 16 V. **Solution B:** The solution of alkyne (0.2 mmol, 0.25 M), lithium bromide (0.4 mmol) dissolved in AcOH (0.8 ml). The solution from Solution A passed through the reactor and dripped into the flask containing Solution B. After Solution A's solution ran out, the product in the flask was collected. The slightly modified conditions were given in each case. Upon completion, the reaction mixture was diluted with EtOAc and washed with water and a saturated  $Na_2CO_3$  solution. The organic layer was dried over  $Na_2SO_4$  and concentrated to dryness. The residue was purified by flash chromatography on silica gel (n-hexane/ethyl acetate).

#### Small-scale flow electrochemical reaction for bromination

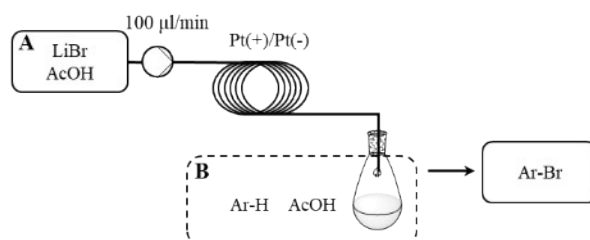

**Solution A:** The solution of lithium bromide (1 mmol, 0.5 M) dissolved in AcOH (2 ml) at a flow rate of 100 µl/min into the platinum electrodes reactor at a constant voltage of 8 V. **Solution B:** The solution of arene (0.2 mmol, 0.25 M) dissolved in AcOH (0.8 mL). The solution from Solution A passed through the reactor and dripped into the flask containing Solution B. After Solution A's solution ran out, the product in the flask was collected. The slightly modified conditions were given in each case. Upon completion, the reaction mixture was diluted with EtOAc and washed with water and a saturated  $Na_2CO_3$  solution. The organic layer was dried over  $Na_2SO_4$  and concentrated to dryness. The residue was purified by flash chromatography on silica gel (n-hexane/ethyl acetate).

#### Small-scale flow electrochemical reaction for chlorination

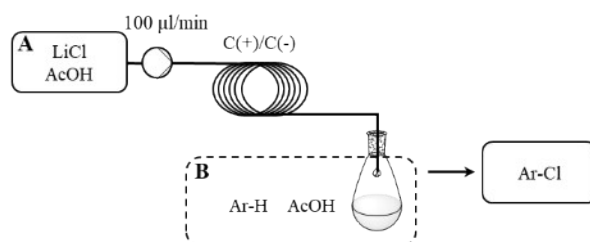

**Solution A:** The solution of lithium chloride (3 mmol, 0.5 M) dissolved in AcOH (6 ml) at a flow rate of 200 µl/min into the carbon fiber electrodes reactor at a constant voltage of 8 V. **Solution B:** The

solution of arene (0.2 mmol, 0.25 M) dissolved in AcOH (0.8 mL). The solution from Solution A passed through the reactor and dripped into the flask of Solution B. After Solution A's solution ran out, the product in the flask was collected. The slightly modified conditions were given in each case. Upon completion, the reaction mixture was diluted with EtOAc and washed with water and a saturated  $\text{Na}_2\text{CO}_3$  solution. The organic layer was dried over  $\text{Na}_2\text{SO}_4$  and concentrated to dryness. The residue was purified by flash chromatography on silica gel (*n*-hexane/ethyl acetate).

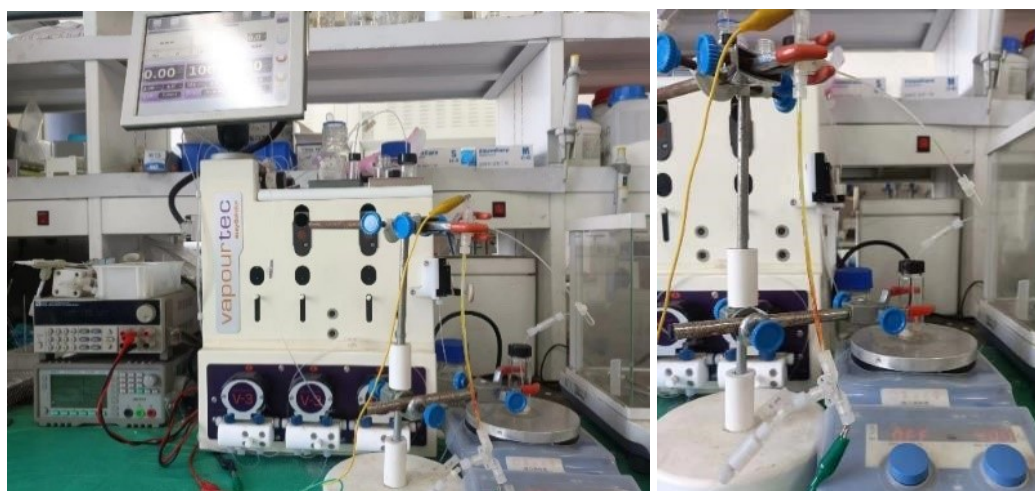

## 6. Investigation on the Z/E selectivity of the debrominations

The Z/E selectivity of the debromination was low (Table 2, 3a-3c), we suspected that  $\text{Br}_2$  was not the only electrophilic bromination reagent generated in the flow reactor; a higher valence of bromination agent was possibly generated (see SI for the detained investigation). Thanks for the very helpful comments. We have done more work to find out what is happening.

First, we tested the selectivity of using  $\text{Br}_2$  directly, adding  $\text{Br}_2$  slowly to the alkyne solution, and we obtained a good ratio of E-product.

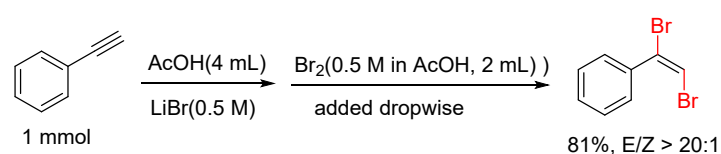

Since the above condition is very similar to our electrochemical conditions, we suspected that  $\text{Br}_2$  was not the only electrophilic bromination reagent generated in the flow reactor; a higher valence of bromination agent was possibly generated. To test this hypothesis, we run the following reaction at different voltages,

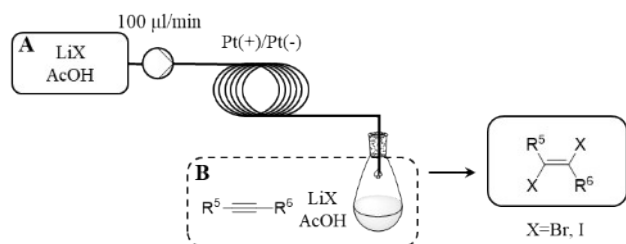

Solution A: LiBr (1 mmol), AcOH (2 mL); flow rate 100 µL/min

Solution B: Phenylacetylene (0.2 mmol), LiBr (0.4 mmol), AcOH (0.8 mL)

|         |     |       |        |
|---------|-----|-------|--------|
| voltage | 4 V | 8 V   | 16 V   |
| E/Z     | 7:1 | 1.4:1 | 0.14:1 |

We also tested higher voltage (20 v and 25v), but too much bubble was generated, and the temperature of the flow reactor increased significantly (around 50 °C). We can conclude that higher voltage leads to the formation of more Z-isomers. This result seems to confirm the formation of a higher valence bromination reagent.

## 7. Investigation of current efficiency

The debromination of alkene is highly efficient with a quantitative yield, so we use the isolation dibromo product to measure the Br<sub>2</sub> formation and calculate the current efficiency. In order to make all the Br<sub>2</sub> generated react with alkene, we use an excess amount of alkene in the reaction. Calculation of Current Efficiency (CE):

$$CE = M/M_{\text{theo}}$$

$$M_{\text{theo}} = (I \cdot T) / (F \cdot N)$$

M is the actual amount of product produced (M), M<sub>theo</sub> is the theoretical amount of product substance produced. I is the current in Amperes, T is the time in seconds, N is the oxidation state (2 in our case, because it needs 2 electrons to generate a Br<sub>2</sub> molecular), F is the Faraday constant (96485 C/mol, the charge of one mole of electrons).

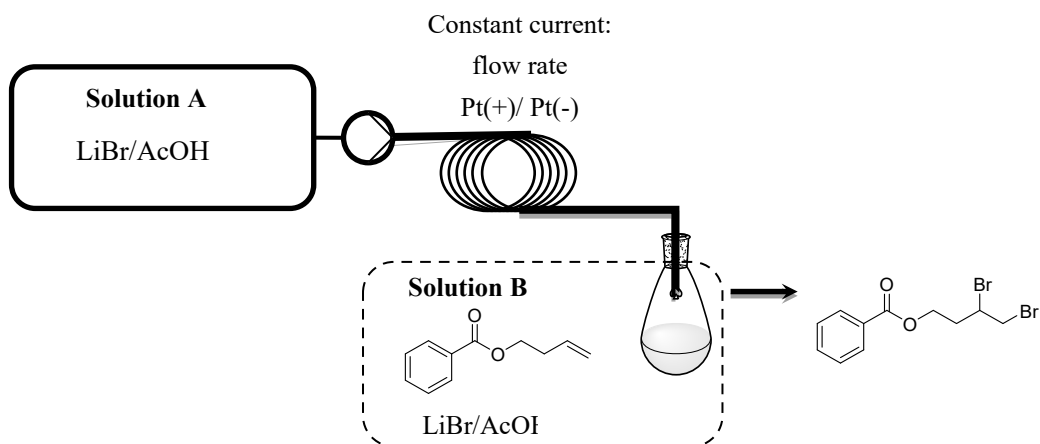

Conditions 1 (slow flow rate):

Solution A (1 mmol LiBr, 2 mL AcOH), Solution B (0.5 mmol alkene starting material, LiBr (1 mmol), AcOH (2 mL). Solution A flow rate: 100  $\mu\text{l}/\text{min}$ , constant current 25 mA (voltage is around 7.3-8.4 V), time 30 min, isolated dibromo product (47 mg, 0.14 mmol).

$$M_{\text{theo}} = (I \cdot T) / (F \cdot N) = (0.025 \text{ A} \cdot 30 \cdot 60 \text{ sec}) / (96485 \cdot 2) = 0.00023 \text{ mol} = 0.23 \text{ mmol}$$

$$M = M / M_{\text{theo}} = 0.14 / 0.23 = 61\%$$

$$F = It / ZNF = (0.025 \text{ A} \cdot 0.5 \text{ h}) / (2 \cdot 0.0002 \text{ mol} \cdot 26.8 \text{ Ah}) = 1.2 \text{ F/mol.}$$

### Conditions 2 (faster flow rate, shorter flow time):

Solution A (1 mmol LiBr, 2 mL AcOH), Solution B (0.2 mmol alkene starting material, LiBr 0.4 mmol, AcOH 0.8 mL). Solution A flow rate: 500  $\mu\text{l}/\text{min}$ , constant current 30 mA (voltage is around 7.3-8.4 V), time 7 min, isolated dibromo product (19.8 mg, 0.059 mmol).

$$M_{\text{theo}} = (I \cdot T) / (F \cdot N) = (0.030 \text{ A} \cdot 60 \cdot 7 \text{ sec}) / (96485 \cdot 2) = 0.000065 \text{ mol} = 0.065 \text{ mmol}$$

$$M = M / M_{\text{theo}} = 0.059 / 0.065 = 91\%$$

In general, the current efficiency is relatively high. At a faster flow, the current efficiency is even higher, possibly because the  $\text{Br}_2$  generated has less chance of being reduced by the cathode.

Measurement of reaction time:

- 1) Start passing solution A to the flow reactor; at this time, the electricity is off, and there is no solution or only pure solvent (AcOH) in the flow reactor.
- 2) When solution A arrives at the entrance of the flow reactor, turn on the electricity and start the counting of time. The flow of the solution is easy to see because the tubing is transparent.
- 3) When all solution A (e.g., 2 mL) was used, let a small amount of air enter the pump, and then add some fresh solvent (AcOH) to continue the flow.
- 4) When all solution A passes through the flow reactor, turn off the electricity and stop the counting of time. The color of the solution and the air bubble introduced in step 3 could help us determine the ending.

## 8. The characterization data of compounds

### 1,2-Dibromodecane (**2a**)<sup>4</sup>

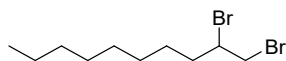

Colorless oil, 71% yield.  $^1\text{H}$  NMR (400 MHz, Chloroform-*d*)  $\delta$  4.20 – 4.14 (m, 1H), 3.85 (dd,  $J = 10.2, 4.5$  Hz, 1H), 3.63 (t,  $J = 10.0$  Hz, 1H), 2.18 – 2.09 (m, 1H), 1.83 – 1.73 (m, 1H), 1.61 – 1.52 (m, 1H), 1.45 – 1.36 (m, 1H), 1.28 (s, 9H), 0.89 (t,  $J = 6.6$  Hz, 3H).  $^{13}\text{C}$  NMR (100 MHz, Chloroform-*d*)  $\delta$  53.3, 36.5, 36.2, 32.0, 29.5, 29.3, 29.0, 26.9, 22.8, 14.3.

### 1,2-Dibromo-6-chlorohexane (**2b**)

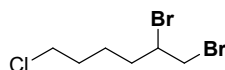

Colorless oil, 75% yield.  $^1\text{H}$  NMR (400 MHz, Chloroform-*d*)  $\delta$  4.20 – 4.14 (m, 1H), 3.87 (dd,  $J = 10.3$ , 4.4 Hz, 1H), 3.63 (t,  $J = 10.1$  Hz, 1H), 3.57 (t,  $J = 6.5$  Hz, 2H), 2.23 – 2.16 (m, 1H), 1.88 – 1.70 (m, 4H), 1.65 – 1.54 (m, 1H).  $^{13}\text{C}$  NMR (100 MHz, Chloroform-*d*)  $\delta$  52.5, 44.7, 36.2, 35.4, 31.9, 24.4. HRMS (FI<sup>+</sup>): Calcd. for  $\text{C}_6\text{H}_{11}\text{Br}_2\text{Cl}$  [ $\text{M}$ ]<sup>+</sup>:  $m/z$  275.8911, found: 275.8910.

#### 1,2,6-Tribromohexane (**2c**)<sup>5</sup>

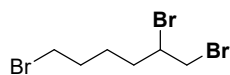

Colorless oil, 68% yield.  $^1\text{H}$  NMR (400 MHz, Chloroform-*d*)  $\delta$  4.20 – 4.13 (m, 1H), 3.87 (dd,  $J = 10.2$ , 4.3 Hz, 1H), 3.63 (t,  $J = 10.1$  Hz, 1H), 3.44 (t,  $J = 6.7$  Hz, 2H), 2.23 – 2.15 (m, 1H), 1.97 – 1.70 (m, 4H), 1.63 – 1.55 (m, 1H).  $^{13}\text{C}$  NMR (100 MHz, Chloroform-*d*)  $\delta$  52.4, 36.2, 33.3, 32.0, 25.7.

#### 1,2-Dibromocyclooctane (**2d**)<sup>6</sup>

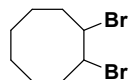

Colorless oil, 70% yield.  $^1\text{H}$  NMR (400 MHz, Chloroform-*d*)  $\delta$  4.61 – 4.56 (m, 2H), 2.45 – 2.38 (m, 2H), 2.14 – 2.05 (m, 2H), 1.90 – 1.81 (m, 2H), 1.74 – 1.66 (m, 2H), 1.65 – 1.54 (m, 2H), 1.51 – 1.42 (m, 2H).  $^{13}\text{C}$  NMR (100 MHz, Chloroform-*d*)  $\delta$  61.8, 33.4, 26.1, 25.5.

#### (1,2-Dibromoethyl)benzene (**2e**)<sup>7</sup>

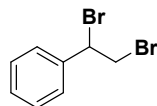

White solid, 73% yield.  $^1\text{H}$  NMR (400 MHz, Chloroform-*d*)  $\delta$  7.42 – 7.32 (m, 5H), 5.14 (dd,  $J = 10.6$ , 5.5 Hz, 1H), 4.07 (dd,  $J = 10.3$ , 5.5 Hz, 1H), 4.02 (t,  $J = 10.4$  Hz, 1H).  $^{13}\text{C}$  NMR (100 MHz, Chloroform-*d*)  $\delta$  138.7, 129.3, 129.0, 127.8, 51.0, 35.2.

#### 1-Bromo-4-(1,2-dibromoethyl)benzene (**2f**)<sup>7</sup>

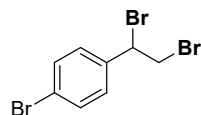

Yellow solid, 76% yield.  $^1\text{H}$  NMR (600 MHz, Chloroform-*d*)  $\delta$  7.52 – 7.50 (m, 2H), 7.29 – 7.26 (m, 2H), 5.08 (dd,  $J = 11.1$ , 5.0 Hz, 1H), 4.05 (dd,  $J = 10.3$ , 5.0 Hz, 1H), 3.98 – 3.94 (m, 1H).  $^{13}\text{C}$  NMR (150 MHz, Chloroform-*d*)  $\delta$  137.8, 132.2, 129.4, 123.3, 49.7, 34.7.

#### 1-(1,2-Dibromoethyl)-4-nitrobenzene (**2g**)

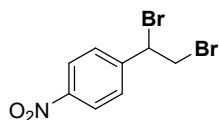

Yellow solid, 76% yield. <sup>1</sup>H NMR (400 MHz, Chloroform-*d*) δ 8.25 (d, *J* = 8.8 Hz, 2H), 7.59 (d, *J* = 8.8 Hz, 2H), 5.18 (dd, *J* = 11.3, 5.0 Hz, 1H), 4.10 (dd, *J* = 10.4, 5.0 Hz, 1H), 3.99 (t, *J* = 10.8 Hz, 1H). <sup>13</sup>C NMR (100 MHz, Chloroform-*d*) δ 148.2, 145.6, 128.9, 124.2, 47.9, 34.0. HRMS (EI<sup>+</sup>): Calcd. for C<sub>8</sub>H<sub>7</sub>O<sub>2</sub>NBr<sub>2</sub> [M]<sup>+</sup>: *m/z* 306.8838, found: 306.8836.

4-(1,2-Dibromoethyl)-1,1'-biphenyl (**2h**)<sup>7</sup>

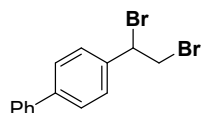

White solid, 66% yield. <sup>1</sup>H NMR (400 MHz, Chloroform-*d*) δ 7.60 – 7.57 (m, 4H), 7.44 (dd, *J* = 14.0, 8.0 Hz, 4H), 7.37 – 7.33 (m, 1H), 5.19 (dd, *J* = 10.4, 5.7 Hz, 1H), 4.12 – 4.03 (m, 2H). <sup>13</sup>C NMR (100 MHz, Chloroform-*d*) δ 142.2, 140.3, 137.6, 129.0, 128.2, 127.8, 127.7, 127.3, 50.8, 35.0.

2-(1,2-Dibromoethyl)naphthalene (**2i**)<sup>7</sup>

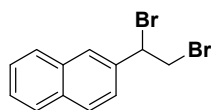

White solid, 75% yield. <sup>1</sup>H NMR (400 MHz, Chloroform-*d*) δ 7.88 – 7.82 (m, 4H), 7.52 – 7.49 (m, 3H), 5.32 (dd, *J* = 9.4, 6.7 Hz, 1H), 4.16 – 4.13 (m, 2H). <sup>13</sup>C NMR (100 MHz, Chloroform-*d*) δ 135.8, 133.6, 133.0, 129.2, 128.3, 127.9, 127.6, 127.0, 126.8, 124.5, 51.5, 34.9.

1-(4-((5,6-Dibromohexyl)oxy)phenyl)ethan-1-one (**2k**)

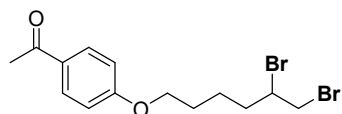

Colorless oil, 79% yield. <sup>1</sup>H NMR (400 MHz, Chloroform-*d*) δ 7.93 (d, *J* = 8.9 Hz, 2H), 6.93 (d, *J* = 8.9 Hz, 2H), 4.23 – 4.16 (m, 1H), 4.05 (t, *J* = 6.1 Hz, 2H), 3.87 (dd, *J* = 10.3, 4.3 Hz, 1H), 3.64 (t, *J* = 10.1 Hz, 1H), 2.55 (s, 3H), 2.29 – 2.20 (m, 1H), 1.92 – 1.75 (m, 4H), 1.67 – 1.59 (m, 1H). <sup>13</sup>C NMR (100 MHz, Chloroform-*d*) δ 196.8, 163.0, 130.7, 130.3, 114.2, 67.8, 52.6, 36.2, 35.8, 28.4, 26.5, 23.6. HRMS (DART<sup>+</sup>): Calcd. for C<sub>14</sub>H<sub>19</sub>O<sub>2</sub>Br<sub>2</sub> [M+H]<sup>+</sup>: *m/z* 376.9746, found: 376.9744.

1-((5,6-Dibromohexyl)oxy)-4-nitrobenzene (**2l**)

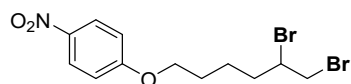

Brown oil, 91% yield.  $^1\text{H}$  NMR (400 MHz, Chloroform-*d*)  $\delta$  8.21 – 8.17 (m, 2H), 6.97 – 6.93 (m, 2H), 4.23 – 4.17 (m, 1H), 4.09 (t,  $J = 6.2$  Hz, 2H), 3.88 (dd,  $J = 10.3, 4.3$  Hz, 1H), 3.65 (t,  $J = 10.1$  Hz, 1H), 2.30 – 2.21 (m, 1H), 1.98 – 1.76 (m, 4H), 1.68 – 1.61 (m, 1H).  $^{13}\text{C}$  NMR (100 MHz, Chloroform-*d*)  $\delta$  164.1, 141.5, 126.0, 114.5, 68.5, 52.5, 36.2, 35.7, 28.3, 23.6. HRMS (EI $^+$ ): Calcd. for  $\text{C}_{12}\text{H}_{15}\text{O}_3\text{NBr}_2$   $[\text{M}]^+$ :  $m/z$  378.9413, found: 378.9418.

#### 4-((5,6-Dibromohexyl)oxy)benzonitrile (**2m**)

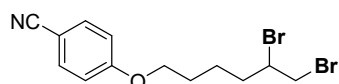

Colorless oil, 85% yield.  $^1\text{H}$  NMR (400 MHz, Chloroform-*d*)  $\delta$  7.58 (d,  $J = 8.9$  Hz, 2H), 6.94 (d,  $J = 8.9$  Hz, 2H), 4.23 – 4.16 (m, 1H), 4.03 (t,  $J = 6.1$  Hz, 2H), 3.87 (dd,  $J = 10.3, 4.4$  Hz, 1H), 3.64 (t,  $J = 10.1$  Hz, 1H), 2.29 – 2.20 (m, 1H), 1.95 – 1.73 (m, 4H), 1.68 – 1.57 (m, 1H).  $^{13}\text{C}$  NMR (100 MHz, Chloroform-*d*)  $\delta$  162.3, 134.1, 119.4, 115.3, 104.0, 68.0, 52.6, 36.2, 35.7, 28.3, 23.6. HRMS (DART $^+$ ): Calcd. for  $\text{C}_{13}\text{H}_{16}\text{ONBr}_2$   $[\text{M}+\text{H}]^+$ :  $m/z$  359.9593, found: 359.9592.

#### 3,4-Dibromobutyl cyclohexanecarboxylate (**2n**)

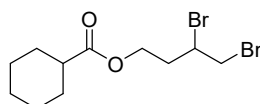

Yellow oil, 70% yield.  $^1\text{H}$  NMR (400 MHz, Chloroform-*d*)  $\delta$  4.37 – 4.32 (m, 1H), 4.30 – 4.18 (m, 2H), 3.89 (dd,  $J = 10.3, 4.3$  Hz, 1H), 3.66 (t,  $J = 10.1$  Hz, 1H), 2.59 – 2.51 (m, 1H), 2.35 – 2.28 (m, 1H), 2.08 – 1.99 (m, 1H), 1.93 – 1.88 (m, 2H), 1.79 – 1.73 (m, 2H), 1.67 – 1.62 (m, 1H), 1.50 – 1.40 (m, 2H), 1.34 – 1.17 (m, 3H).  $^{13}\text{C}$  NMR (100 MHz, Chloroform-*d*)  $\delta$  175.9, 61.6, 48.8, 43.2, 36.3, 35.4, 29.1, 25.8, 25.5. HRMS (DART $^+$ ): Calcd. for  $\text{C}_{11}\text{H}_{19}\text{O}_2\text{Br}_2$   $[\text{M}+\text{H}]^+$ :  $m/z$  340.9746, found: 340.9746.

#### 3,4-Dibromobutyl octanoate (**2o**)

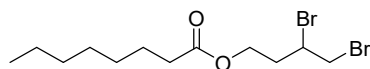

Colorless oil, 61% yield.  $^1\text{H}$  NMR (400 MHz, Chloroform-*d*)  $\delta$  4.38 – 4.32 (m, 1H), 4.30 – 4.19 (m, 2H), 3.89 (dd,  $J = 10.4, 4.3$  Hz, 1H), 3.66 (t,  $J = 10.0$  Hz, 1H), 2.59 – 2.51 (m, 1H), 2.32 (t,  $J = 7.5$  Hz, 2H), 2.09 – 2.01 (m, 1H), 1.67 – 1.59 (m, 2H), 1.34 – 1.26 (m, 8H), 0.90 – 0.87 (m, 3H).  $^{13}\text{C}$  NMR (100 MHz, Chloroform-*d*)  $\delta$  173.7, 61.7, 48.7, 36.2, 35.4, 34.4, 31.8, 29.2, 29.0, 25.1, 22.7, 14.2. HRMS (DART $^+$ ): Calcd. for  $\text{C}_{12}\text{H}_{23}\text{O}_2\text{Br}_2$   $[\text{M}+\text{H}]^+$ :  $m/z$  357.0059, found: 357.0057.

#### 3,4-Dibromobutyl benzoate (**2p**)

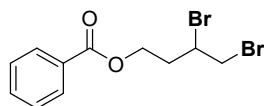

Yellow oil, 92% yield.  $^1\text{H}$  NMR (400 MHz, Chloroform-*d*)  $\delta$  8.05 (dd,  $J = 8.3, 1.4$  Hz, 2H), 7.60 – 7.55 (m, 1H), 7.45 (t,  $J = 7.7$  Hz, 2H), 4.62 – 4.57 (m, 1H), 4.51 – 4.45 (m, 1H), 4.39 – 4.33 (m, 1H), 3.92 (dd,  $J = 10.3, 4.3$  Hz, 1H), 3.71 (t,  $J = 10.0$  Hz, 1H), 2.75 – 2.67 (m, 1H), 2.24 – 2.15 (m, 1H).  $^{13}\text{C}$  NMR (100 MHz, Chloroform-*d*)  $\delta$  166.4, 133.2, 129.7, 128.5, 62.4, 48.7, 36.3, 35.4. HRMS (DART $^+$ ): Calcd. for  $\text{C}_{11}\text{H}_{13}\text{O}_2\text{Br}_2$   $[\text{M}+\text{H}]^+$ :  $m/z$  334.9277, found: 334.9276.

#### 3,4-Dibromobutyl 3-methylbenzoate (**2q**)

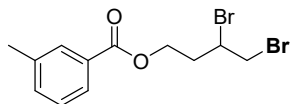

Colorless oil, 63% yield.  $^1\text{H}$  NMR (400 MHz, Chloroform-*d*)  $\delta$  7.84 (d,  $J = 11.2$  Hz, 2H), 7.39 – 7.31 (m, 2H), 4.61 – 4.56 (m, 1H), 4.50 – 4.44 (m, 1H), 4.39 – 4.32 (m, 1H), 3.92 (dd,  $J = 10.4, 4.3$  Hz, 1H), 3.71 (t,  $J = 10.0$  Hz, 1H), 2.74 – 2.66 (m, 1H), 2.41 (s, 3H), 2.24 – 2.16 (m, 1H).  $^{13}\text{C}$  NMR (100 MHz, Chloroform-*d*)  $\delta$  166.6, 138.3, 134.0, 130.3, 129.9, 128.4, 126.8, 62.4, 48.7, 36.3, 35.4, 21.4. HRMS (DART $^+$ ): Calcd. for  $\text{C}_{12}\text{H}_{15}\text{O}_2\text{Br}_2$   $[\text{M}+\text{H}]^+$ :  $m/z$  348.9433, found: 348.9432.

#### 3,4-Dibromobutyl 4-methylbenzoate (**2r**)

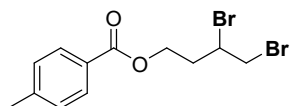

Yellow oil, 68% yield.  $^1\text{H}$  NMR (400 MHz, Chloroform-*d*)  $\delta$  7.93 (d,  $J = 8.3$  Hz, 2H), 7.25 (d,  $J = 8.0$  Hz, 2H), 4.60 – 4.54 (m, 1H), 4.49 – 4.42 (m, 1H), 4.38 – 4.32 (m, 1H), 3.92 (dd,  $J = 10.4, 4.3$  Hz, 1H), 3.71 (t,  $J = 10.0$  Hz, 1H), 2.73 – 2.65 (m, 1H), 2.41 (s, 3H), 2.23–2.14 (m, 1H).  $^{13}\text{C}$  NMR (100 MHz, Chloroform-*d*)  $\delta$  166.5, 144.0, 129.7, 129.3, 127.2, 62.3, 48.8, 36.3, 35.4, 21.8. HRMS (DART $^+$ ): Calcd. for  $\text{C}_{12}\text{H}_{15}\text{O}_2\text{Br}_2$   $[\text{M}+\text{H}]^+$ :  $m/z$  348.9433, found: 348.9432.

#### 3,4-Dibromobutyl 4-methoxybenzoate (**2s**)

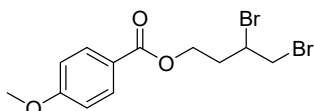

Yellow oil, 62% yield.  $^1\text{H}$  NMR (400 MHz, Chloroform-*d*)  $\delta$  7.99 (d,  $J = 8.9$  Hz, 2H), 6.92 (d,  $J = 8.9$  Hz, 2H), 4.58 – 4.53 (m, 1H), 4.47 – 4.41 (m, 1H), 4.38 – 4.32 (m, 1H), 3.91 (dd,  $J = 10.4, 4.3$  Hz, 1H), 3.85 (s, 3H), 3.70 (t,  $J = 10.0$  Hz, 1H), 2.72 – 2.64 (m, 1H), 2.23 – 2.14 (m, 1H).  $^{13}\text{C}$  NMR (100 MHz, Chloroform-*d*)  $\delta$  166.0, 163.5, 131.7, 122.3, 113.7, 62.1, 55.5, 48.8, 35.4. HRMS (DART $^+$ ): Calcd. for  $\text{C}_{12}\text{H}_{15}\text{O}_3\text{Br}_2$   $[\text{M}+\text{H}]^+$ :  $m/z$  364.9382, found: 364.9380.

#### 3,4-Dibromobutyl 4-chlorobenzoate (**2t**)

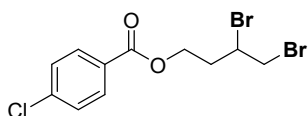



Colorless oil, 84% yield.  $^1\text{H}$  NMR (400 MHz, Chloroform-*d*)  $\delta$  7.99 – 7.97 (m, 2H), 7.44 – 7.41 (m, 2H), 4.62 – 4.56 (m, 1H), 4.51 – 4.45 (m, 1H), 4.37 – 4.30 (m, 1H), 3.92 (dd,  $J = 10.3, 4.3$  Hz, 1H), 3.70 (t,  $J = 10.1$  Hz, 1H), 2.75 – 2.66 (m, 1H), 2.25 – 2.16 (m, 1H).  $^{13}\text{C}$  NMR (100 MHz, Chloroform-*d*)  $\delta$  165.5, 139.7, 131.1, 128.9, 128.4, 62.7, 48.5, 36.1, 35.3. HRMS (FI $^+$ ): Calcd. for  $\text{C}_{11}\text{H}_{11}\text{O}_2\text{Br}_2\text{Cl}$   $[\text{M}]^+$ :  $m/z$  367.8809, found: 367.8806.

#### 3,4-Dibromobutyl 4-fluorobenzoate (**2u**)

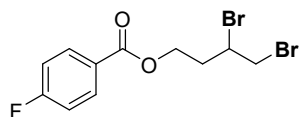

Colorless oil, 75% yield.  $^1\text{H}$  NMR (400 MHz, Chloroform-*d*)  $\delta$  8.08 – 8.05 (m, 2H), 7.12 (t,  $J = 8.6$  Hz, 2H), 4.62 – 4.56 (m, 1H), 4.51 – 4.45 (m, 1H), 4.38 – 4.31 (m, 1H), 3.93 (dd,  $J = 10.4, 4.3$  Hz, 1H), 3.70 (t,  $J = 10.1$  Hz, 1H), 2.75 – 2.67 (m, 1H), 2.25 – 2.16 (m, 1H).  $^{19}\text{F}$  NMR (376 MHz, Chloroform-*d*)  $\delta$  -105.2 - -105.3 (m, 1F).  $^{13}\text{C}$  NMR (100 MHz, Chloroform-*d*)  $\delta$  165.9 (d,  $J = 254.3$  Hz), 165.3, 132.2 (d,  $J = 9.4$  Hz), 126.1 (d,  $J = 3.0$  Hz), 115.6 (d,  $J = 22.0$  Hz), 62.5, 48.5, 36.1, 35.2. HRMS (FI $^+$ ): Calcd. for  $\text{C}_{11}\text{H}_{11}\text{O}_2\text{Br}_2\text{F}$   $[\text{M}]^+$ :  $m/z$  351.9104, found: 351.9103.

#### 3,4-Dibromobutyl 4-(trifluoromethyl)benzoate (**2v**)

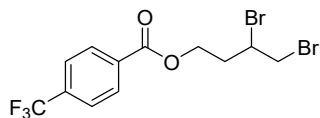

Colorless oil, 85% yield.  $^1\text{H}$  NMR (400 MHz, Chloroform-*d*)  $\delta$  8.16 (d,  $J = 8.1$  Hz, 2H), 7.72 (d,  $J = 8.2$  Hz, 2H), 4.66 – 4.61 (m, 1H), 4.56 – 4.50 (m, 1H), 4.38 – 4.31 (m, 1H), 3.94 (dd,  $J = 10.3, 4.3$  Hz, 1H), 3.71 (t,  $J = 10.2$  Hz, 1H), 2.78 – 2.70 (m, 1H), 2.28 – 2.19 (m, 1H).  $^{19}\text{F}$  NMR (376 MHz, Chloroform-*d*)  $\delta$  -63.1.  $^{13}\text{C}$  NMR (100 MHz, Chloroform-*d*)  $\delta$  165.2, 134.7 (q,  $J = 32.5$  Hz), 133.2, 130.2, 125.6 (q,  $J = 3.7$  Hz), 123.7 (q,  $J = 271.1$  Hz), 63.1, 48.4, 36.0, 35.3. HRMS (FI $^+$ ): Calcd. for  $\text{C}_{12}\text{H}_{11}\text{O}_2\text{Br}_2\text{F}_3$   $[\text{M}]^+$ :  $m/z$  401.9072, found: 401.9070.

#### 3,4-Dibromobutyl 4-nitrobenzoate (**2w**)

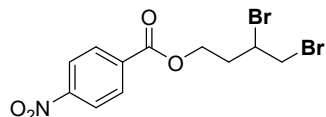

Yellow solid, 88% yield.  $^1\text{H}$  NMR (400 MHz, Chloroform-*d*)  $\delta$  8.31 (d,  $J = 9.0$  Hz, 2H), 8.23 (d,  $J = 8.9$  Hz, 2H), 4.69 – 4.63 (m, 1H), 4.59 – 4.53 (m, 1H), 4.38 – 4.32 (m, 1H), 3.95 (dd,  $J = 10.3, 4.3$  Hz, 1H), 3.72 (t,  $J = 10.2$  Hz, 1H), 2.80 – 2.72 (m, 1H), 2.30 – 2.21 (m, 1H).  $^{13}\text{C}$  NMR (100 MHz, Chloroform-*d*)  $\delta$  164.5, 150.70, 135.3, 130.9, 123.7, 63.4, 48.2, 36.0, 35.1. HRMS (FI $^+$ ): Calcd. for  $\text{C}_{11}\text{H}_{11}\text{O}_4\text{NBr}_2$   $[\text{M}]^+$ :  $m/z$  378.9049, found: 378.9054.

#### 3,4-Dibromobutyl 4-cyanobenzoate (**2x**)

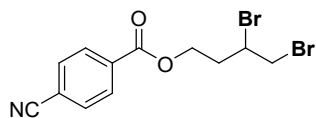

Colorless oil, 92% yield.  $^1\text{H}$  NMR (400 MHz, Chloroform-*d*)  $\delta$  8.15 (d,  $J = 8.3$  Hz, 2H), 7.77 (d,  $J = 8.3$  Hz, 2H), 4.67 – 4.61 (m, 1H), 4.57 – 4.51 (m, 1H), 4.37 – 4.30 (m, 1H), 3.94 (dd,  $J = 10.3, 4.3$  Hz, 1H), 3.71 (t,  $J = 10.2$  Hz, 1H), 2.78 – 2.69 (m, 1H), 2.28 – 2.19 (m, 1H).  $^{13}\text{C}$  NMR (100 MHz, Chloroform-*d*)  $\delta$  164.7, 133.7, 132.4, 130.2, 118.0, 116.7, 63.3, 48.3, 36.0, 35.2. HRMS (FI $^+$ ): Calcd. for  $\text{C}_{12}\text{H}_{11}\text{O}_2\text{NBr}_2$  [ $\text{M}$ ] $^+$ :  $m/z$  358.9150, found: 358.9148.

#### Methyl 4-(1,2-dibromoethyl)benzoate (**2y**)<sup>8</sup>

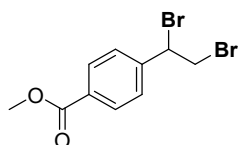

Yellow solid, 72% yield.  $^1\text{H}$  NMR (600 MHz, Chloroform-*d*)  $\delta$  8.06 (d,  $J = 8.4$  Hz, 2H), 7.48 (d,  $J = 8.4$  Hz, 2H), 5.15 (dd,  $J = 11.0, 5.1$  Hz, 1H), 4.08 (dd,  $J = 10.3, 5.1$  Hz, 1H), 4.01 (t,  $J = 10.7$  Hz, 1H), 3.92 (s, 3H).  $^{13}\text{C}$  NMR (150 MHz, Chloroform-*d*)  $\delta$  166.5, 143.5, 130.9, 130.3, 127.9, 52.4, 49.4, 34.5.

#### Benzyl 6,7-dibromoheptanoate (**2z**)

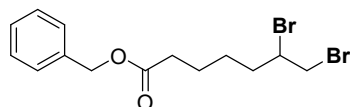

Colorless oil, 83% yield.  $^1\text{H}$  NMR (400 MHz, Chloroform-*d*)  $\delta$  7.39 – 7.30 (m, 5H), 5.12 (s, 2H), 4.17 – 4.10 (m, 1H), 3.82 (dd,  $J = 10.3, 4.4$  Hz, 1H), 3.59 (t,  $J = 10.0$  Hz, 1H), 2.39 (t,  $J = 7.3$  Hz, 2H), 2.19 – 2.11 (m, 1H), 1.85 – 1.58 (m, 4H), 1.47 – 1.44 (m, 1H).  $^{13}\text{C}$  NMR (100 MHz, Chloroform-*d*)  $\delta$  173.2, 136.1, 128.7, 128.3, 66.3, 52.6, 36.3, 35.8, 34.1, 26.4, 24.2. HRMS (DART $^+$ ): Calcd. for  $\text{C}_{14}\text{H}_{19}\text{O}_2\text{Br}_2$  [ $\text{M}+\text{H}$ ] $^+$ :  $m/z$  376.9746, found: 376.9746.

#### 3,4-Dibromobutyl furan-2-carboxylate (**2aa**)

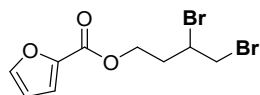

Yellow oil, 80% yield.  $^1\text{H}$  NMR (600 MHz, Chloroform-*d*)  $\delta$  7.60 (s, 1H), 7.21 (d,  $J = 3.4$  Hz, 1H), 6.53 – 6.52 (m, 1H), 4.59 – 4.56 (m, 1H), 4.49 – 4.45 (m, 1H), 4.36 – 4.31 (m, 1H), 3.91 (dd,  $J = 10.4, 4.4$  Hz, 1H), 3.71 (t,  $J = 10.0$  Hz, 1H), 2.69 – 2.64 (m, 1H), 2.22 – 2.16 (m, 1H).  $^{13}\text{C}$  NMR (150 MHz, Chloroform-*d*)  $\delta$  158.5, 146.7, 144.4, 118.4, 112.0, 62.4, 48.5, 36.2, 35.3. HRMS (DART $^+$ ): Calcd. for  $\text{C}_9\text{H}_{11}\text{O}_3\text{Br}_2$  [ $\text{M}+\text{H}$ ] $^+$ :  $m/z$  324.9069, found: 324.9069.

#### 3,4-Dibromobutyl thiophene-2-carboxylate (**2ab**)

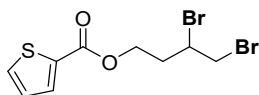

Yellow oil, 73% yield.  $^1\text{H NMR}$  (400 MHz, Chloroform-*d*)  $\delta$  7.82 (dd,  $J = 3.7, 1.3$  Hz, 1H), 7.57 (dd,  $J = 5.0, 1.3$  Hz, 1H), 7.11 (dd,  $J = 5.0, 3.7$  Hz, 1H), 4.59 – 4.54 (m, 1H), 4.49 – 4.43 (m, 1H), 4.37 – 4.30 (m, 1H), 3.92 (dd,  $J = 10.4, 4.4$  Hz, 1H), 3.71 (t,  $J = 10.0$  Hz, 1H), 2.71 – 2.63 (m, 1H), 2.24 – 2.15 (m, 1H).  $^{13}\text{C NMR}$  (100 MHz, Chloroform-*d*)  $\delta$  162.0, 133.8, 133.5, 132.8, 128.0, 62.6, 48.6, 36.2, 35.4. HRMS (DART<sup>+</sup>): Calcd. for  $\text{C}_9\text{H}_{11}\text{O}_2\text{Br}_2\text{S}$   $[\text{M}+\text{H}]^+$ :  $m/z$  340.8841, found: 340.8840.

#### 2-(3,4-Dibromobutyl)isoindoline-1,3-dione (**2ac**)

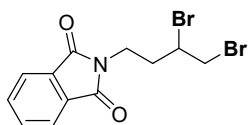

White solid, 74% yield.  $^1\text{H NMR}$  (400 MHz, Chloroform-*d*)  $\delta$  7.86 (dd,  $J = 5.4, 3.1$  Hz, 2H), 7.74 (dd,  $J = 5.5, 3.1$  Hz, 2H), 4.21 – 4.15 (m, 1H), 3.98 – 3.85 (m, 3H), 3.67 (t,  $J = 10.0$  Hz, 1H), 2.76 – 2.59 (m, 1H), 2.23 – 2.13 (m, 1H).  $^{13}\text{C NMR}$  (100 MHz, Chloroform-*d*)  $\delta$  168.3, 134.2, 132.0, 123.5, 49.0, 36.0, 35.1. HRMS (DART<sup>+</sup>): Calcd. for  $\text{C}_{12}\text{H}_{12}\text{O}_2\text{NBr}_2$   $[\text{M}+\text{H}]^+$ :  $m/z$  359.9229, found: 359.9227.

#### 2-(5,6-Dibromohexyl)isoindoline-1,3-dione (**2ad**)

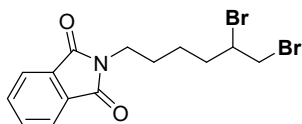

White solid, 74% yield.  $^1\text{H NMR}$  (400 MHz, Chloroform-*d*)  $\delta$  7.85 (dd,  $J = 5.4, 3.1$  Hz, 2H), 7.72 (dd,  $J = 5.4, 3.0$  Hz, 2H), 4.18 – 4.12 (m, 1H), 3.84 (dd,  $J = 10.3, 4.4$  Hz, 1H), 3.72 (t,  $J = 7.1$  Hz, 2H), 3.62 (t,  $J = 10.0$  Hz, 1H), 2.26 – 2.17 (m, 1H), 1.88 – 1.60 (m, 4H), 1.54 – 1.43 (m, 1H).  $^{13}\text{C NMR}$  (100 MHz, Chloroform-*d*)  $\delta$  168.5, 134.0, 132.2, 52.6, 37.76, 36.3, 35.6, 27.9, 24.3. HRMS (DART<sup>+</sup>): Calcd. for  $\text{C}_{14}\text{H}_{16}\text{O}_2\text{NBr}_2$   $[\text{M}+\text{H}]^+$ :  $m/z$  387.9542, found: 387.9541.

#### 2-(7,8-Dibromooctyl)isoindoline-1,3-dione (**2ae**)

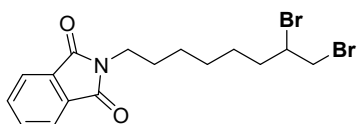

Colorless oil, 84% yield.  $^1\text{H NMR}$  (400 MHz, Chloroform-*d*)  $\delta$  7.84 (dd,  $J = 5.4, 3.1$  Hz, 2H), 7.72 (dd,  $J = 5.5, 3.0$  Hz, 2H), 4.19 – 4.12 (m, 1H), 3.83 (dd,  $J = 10.2, 4.5$  Hz, 1H), 3.69 (t,  $J = 7.2$  Hz, 2H), 3.62 (t,  $J = 10.0$  Hz, 1H), 2.16 – 2.08 (m, 1H), 1.82 – 1.66 (m, 3H), 1.61 – 1.52 (m, 1H), 1.46-1.36 (m, 5H).  $^{13}\text{C NMR}$  (100 MHz, Chloroform-*d*)  $\delta$  168.4, 133.9, 132.1, 123.1, 53.0, 37.9, 36.4, 35.9, 29.7, 28.5, 28.3, 26.6. HRMS (DART<sup>+</sup>): Calcd. for  $\text{C}_{16}\text{H}_{20}\text{O}_2\text{NBr}_2$   $[\text{M}+\text{H}]^+$ :  $m/z$  415.9855, found: 415.9853.

(*Z/E*)-(1,2-Dibromovinyl)benzene (**3a**)<sup>9</sup>

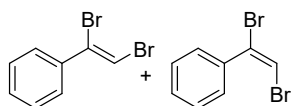

Yellow oil, 90% yield, *Z/E*=10:7. *Z* isomer: <sup>1</sup>H NMR (600 MHz, Chloroform-*d*) δ 7.51 – 7.48 (m, 5H), 7.04 (s, 1H); *E* isomer: <sup>1</sup>H NMR (600 MHz, Chloroform-*d*) δ 7.40 – 7.34 (m, 5H), 6.79 (s, 1H).

(*Z+E*)-4-(1,2-Dibromovinyl)benzonitrile (**3b**)<sup>9</sup>

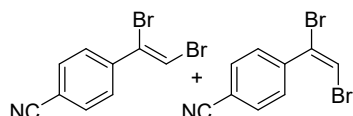

Yellow solid, 83% yield, *Z/E*=10:11. *Z* isomer: <sup>1</sup>H NMR (400 MHz, Chloroform-*d*) δ 7.71 – 7.65 (m, 4H), 7.24 (s, 1H); *E* isomer: <sup>1</sup>H NMR (400 MHz, Chloroform-*d*) δ 7.63 – 7.60 (m, 4H), 6.91 (s, 1H).

(*Z+E*)-1-Bromo-4-(1,2-dibromovinyl)benzene (**3c**)<sup>10</sup>

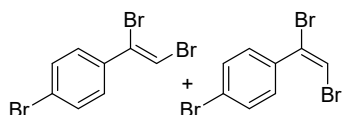

Yellow oil, 85% yield. *Z* isomer: <sup>1</sup>H NMR (400 MHz, Chloroform-*d*) δ 7.53 – 7.48 (m, 2H), 7.39 – 7.36 (m, 2H), 7.06 (s, 1H). *E* isomer: <sup>1</sup>H NMR (400 MHz, Chloroform-*d*) δ 7.47 – 7.46 (m, 2H), 7.36 – 7.34 (m, 2H), 6.81 (s, 1H)

(*E*)-(1,2-Diiodovinyl)benzene (**4a**)<sup>11</sup>

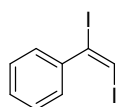

Yellow solid, 77% yield. <sup>1</sup>H NMR (400 MHz, Chloroform-*d*) δ 7.36 – 7.29 (m, 5H), 7.25 (s, 1H). <sup>13</sup>C NMR (150 MHz, Chloroform-*d*) δ 143.2, 129.1, 128.6, 128.6, 96.3, 81.0.

(*E*)-1-Bromo-4-(1,2-diiodovinyl)benzene (**4b**)<sup>11</sup>

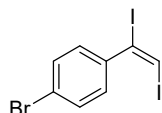

Yellow solid, 93% yield. <sup>1</sup>H NMR (400 MHz, Chloroform-*d*) δ 7.51 – 7.48 (m, 2H), 7.28 (s, 1H), 7.25 – 7.21 (m, 2H). <sup>13</sup>C NMR (150 MHz, Chloroform-*d*) δ 142.1, 131.8, 130.3, 123.2, 94.7, 81.8.

1-Bromo-2-methoxynaphthalene (**5a**)<sup>12</sup>

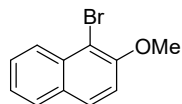

Yellow solid, 80% yield.  $^1\text{H}$  NMR (400 MHz, Chloroform-*d*)  $\delta$  8.21 (dd,  $J = 8.6, 1.0$  Hz, 1H), 7.79 – 7.74 (m, 2H), 7.56 – 7.52 (m, 1H), 7.39 – 7.35 (m, 1H), 7.23 (d,  $J = 9.0$  Hz, 1H), 3.99 (s, 3H).  $^{13}\text{C}$  NMR (100 MHz, Chloroform-*d*)  $\delta$  153.8, 133.2, 129.9, 129.1, 128.1, 127.8, 126.2, 124.4, 113.7, 108.7, 57.1.

1-Bromo-4-methoxynaphthalene (**5b**)<sup>13</sup>

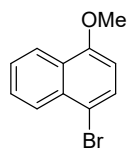

Yellow oil, 95% yield.  $^1\text{H}$  NMR (600 MHz, Chloroform-*d*)  $\delta$  8.25 (d,  $J = 8.4$  Hz, 1H), 8.15 (d,  $J = 8.5$  Hz, 1H), 7.62 – 7.56 (m, 2H), 7.51 – 7.47 (m, 1H), 6.61 (d,  $J = 8.2$  Hz, 1H), 3.92 (s, 3H).  $^{13}\text{C}$  NMR (150 MHz, Chloroform-*d*)  $\delta$  155.3, 132.5, 129.6, 127.9, 127.0, 126.9, 126.0, 122.5, 113.3, 104.6, 55.8.

2-Bromo-1,4-dimethoxybenzene (**5c**)<sup>12</sup>

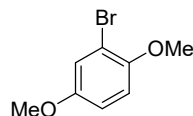

Yellow oil, 82% yield.  $^1\text{H}$  NMR (600 MHz, Chloroform-*d*)  $\delta$  7.12 (d,  $J = 2.8$  Hz, 1H), 6.84 – 6.80 (m, 2H), 3.84 (s, 3H), 3.75 (s, 3H).  $^{13}\text{C}$  NMR (150 MHz, Chloroform-*d*)  $\delta$  154.1, 150.4, 119.1, 113.8, 113.0, 112.0, 57.0, 56.0.

4-Bromo-1,2-dimethoxybenzene (**5d**)<sup>12</sup>

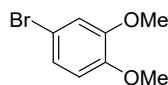

Yellow oil, 98% yield.  $^1\text{H}$  NMR (600 MHz, Chloroform-*d*)  $\delta$  7.05 – 6.97 (m, 2H), 6.73 (d,  $J = 8.5$  Hz, 1H), 3.86 (s, 3H), 3.85 (s, 3H).  $^{13}\text{C}$  NMR (150 MHz, Chloroform-*d*)  $\delta$  149.8, 148.4, 123.4, 114.8, 112.8, 112.5, 56.1, 56.1.

2-Bromo-4-ethyl-1-methoxybenzene (**5e**)<sup>13</sup>

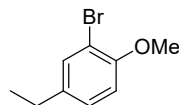

Yellow oil, 81% yield.  $^1\text{H}$  NMR (600 MHz, Chloroform-*d*)  $\delta$  7.38 (d,  $J = 2.2$  Hz, 1H), 7.08 (dd,  $J = 8.4, 2.2$  Hz, 1H), 6.81 (d,  $J = 8.3$  Hz, 1H), 3.86 (s, 3H), 2.59 – 2.55 (m, 2H), 1.20 (t,  $J = 7.6$  Hz, 3H).  $^{13}\text{C}$  NMR (150 MHz, Chloroform-*d*)  $\delta$  154.0, 138.1, 132.7, 127.8, 112.0, 111.5, 56.4, 27.8, 15.8.

4-Bromo-3,5-dimethyl-1-phenyl-1H-pyrazole (**5f**)<sup>14</sup>

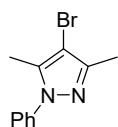

Brown oil, 100% yield. <sup>1</sup>H NMR (600 MHz, Chloroform-*d*)  $\delta$  7.47 – 7.35 (m, 5H), 2.30 (s, 6H). <sup>13</sup>C NMR (150 MHz, Chloroform-*d*)  $\delta$  147.6, 139.9, 137.6, 129.2, 127.9, 124.7, 96.5, 12.5, 11.9.

3-Bromo-2,6-dimethoxypyridine (**5g**)<sup>15</sup>

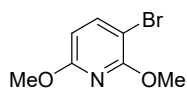

Yellow oil, 83% yield. <sup>1</sup>H NMR (400 MHz, Chloroform-*d*)  $\delta$  7.63 (d, *J* = 8.3 Hz, 1H), 6.23 (d, *J* = 8.3 Hz, 1H), 3.99 (s, 3H), 3.90 (s, 3H). <sup>13</sup>C NMR (150 MHz, Chloroform-*d*)  $\delta$  162.2, 158.5, 143.7, 102.8, 95.5, 54.3, 53.9.

1-Chloro-2-methoxynaphthalene (**6a**)<sup>16</sup>

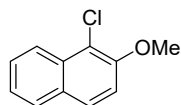

Yellow solid, 96% yield. <sup>1</sup>H NMR (600 MHz, Chloroform-*d*)  $\delta$  8.20 (d, *J* = 8.6 Hz, 1H), 7.73 (dd, *J* = 22.4, 8.6 Hz, 2H), 7.54 (t, *J* = 7.7 Hz, 1H), 7.37 (t, *J* = 7.5 Hz, 1H), 7.24 – 7.22 (m, 1H), 3.98 (s, 3H). <sup>13</sup>C NMR (150 MHz, Chloroform-*d*)  $\delta$  152.6, 131.9, 129.6, 128.1, 128.1, 127.5, 124.4, 123.5, 116.8, 113.7, 57.0.

1-Chloronaphthalen-2-ol (**6b**)<sup>16</sup>

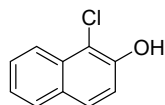

Brown solid, 80% yield. <sup>1</sup>H NMR (600 MHz, Chloroform-*d*)  $\delta$  8.04 (d, *J* = 8.5 Hz, 1H), 7.76 (d, *J* = 8.1 Hz, 1H), 7.67 (d, *J* = 8.9 Hz, 1H), 7.55 (t, *J* = 7.7 Hz, 1H), 7.37 (t, *J* = 7.5 Hz, 1H), 7.24 (d, *J* = 8.9 Hz, 1H), 5.92 (s, 1H). <sup>13</sup>C NMR (150 MHz, Chloroform-*d*)  $\delta$  149.4, 131.2, 129.6, 128.5, 128.3, 127.7, 124.3, 122.9, 117.3, 113.4.

2-Chloro-1,4-dimethoxybenzene (**6c**)<sup>17</sup>

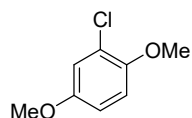

Colorless oil, 65% yield.  $^1\text{H}$  NMR (600 MHz, Chloroform-*d*)  $\delta$  6.96 (d,  $J = 3.0$  Hz, 1H), 6.86 (d,  $J = 9.0$  Hz, 1H), 6.77 (dd,  $J = 9.0, 3.0$  Hz, 1H), 3.85 (s, 3H), 3.76 (s, 3H).  $^{13}\text{C}$  NMR (150 MHz, Chloroform-*d*)  $\delta$  153.9, 149.5, 123.1, 116.3, 113.3, 113.0, 56.9, 56.0

4-Chloro-3,5-dimethyl-1-phenyl-1H-pyrazole (**6d**)<sup>14</sup>

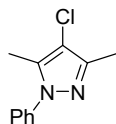

Yellow oil, 77% yield.  $^1\text{H}$  NMR (600 MHz, Chloroform-*d*)  $\delta$  7.47 – 7.35 (m, 5H), 2.29 (d,  $J = 2.8$  Hz, 6H).  $^{13}\text{C}$  NMR (150 MHz, Chloroform-*d*)  $\delta$  146.1, 139.8, 135.8, 129.3, 127.8, 124.6, 109.9, 11.5, 10.9.

## 9. Copies of NMR spectra

### <sup>1</sup>H NMR spectra for compound (2a)

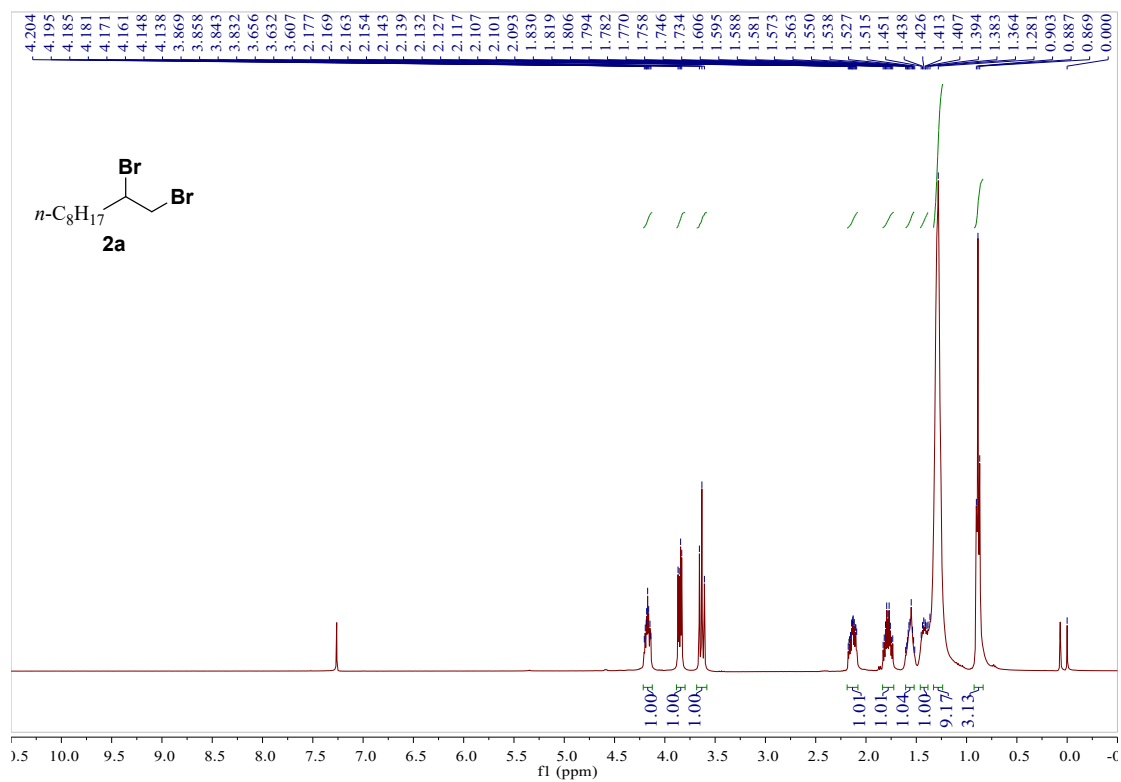

### <sup>13</sup>C NMR spectra for compound (2a)

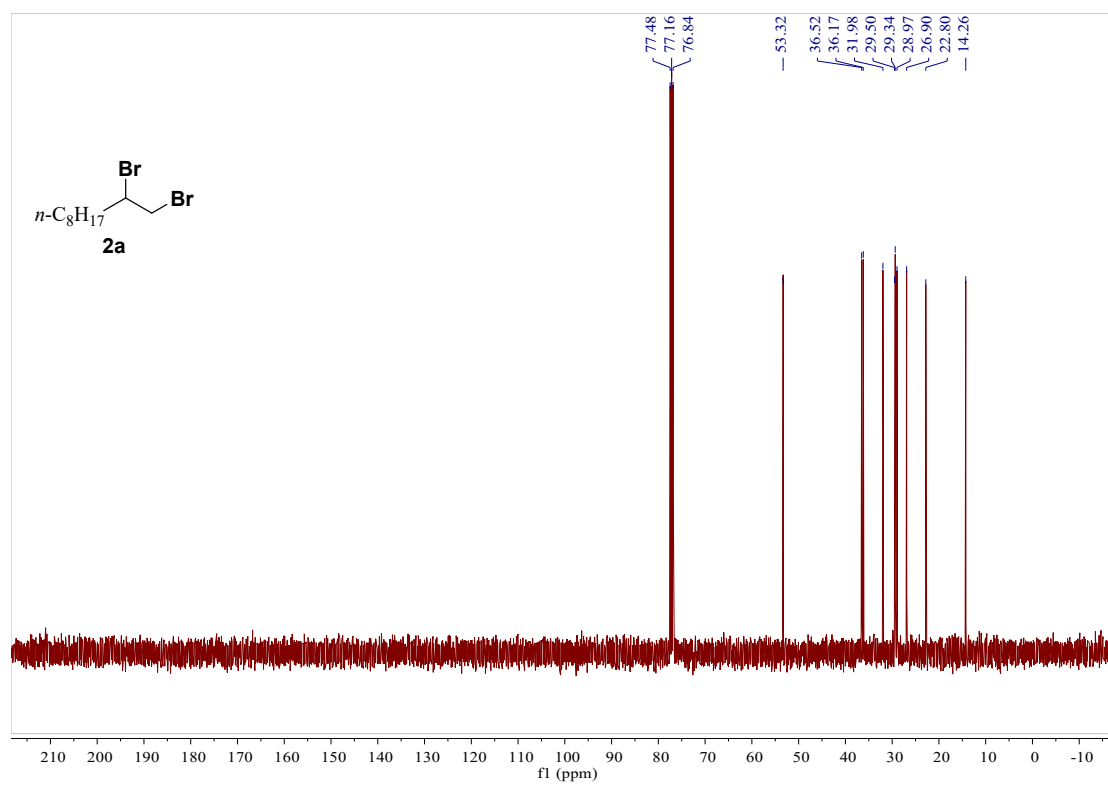



### <sup>1</sup>H NMR spectra for compound 2b

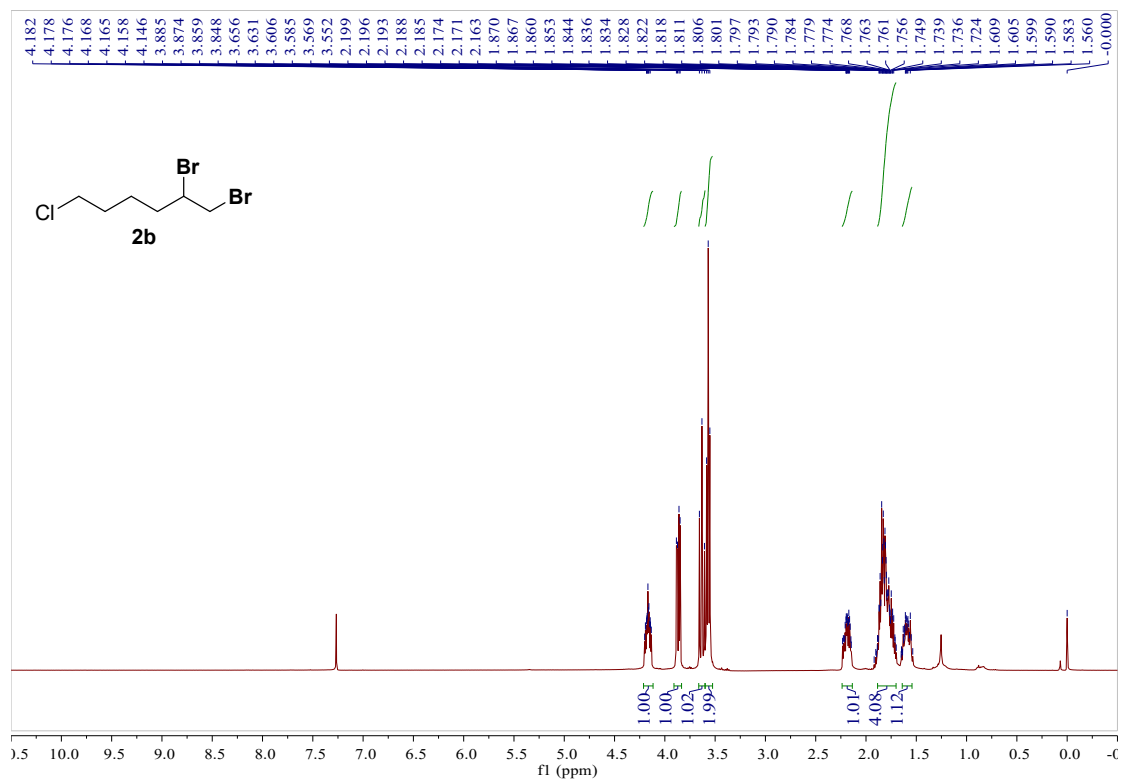

### <sup>13</sup>C NMR spectra for compound (2b)

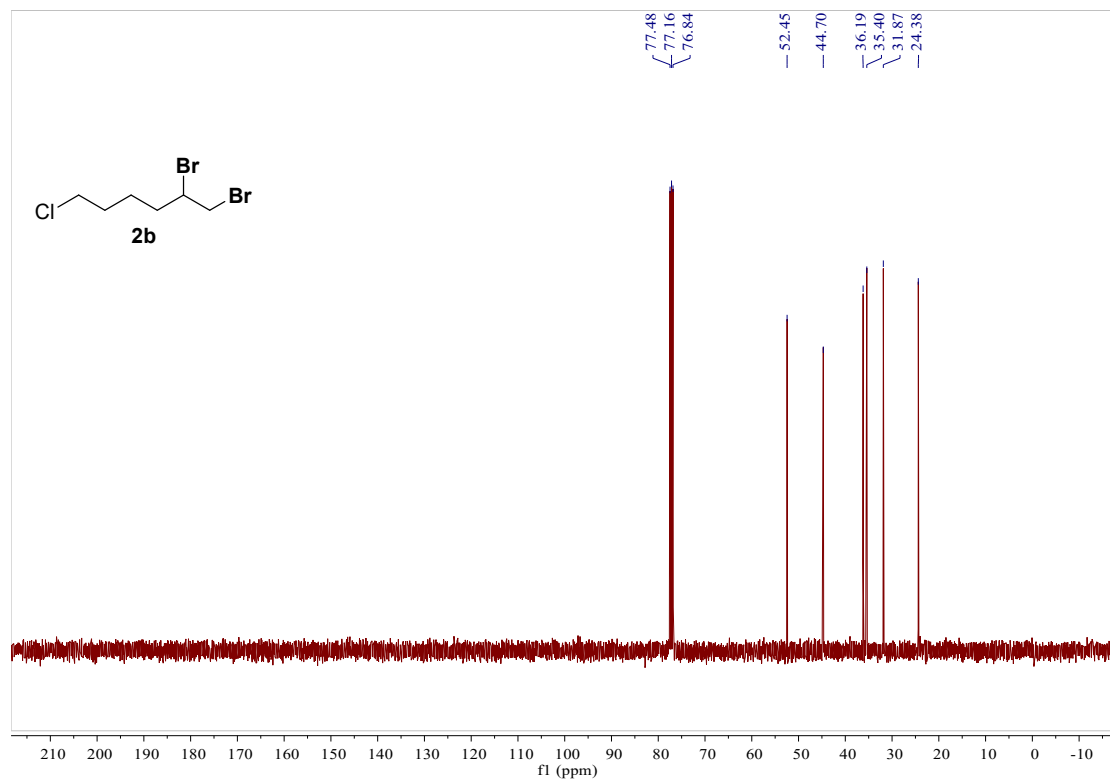

### <sup>1</sup>H NMR spectra for compound (2c)

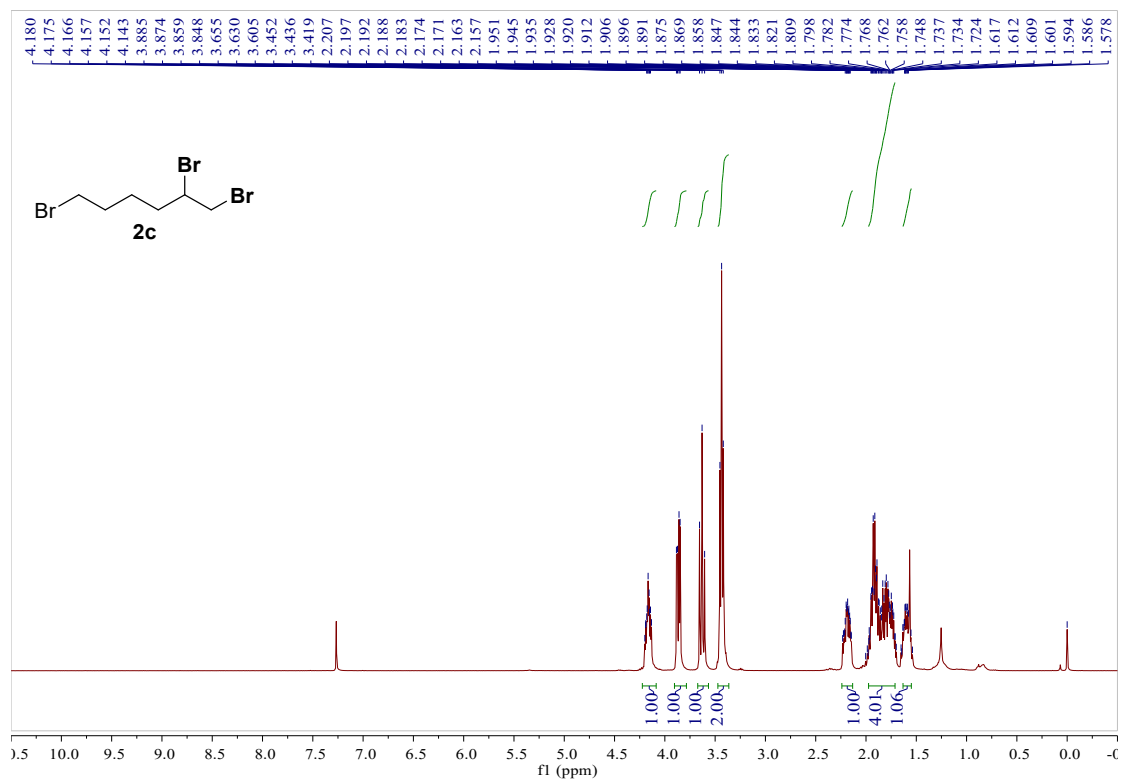

### <sup>13</sup>C NMR spectra for compound (2c)

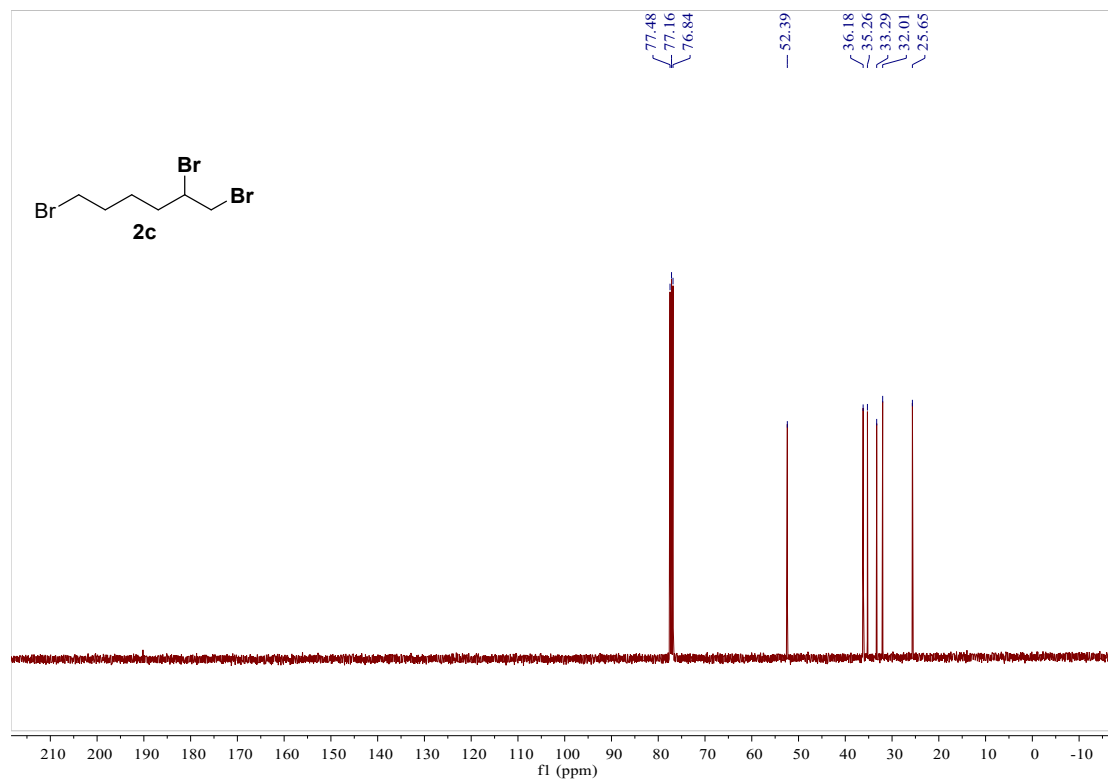

### <sup>1</sup>H NMR spectra for compound (2d)

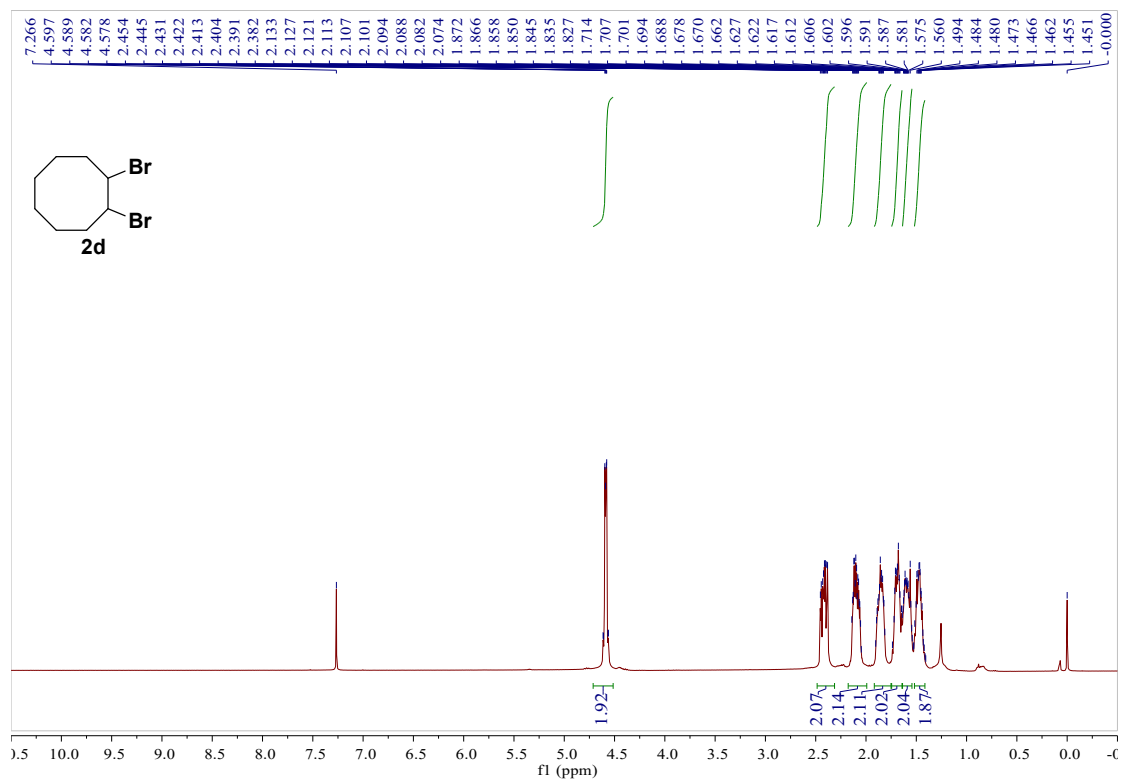

### <sup>13</sup>C NMR spectra for compound (2d)

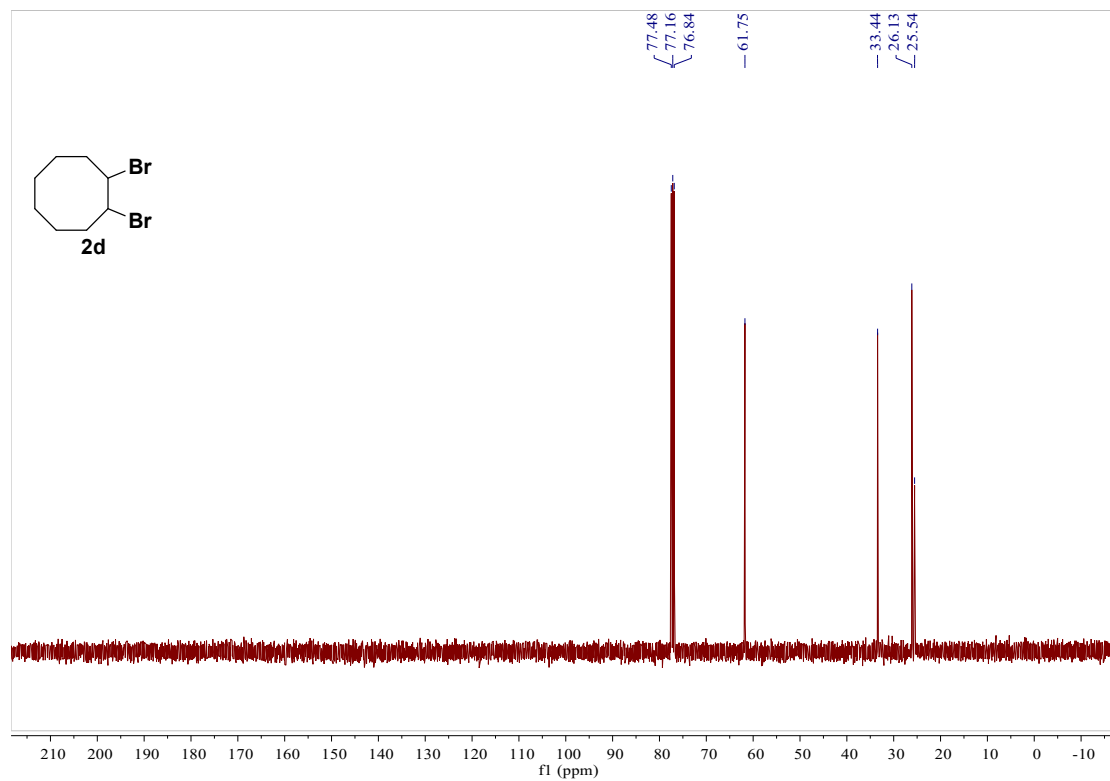

### <sup>1</sup>H NMR spectra for compound (2e)

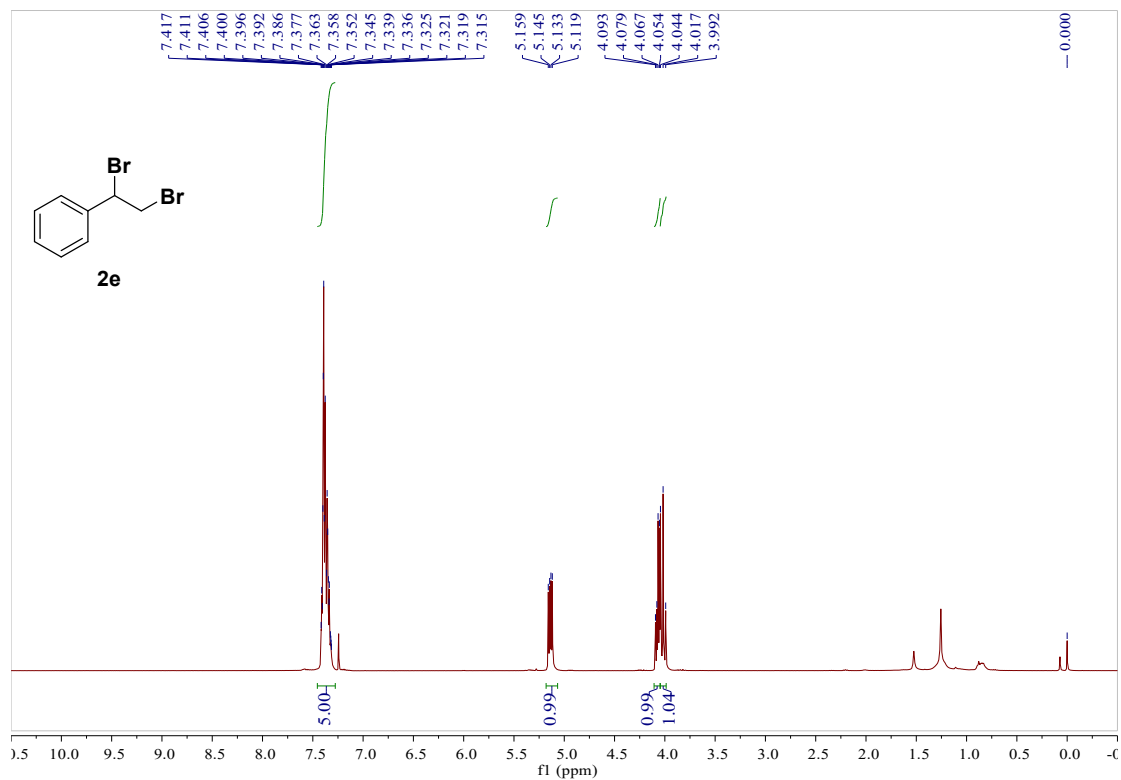

### <sup>13</sup>C NMR spectra for compound (2e)

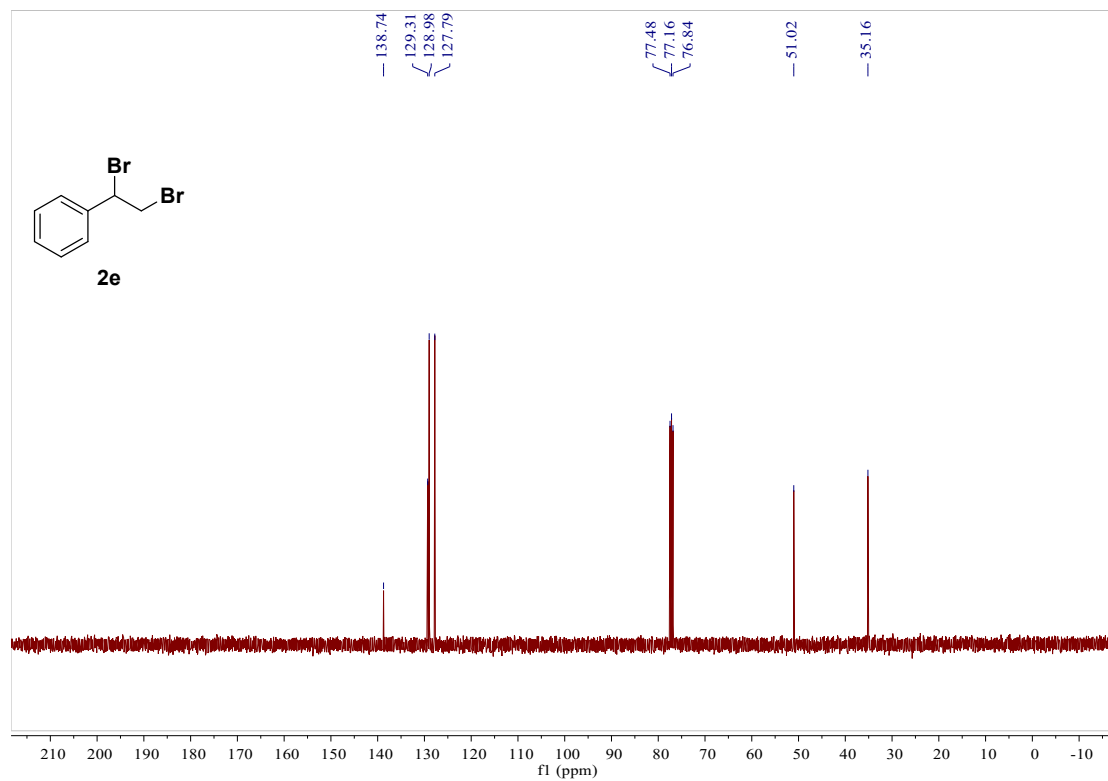

### <sup>1</sup>H NMR spectra for compound (2f)

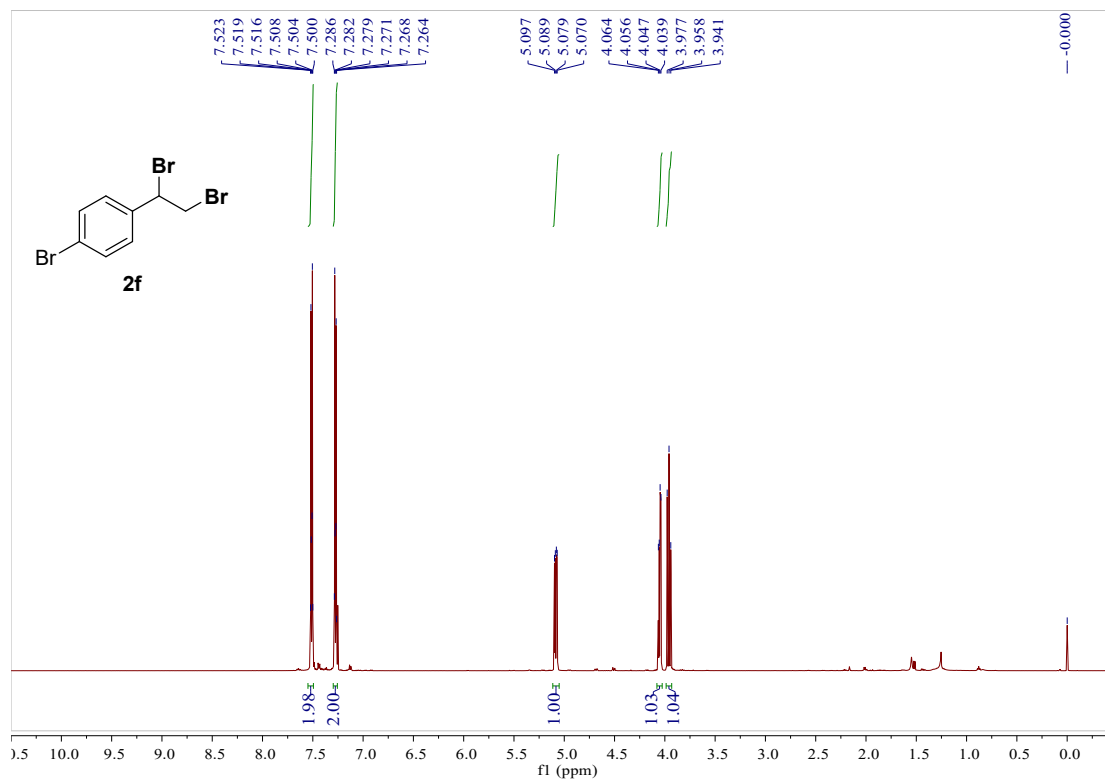

### <sup>13</sup>C NMR spectra for compound (2f)

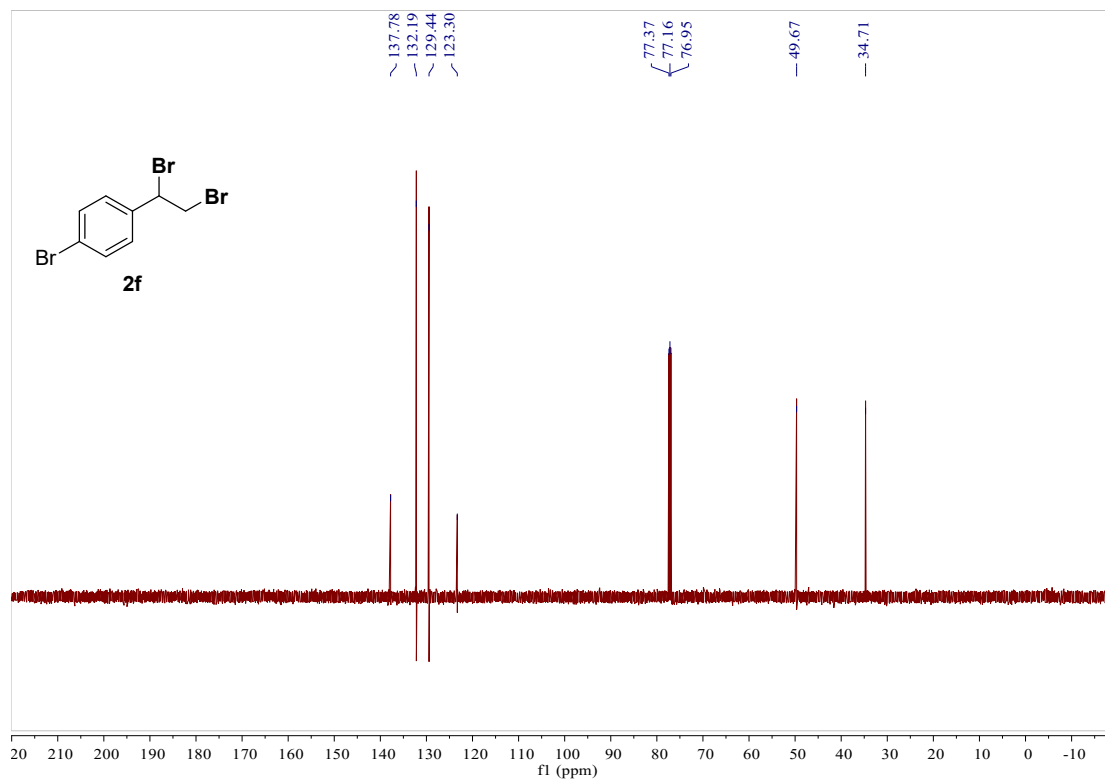

### <sup>1</sup>H NMR spectra for compound (2g)

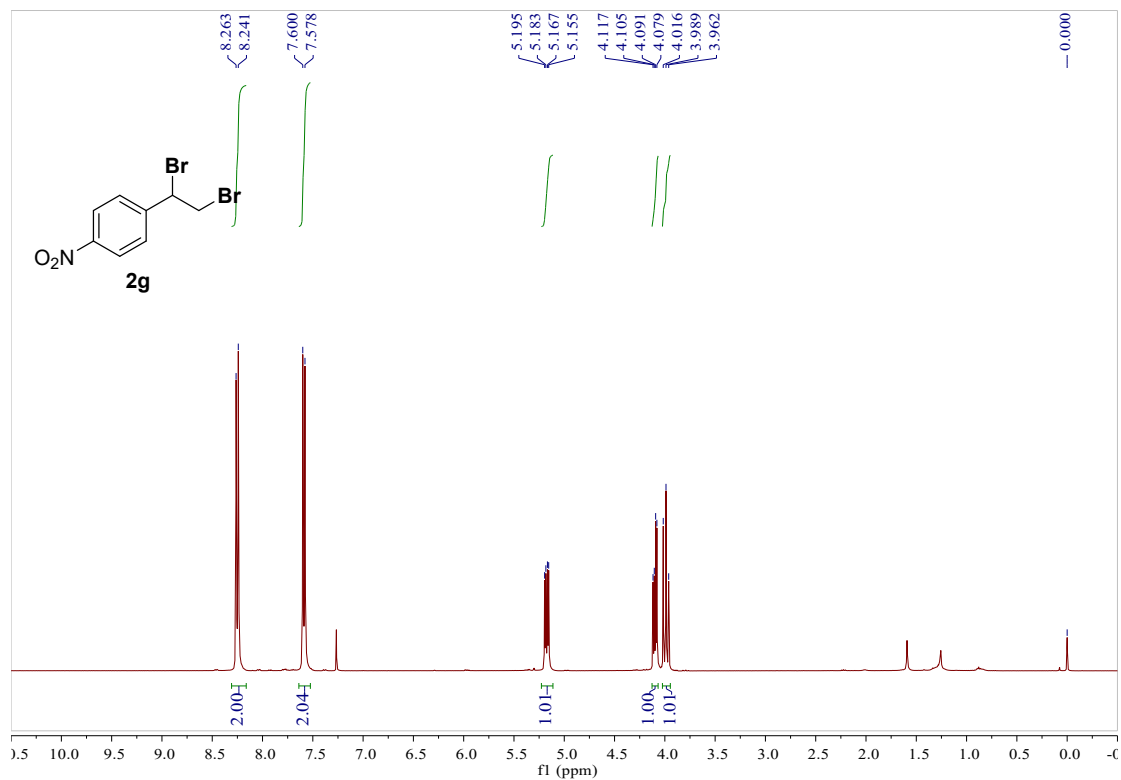

### <sup>13</sup>C NMR spectra for compound (2g)

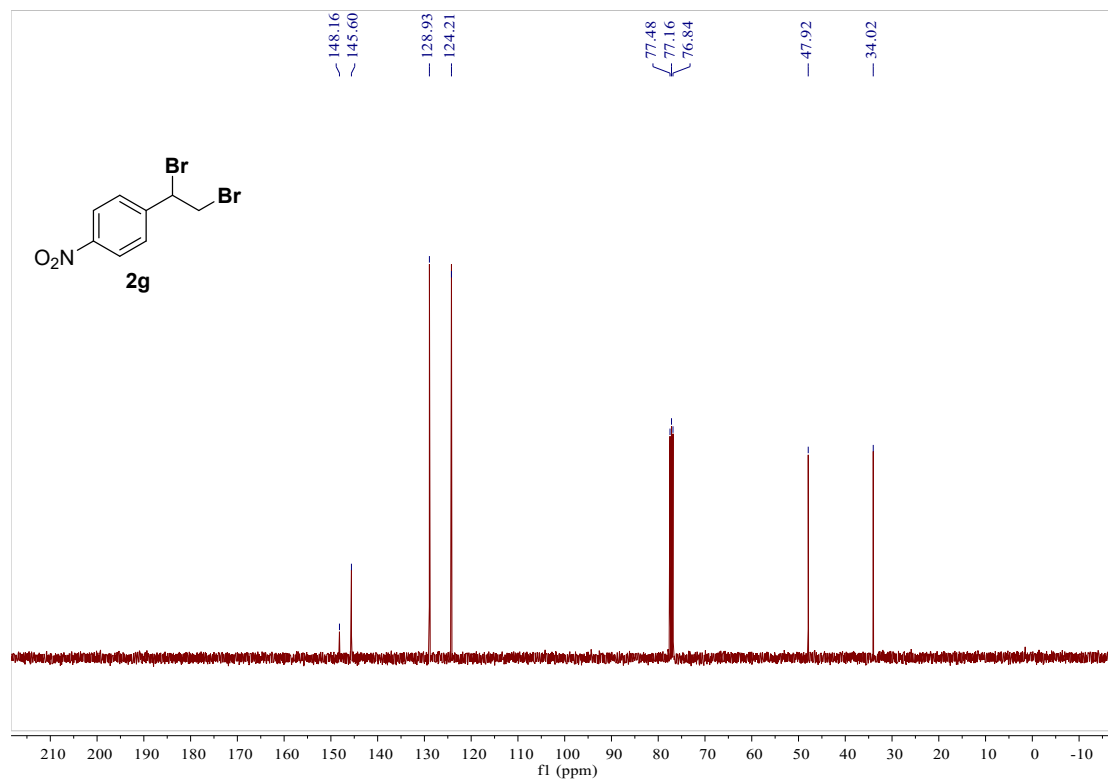

### <sup>1</sup>H NMR spectra for compound (2h)

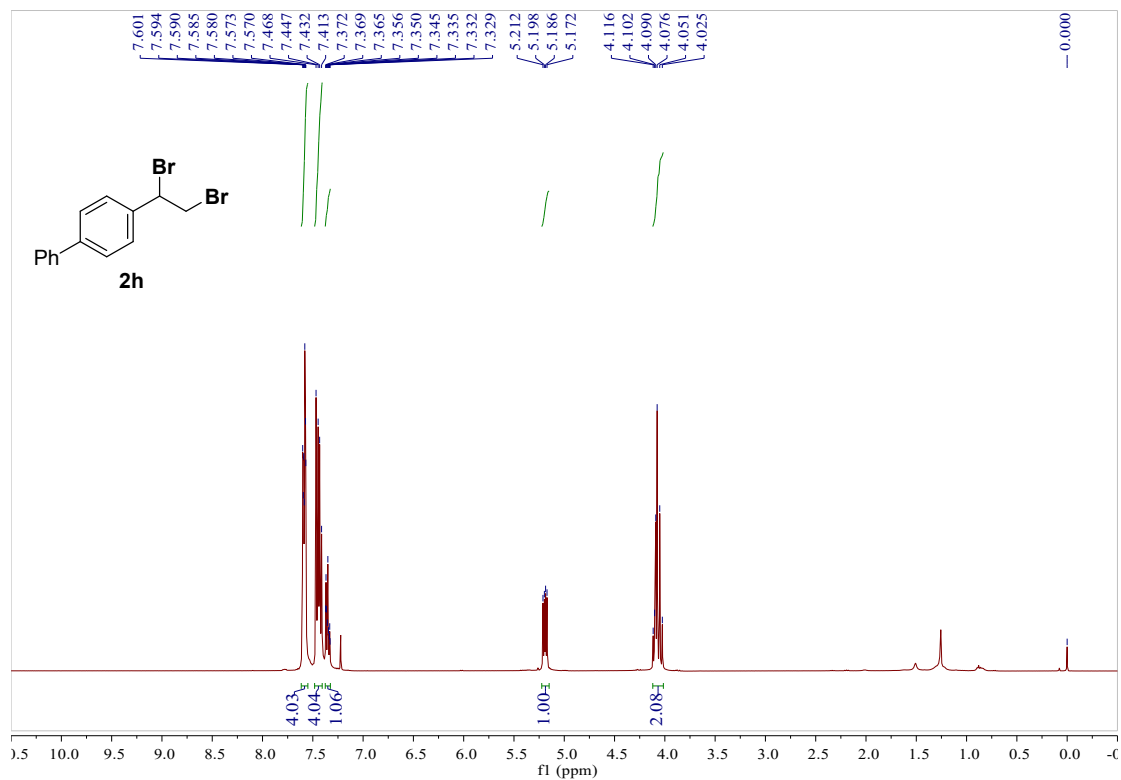

### <sup>13</sup>C NMR spectra for compound (2h)

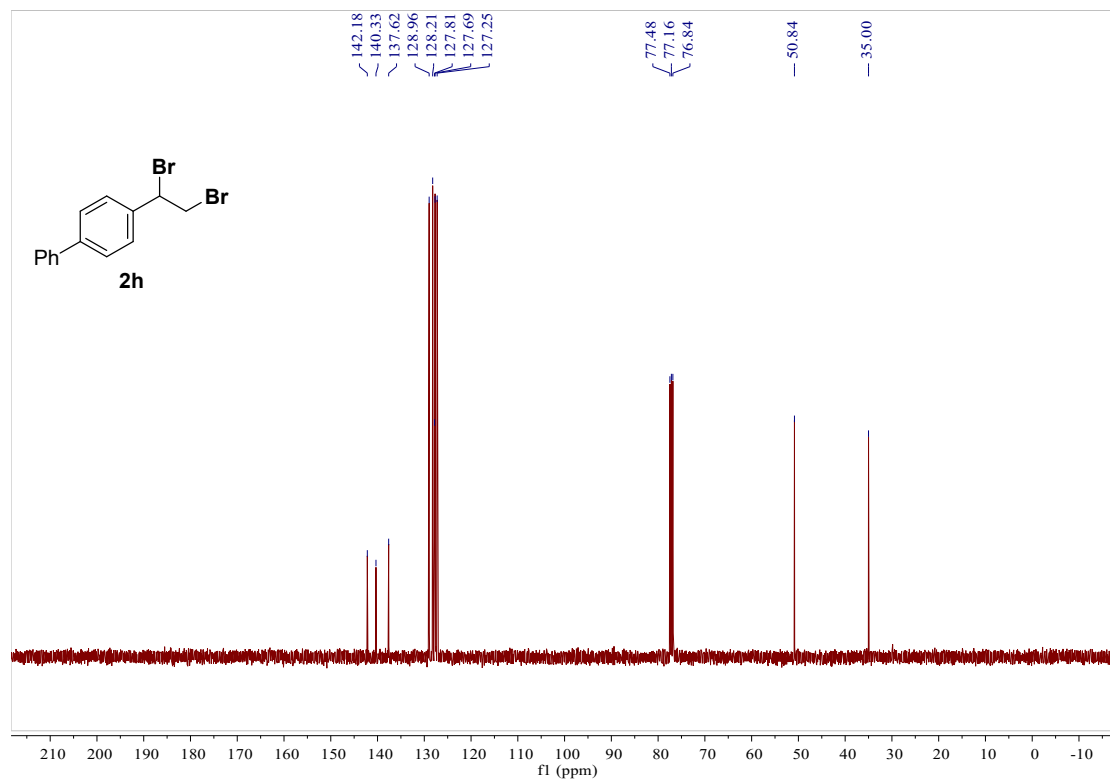

### <sup>1</sup>H NMR spectra for compound (2i)

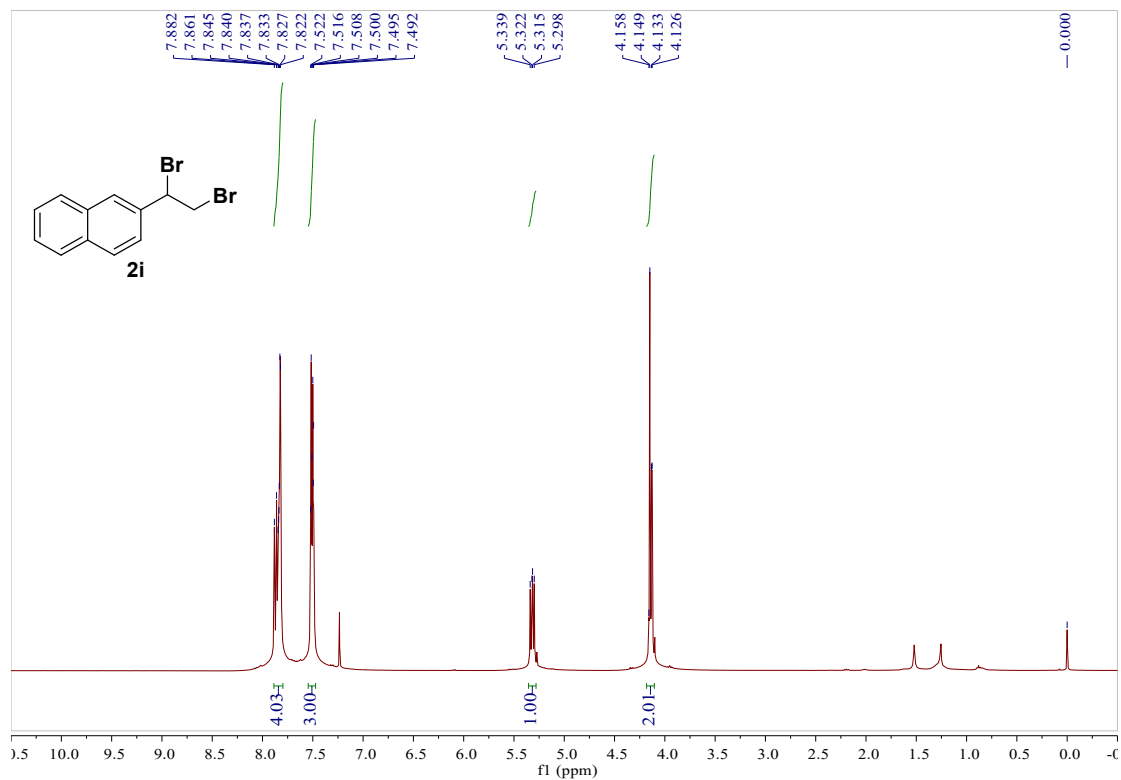

### <sup>13</sup>C NMR spectra for compound (2i)

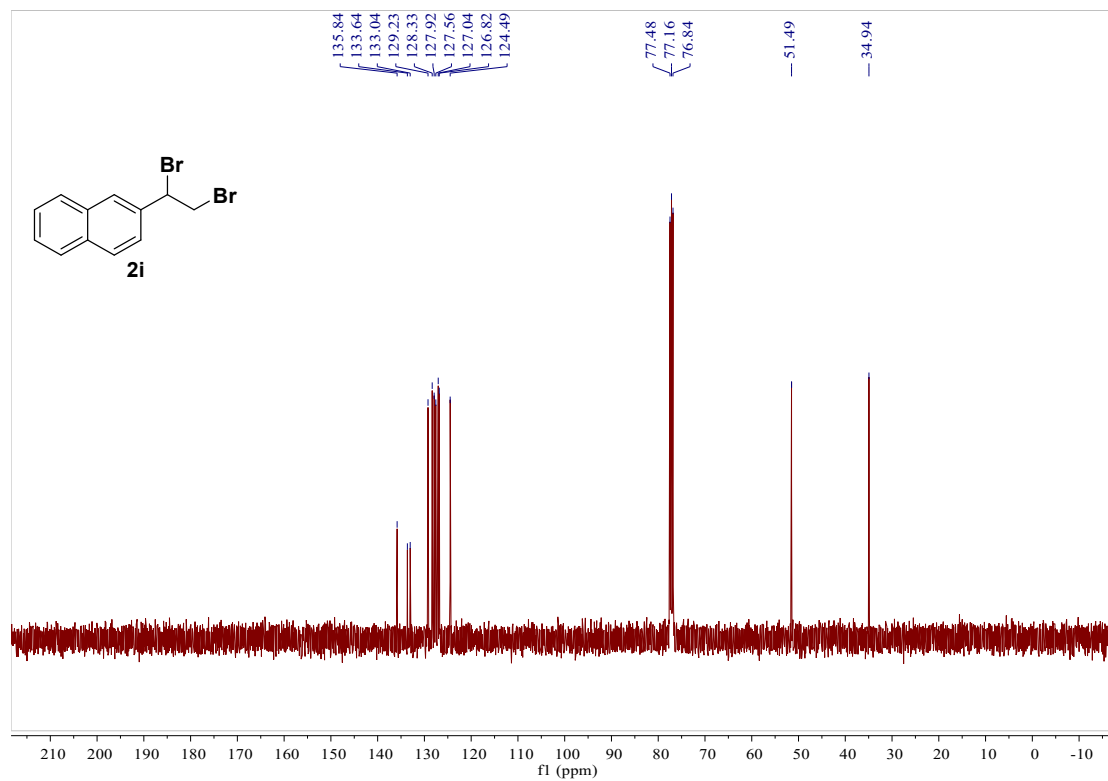



### <sup>1</sup>H NMR spectra for compound (2k)

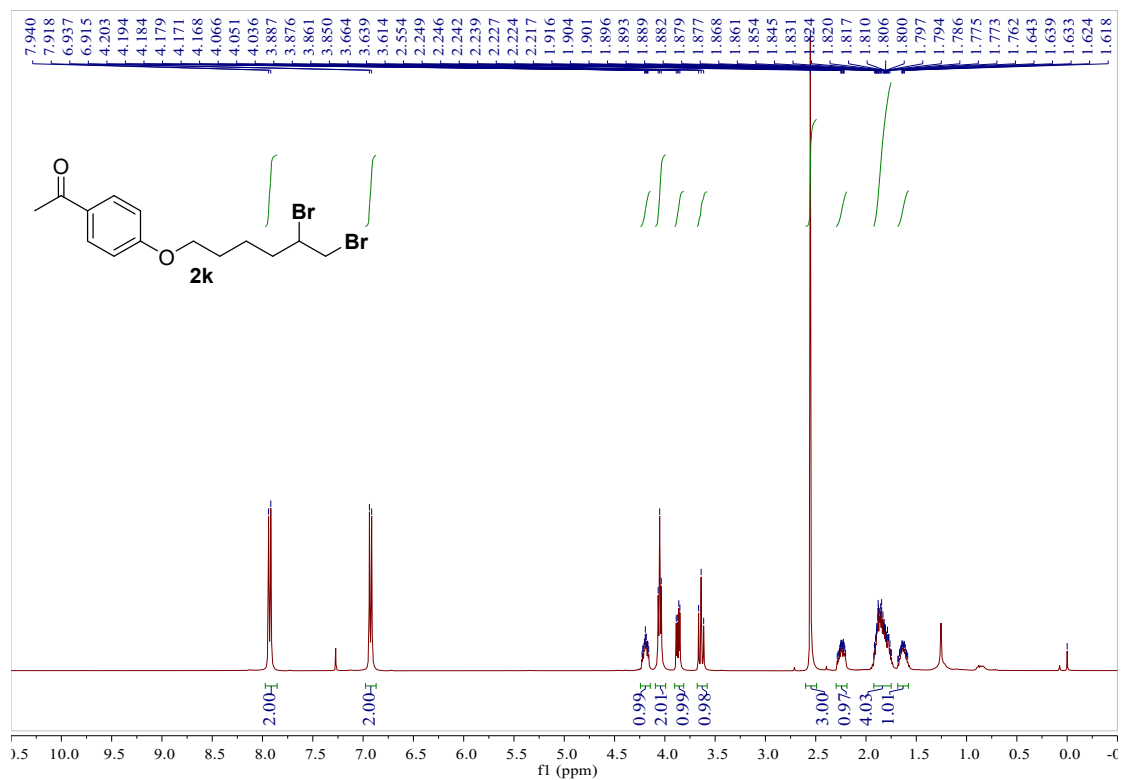

### <sup>13</sup>C NMR spectra for compound (2k)

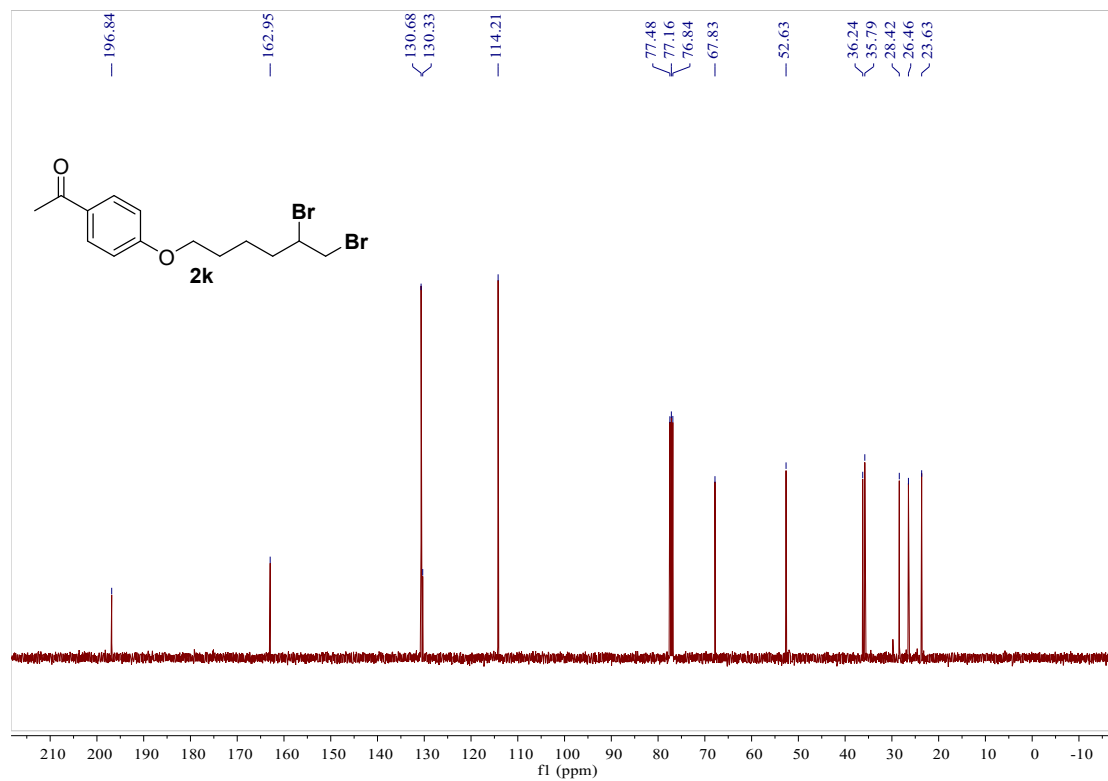

**<sup>1</sup>H NMR spectra for compound (2I)**

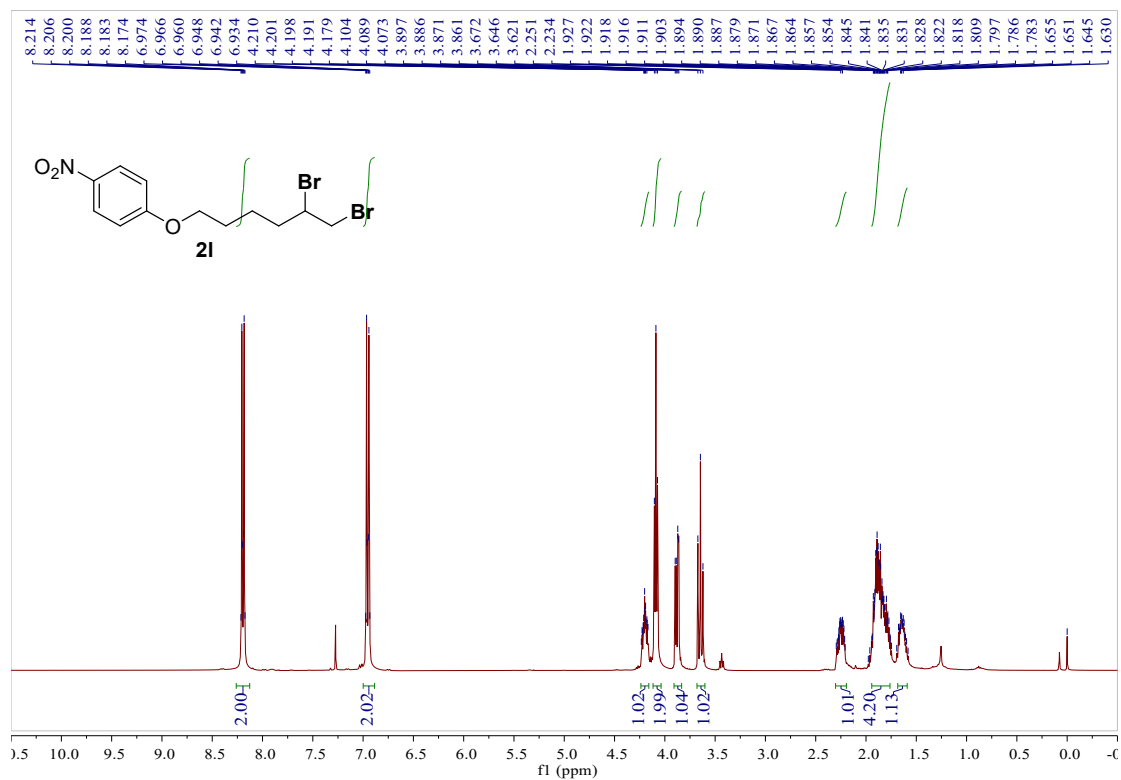

**<sup>13</sup>C NMR spectra for compound (2I)**

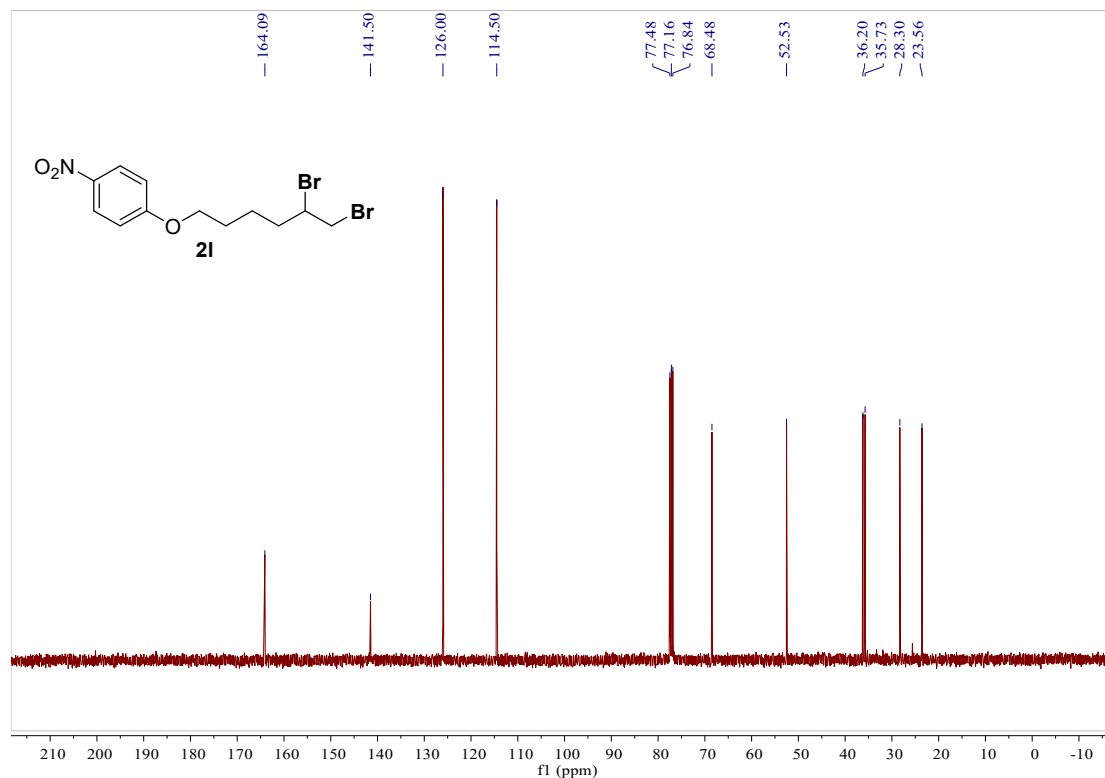

### <sup>1</sup>H NMR spectra for compound (2m)

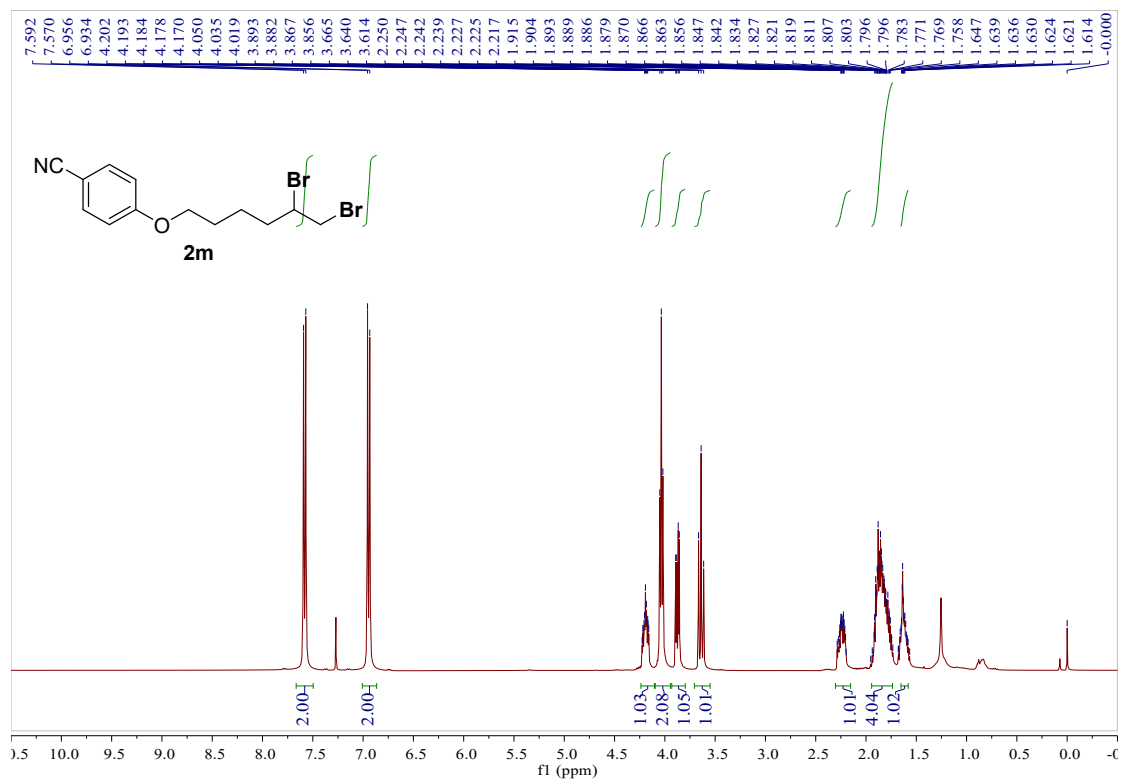

### <sup>13</sup>C NMR spectra for compound (2m)

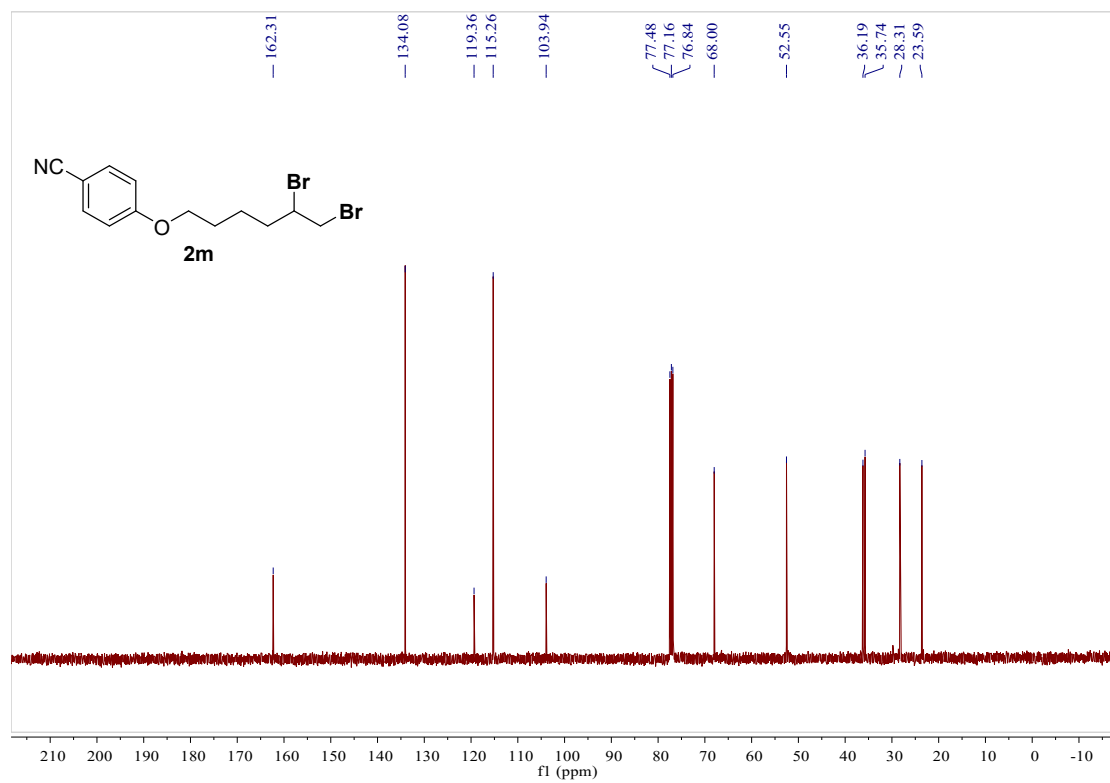

### <sup>1</sup>H NMR spectra for compound (2n)

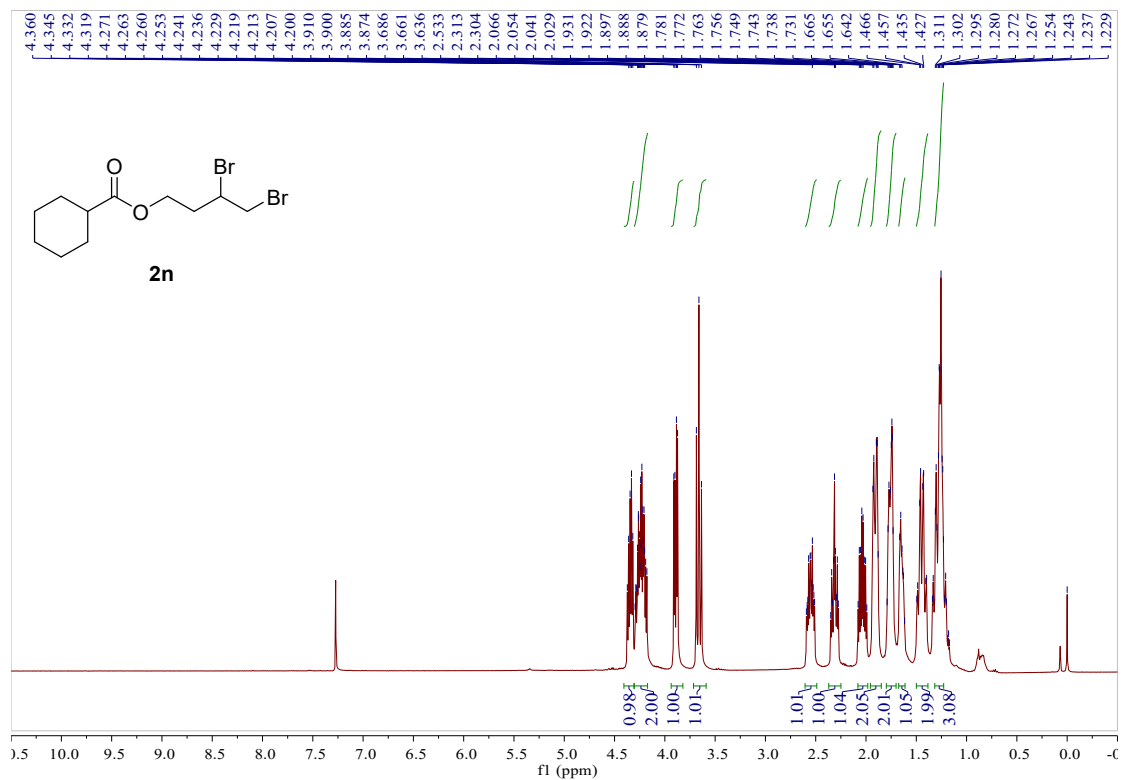

### <sup>13</sup>C NMR spectra for compound (2n)

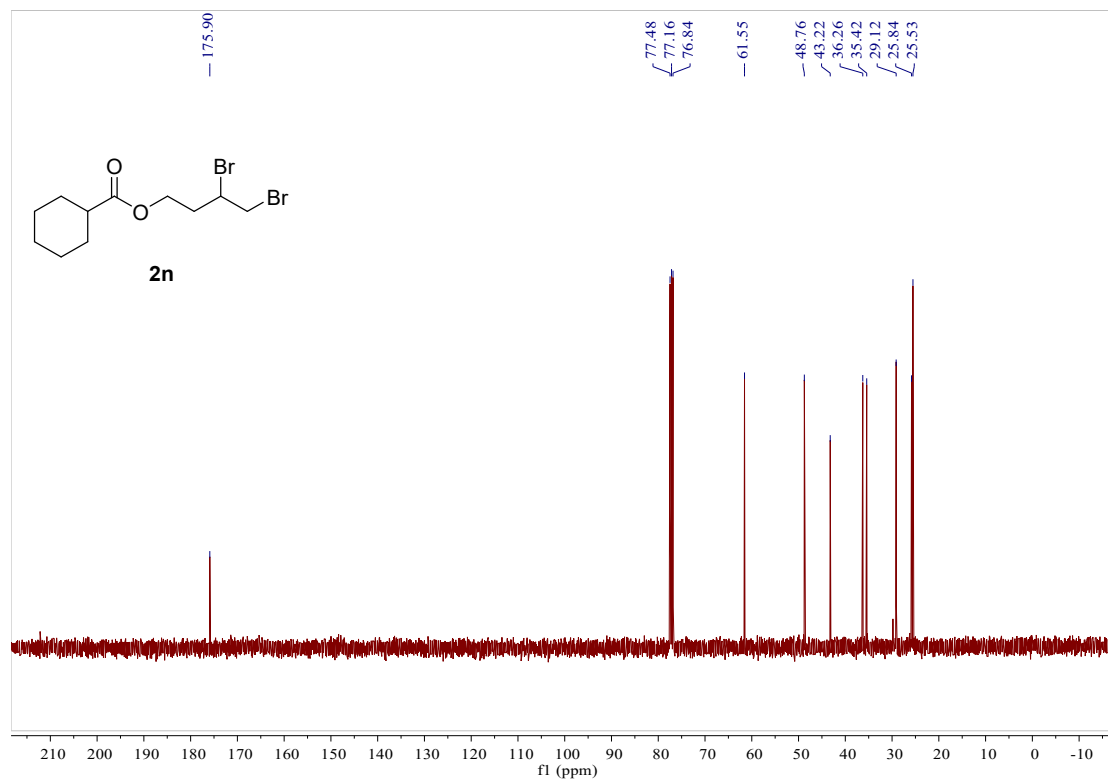

### <sup>1</sup>H NMR spectra for compound (2o)

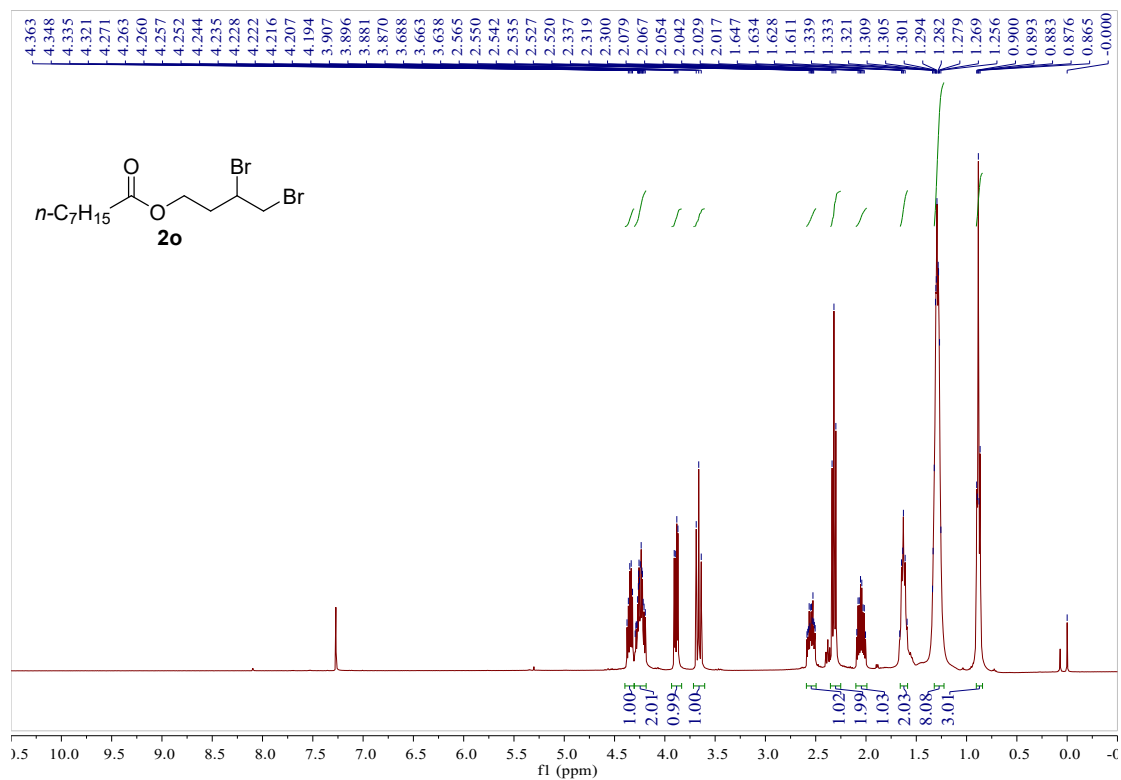

### <sup>13</sup>C NMR spectra for compound (2o)

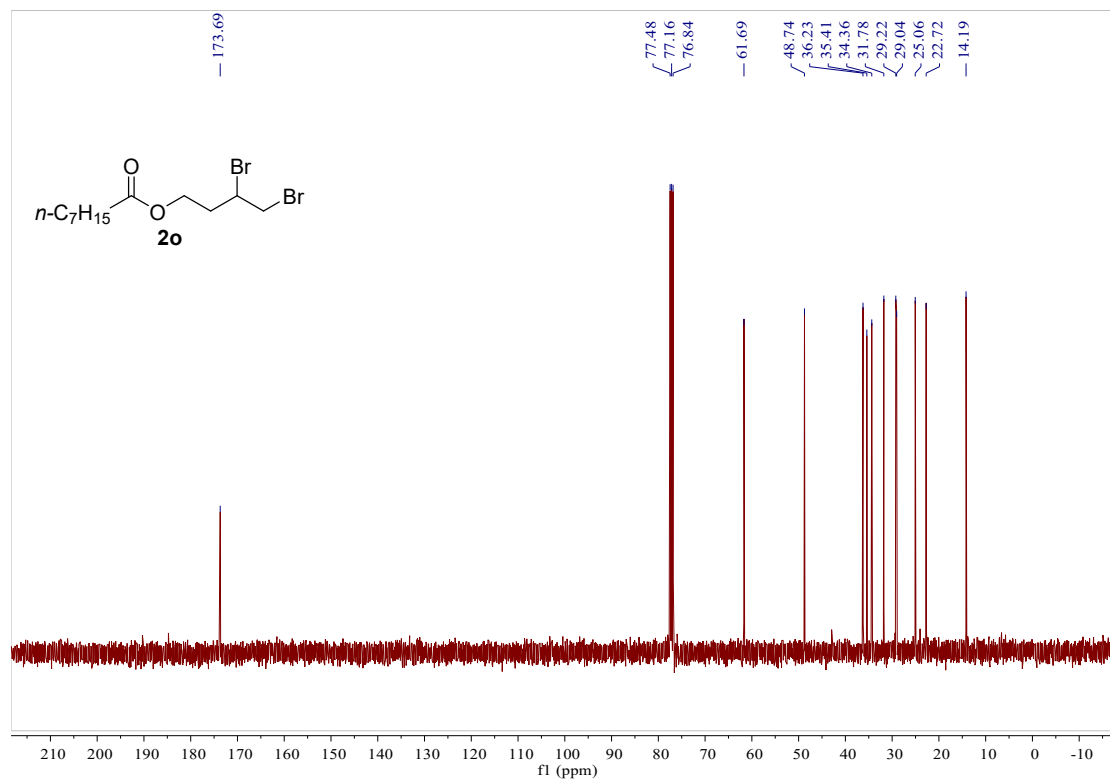

### <sup>1</sup>H NMR spectra for compound (2p)

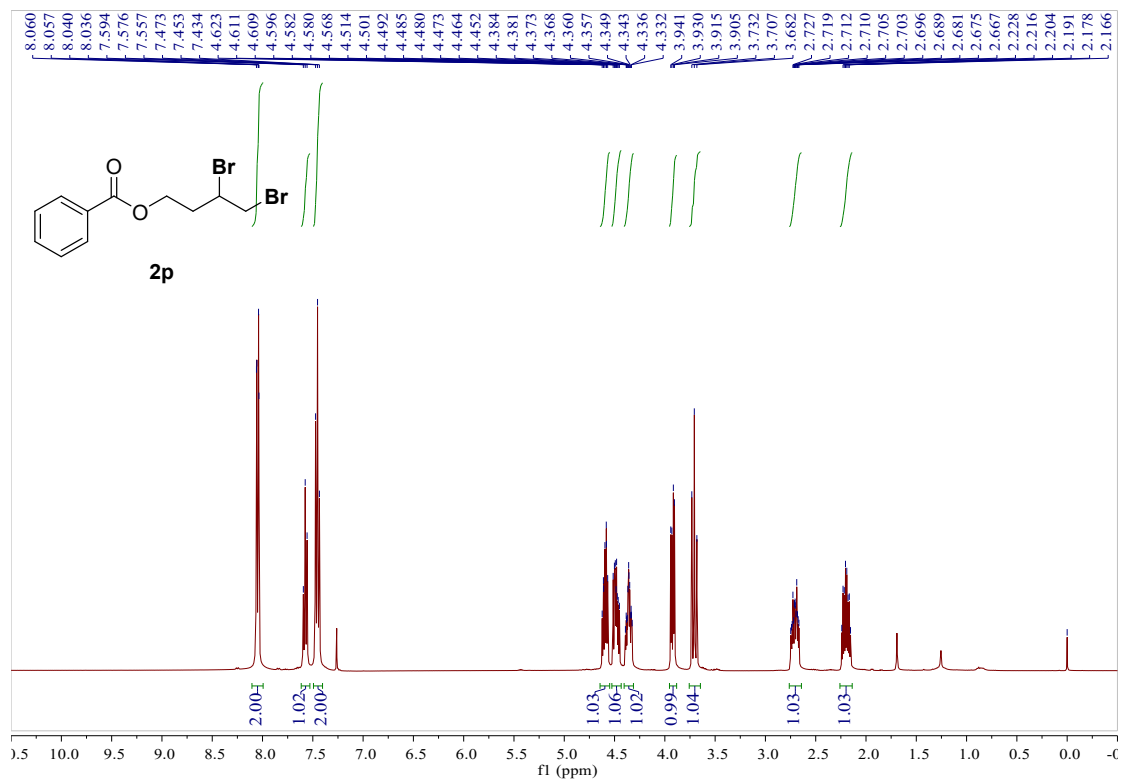

### <sup>13</sup>C NMR spectra for compound (2p)

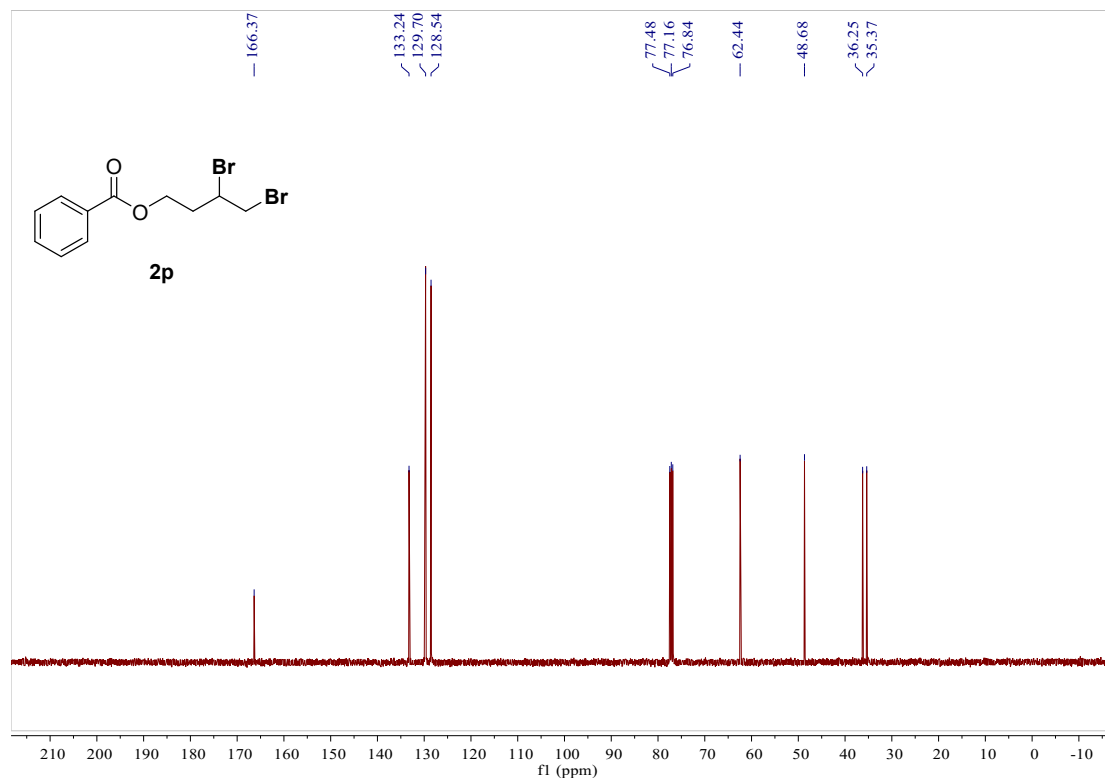

### <sup>1</sup>H NMR spectra for compound (2q)

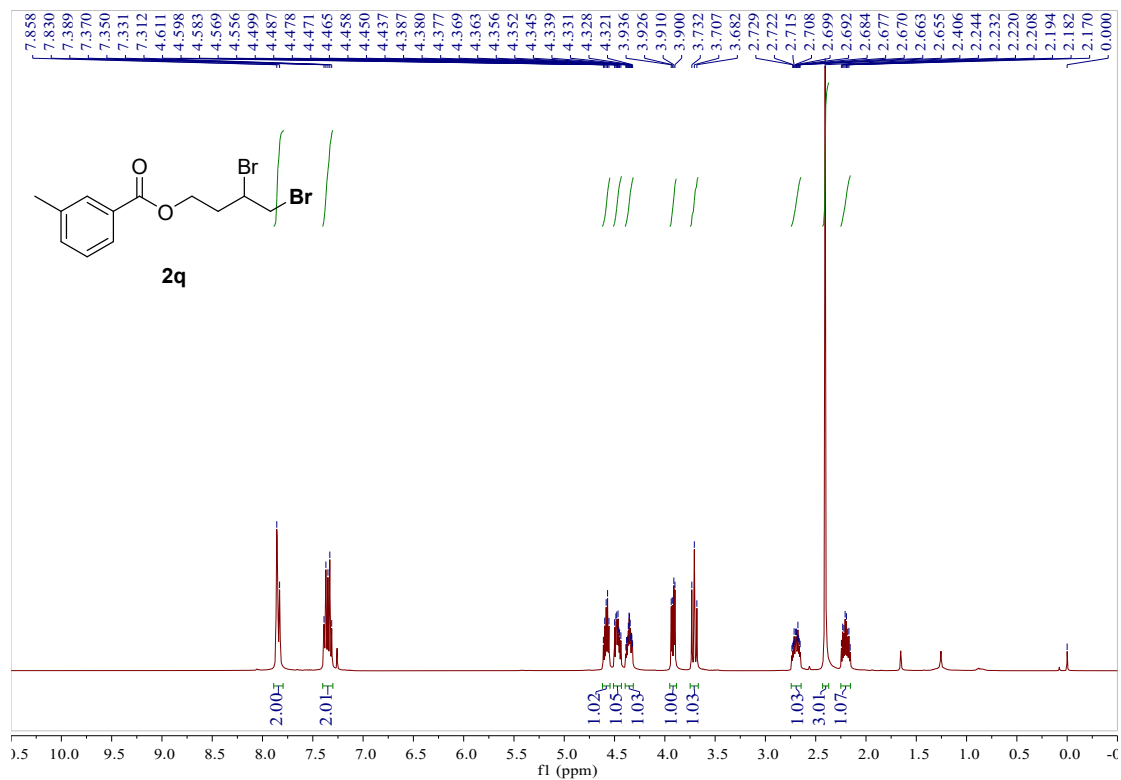

### <sup>13</sup>C NMR spectra for compound (2q)

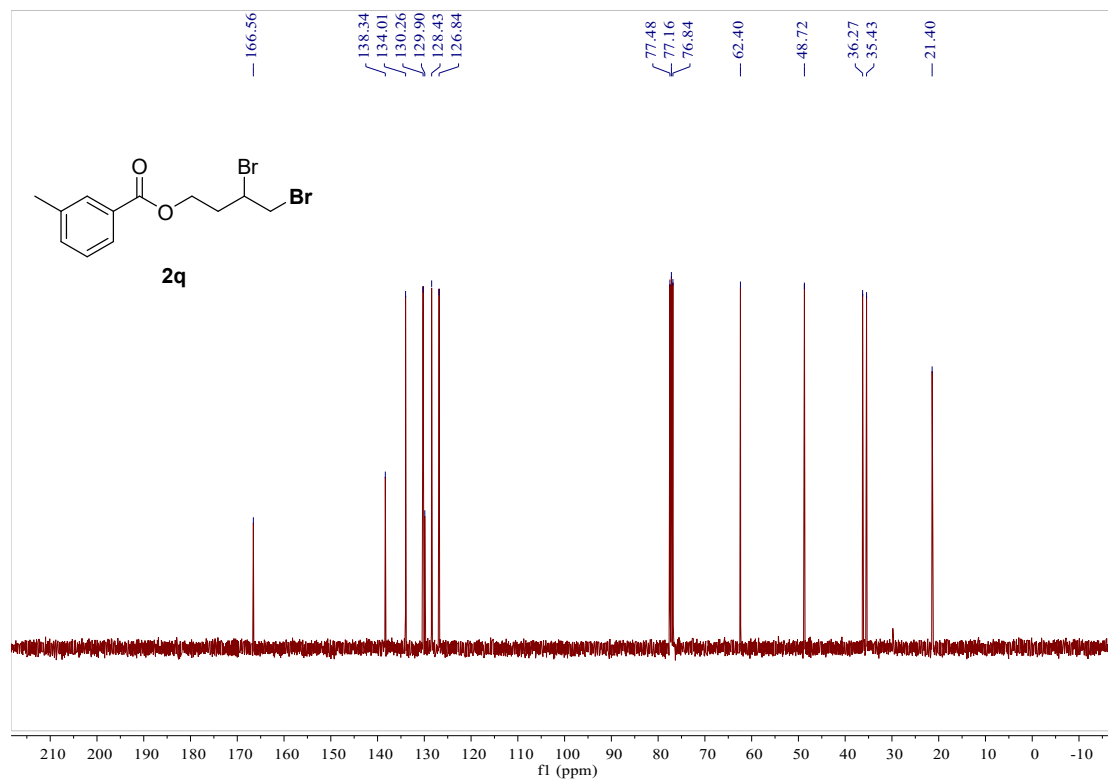

### <sup>1</sup>H NMR spectra for compound (2r)

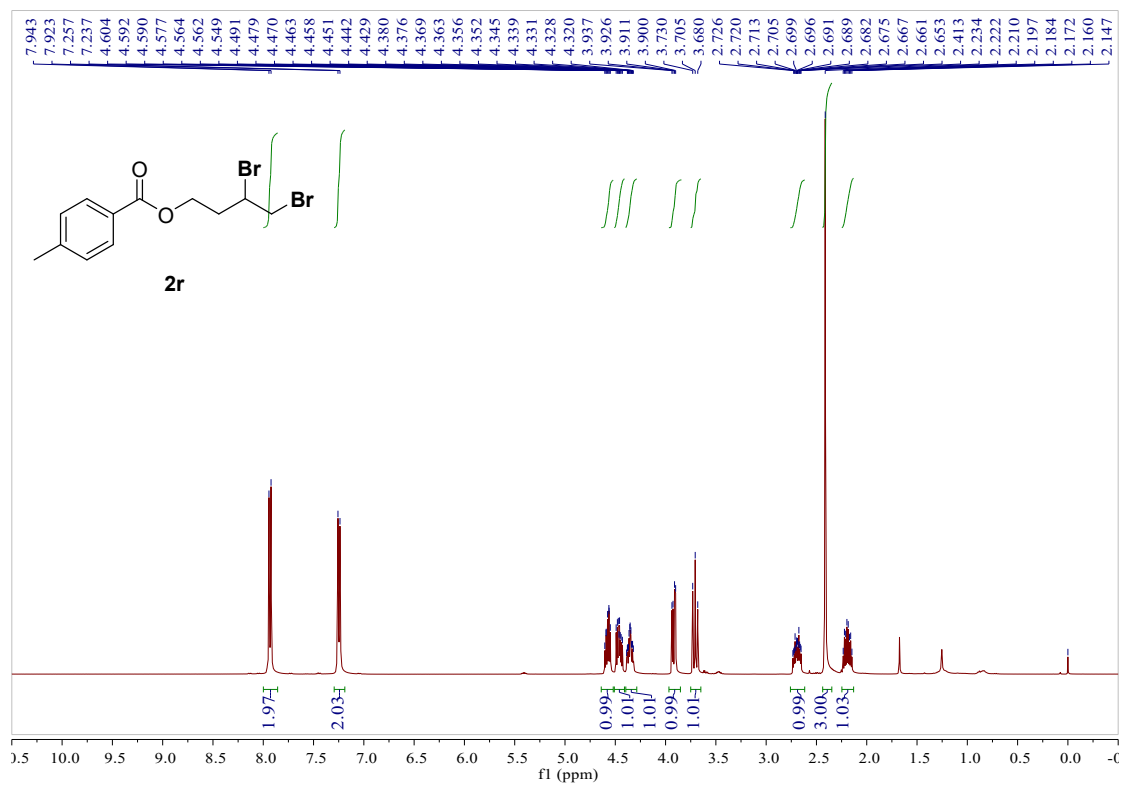

### <sup>13</sup>C NMR spectra for compound (2r)

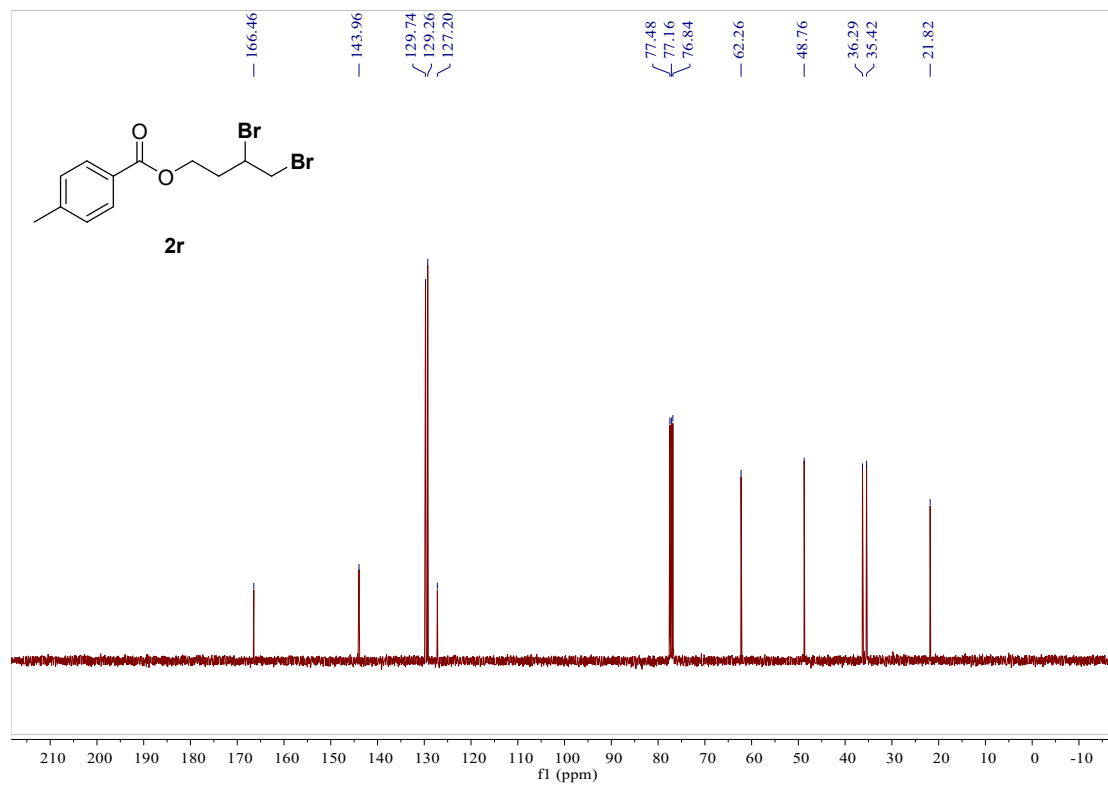



### <sup>1</sup>H NMR spectra for compound (2s)

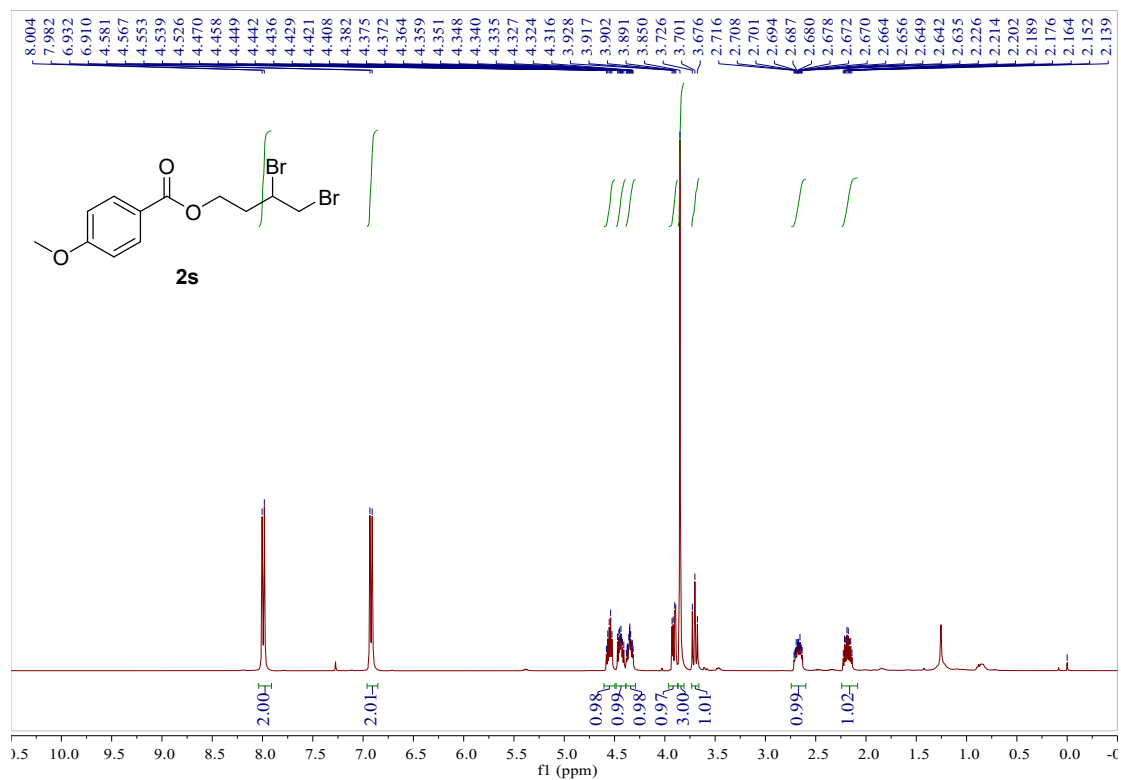

### <sup>13</sup>C NMR spectra for compound (2s)

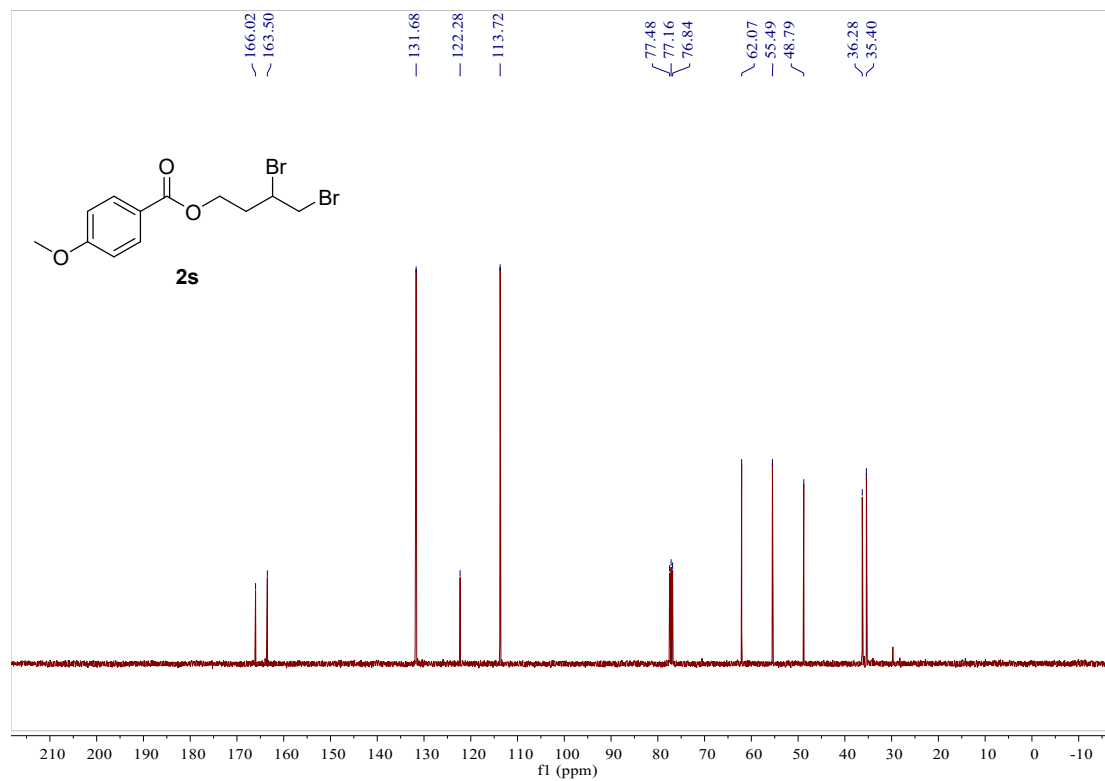

### <sup>1</sup>H NMR spectra for compound (2t)

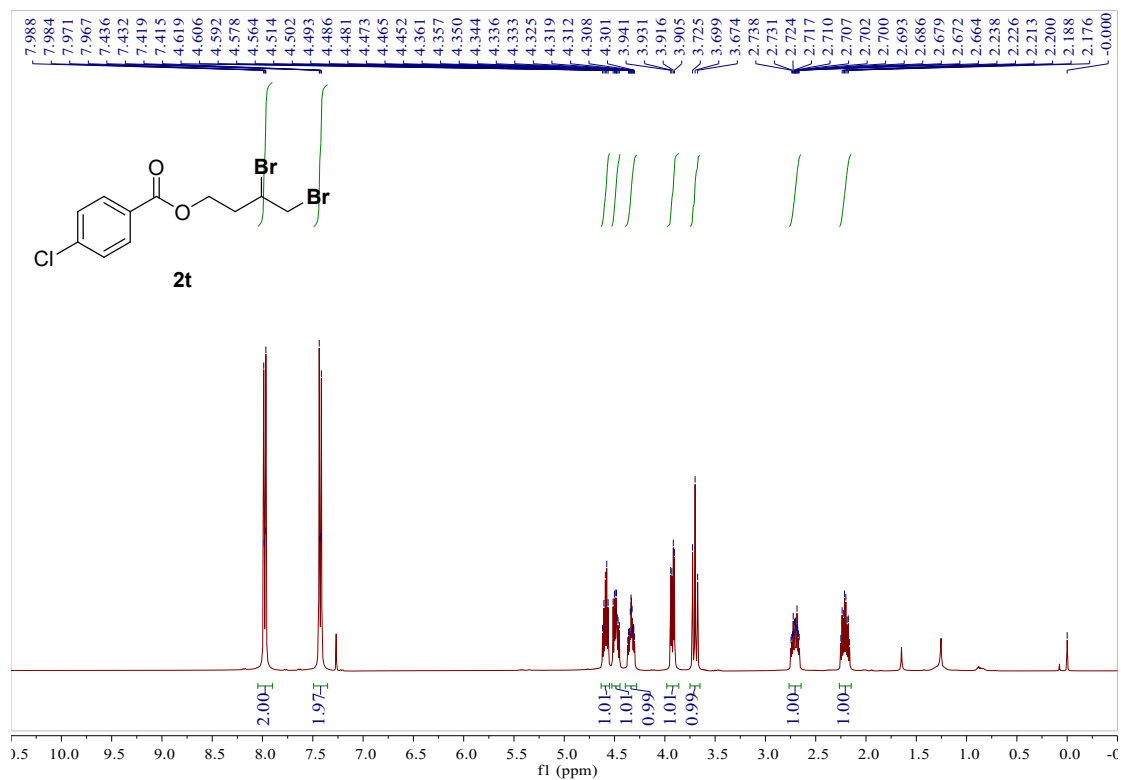

### <sup>13</sup>C NMR spectra for compound (2t)

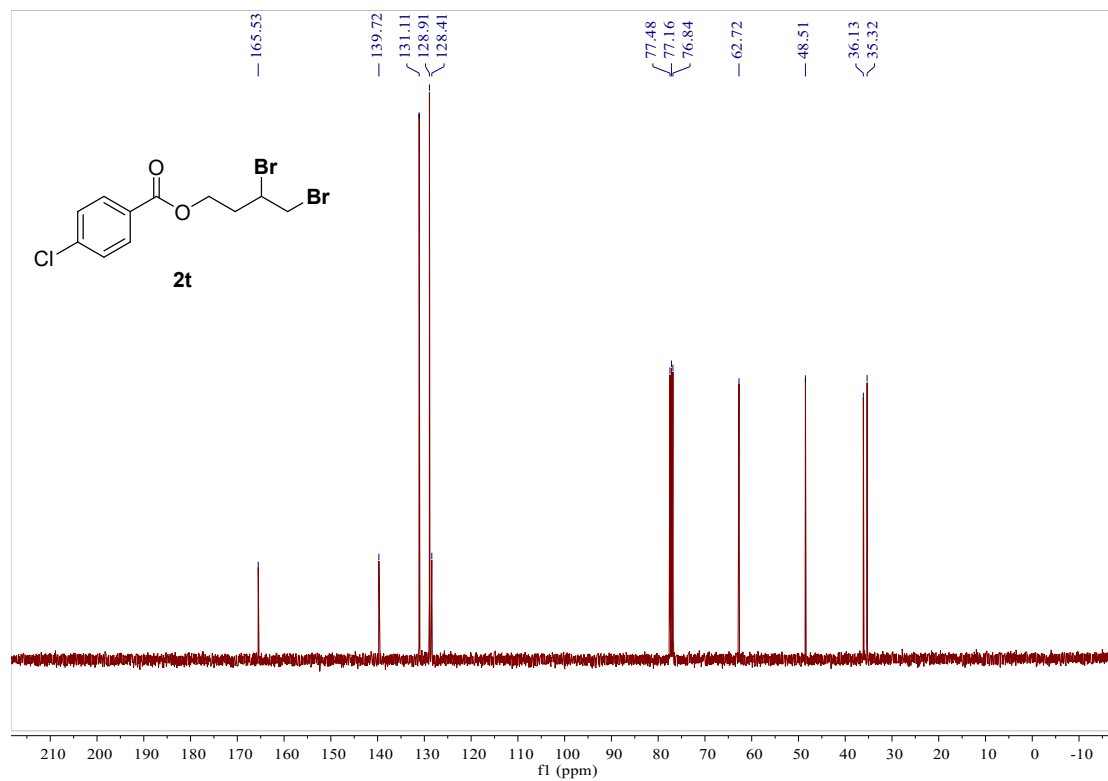

### <sup>1</sup>H NMR spectra for compound (2u)

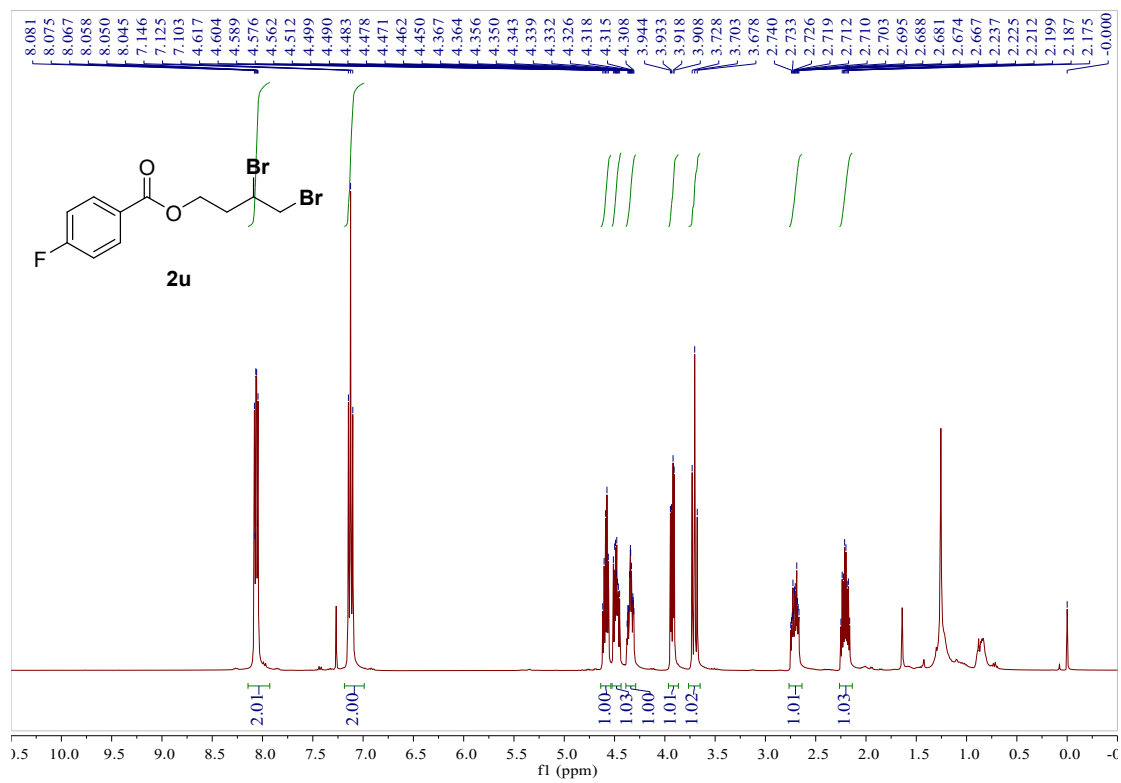

### <sup>19</sup>F NMR spectra for compound (2u)

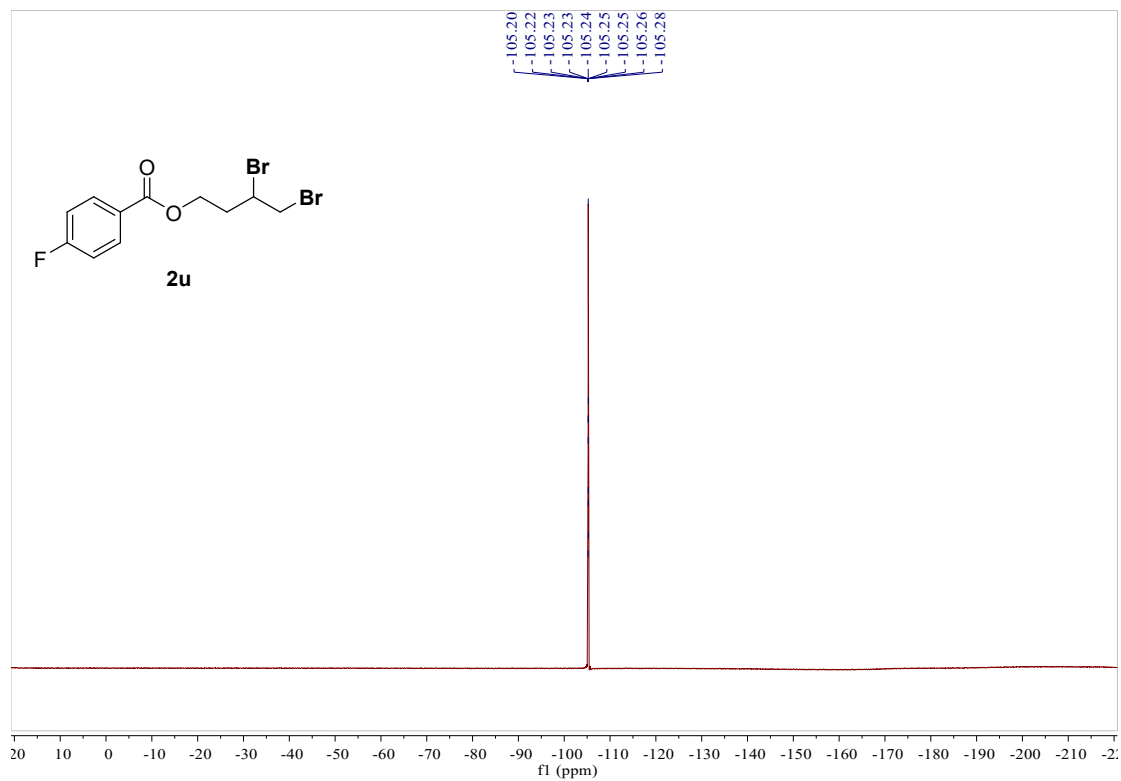

### <sup>13</sup>C NMR spectra for compound (2u)

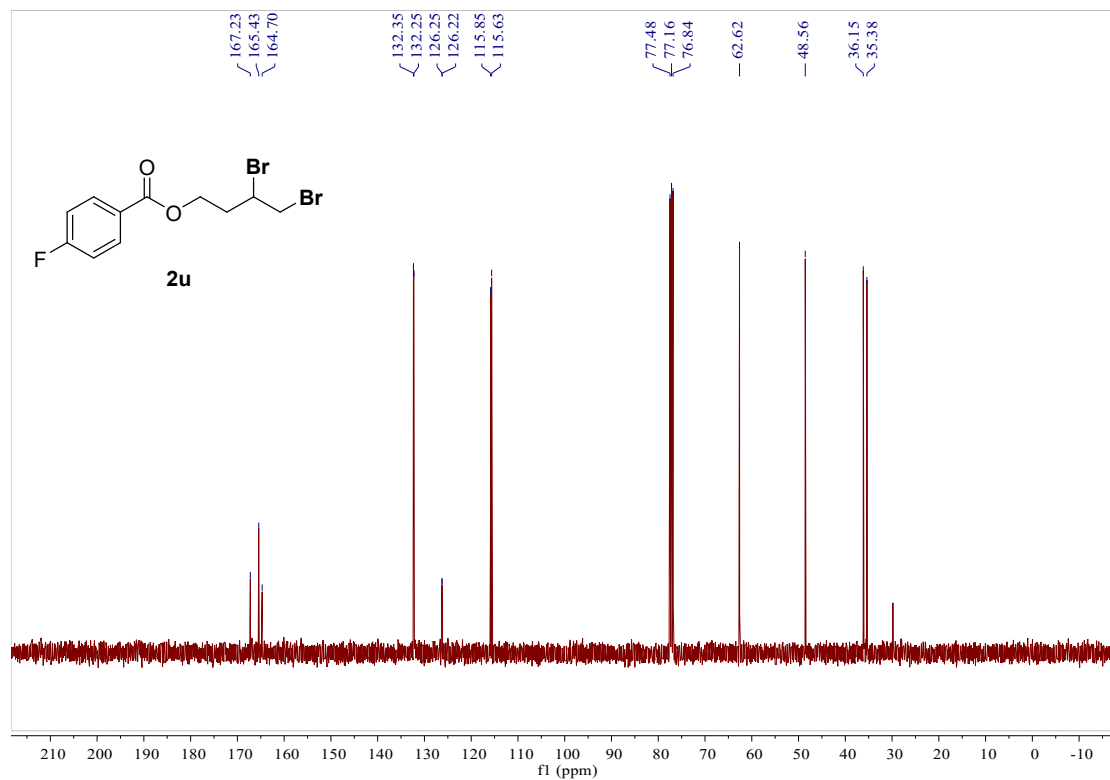

### <sup>1</sup>H NMR spectra for compound (2v)

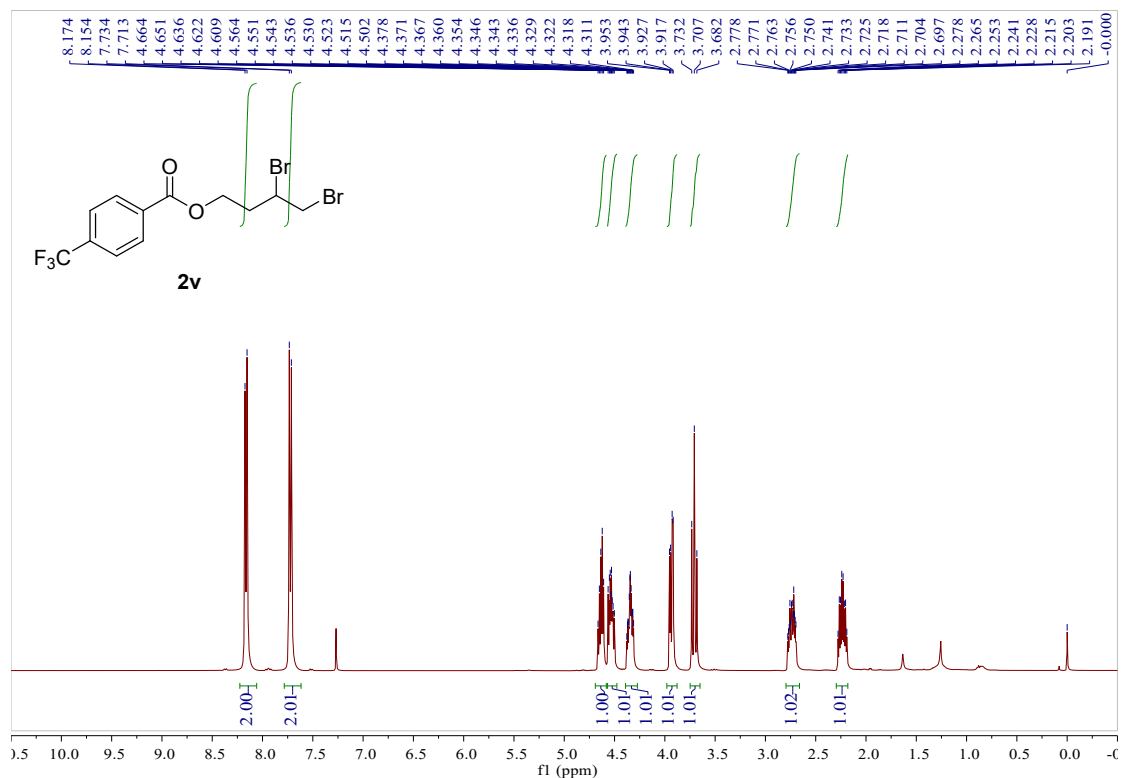

### <sup>19</sup>F NMR spectra for compound (2v)

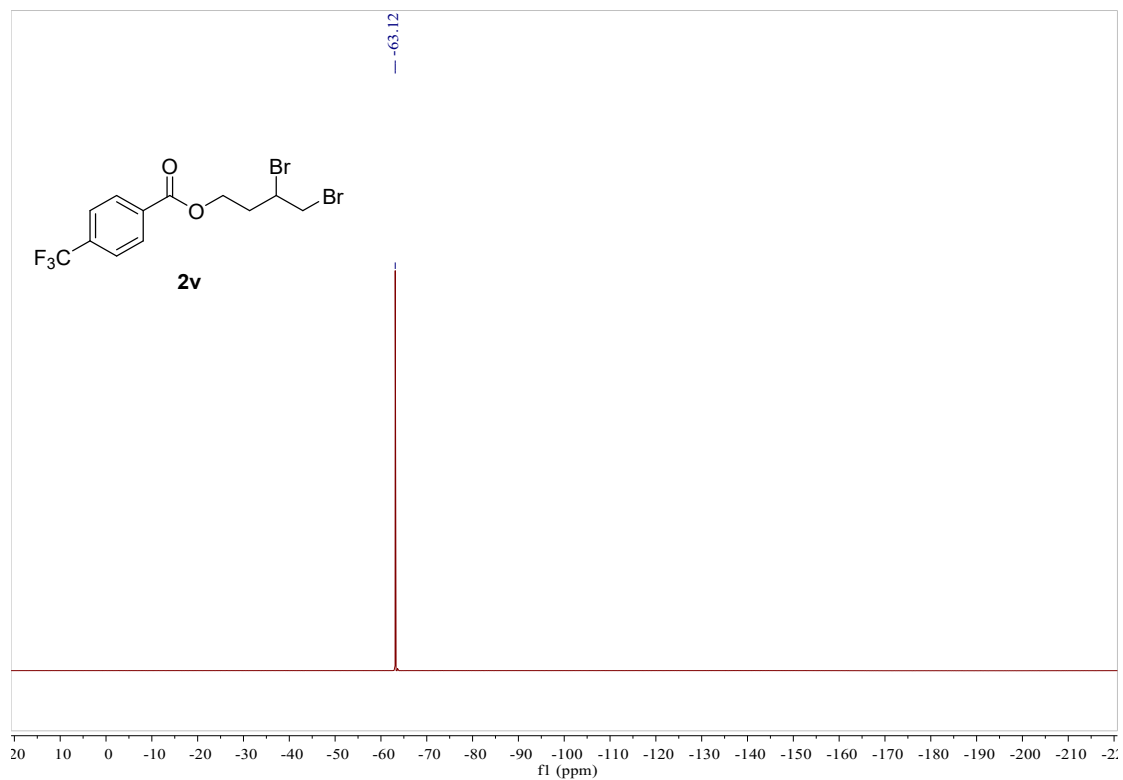

### <sup>13</sup>C NMR spectra for compound (2v)

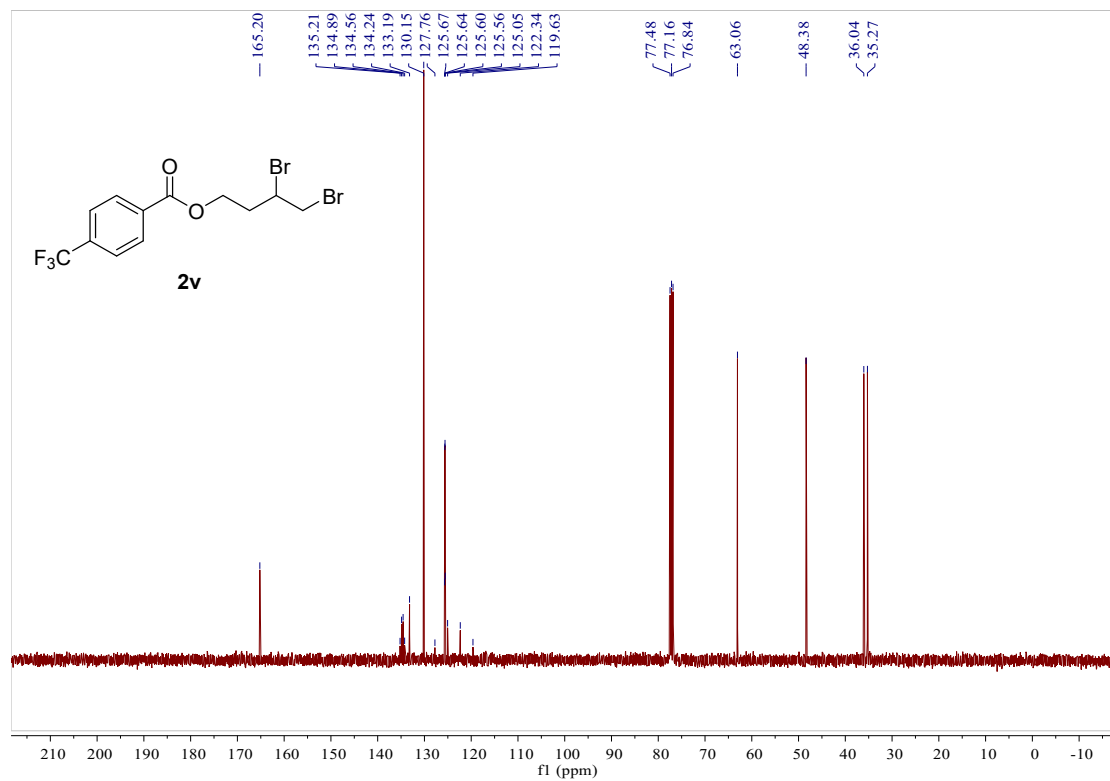

### <sup>1</sup>H NMR spectra for compound (2w)

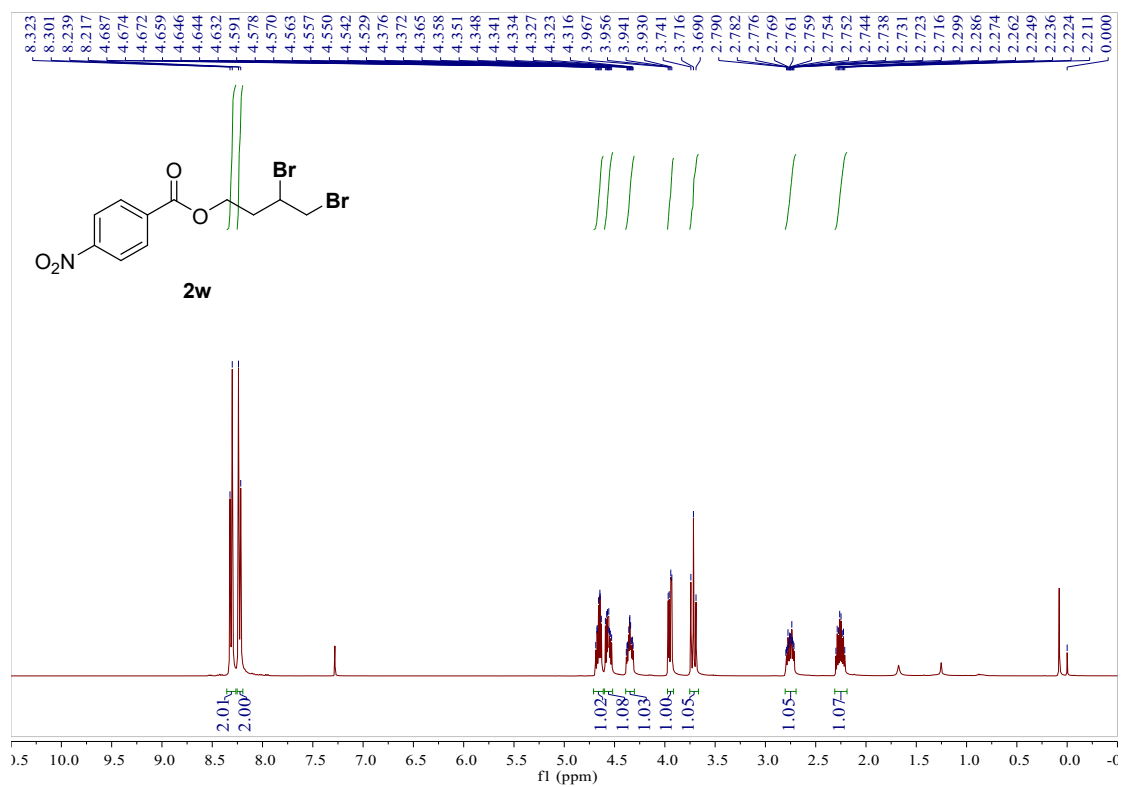

### <sup>13</sup>C NMR spectra for compound (2w)

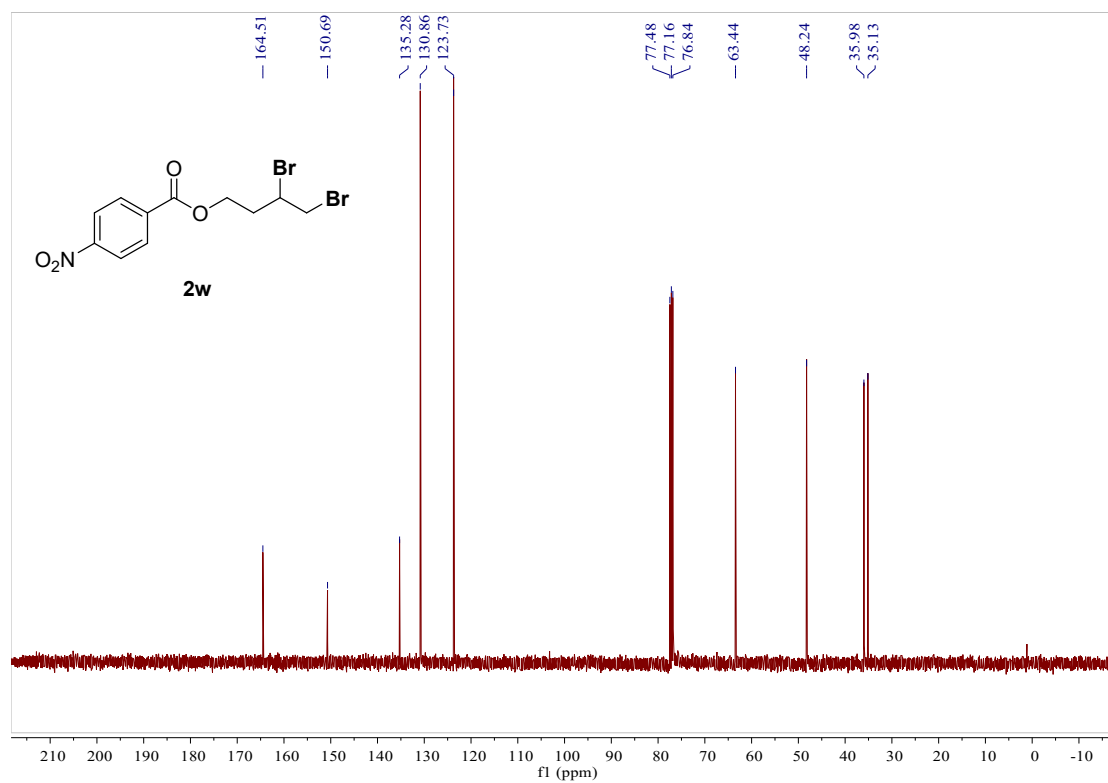

### <sup>1</sup>H NMR spectra for compound (2x)

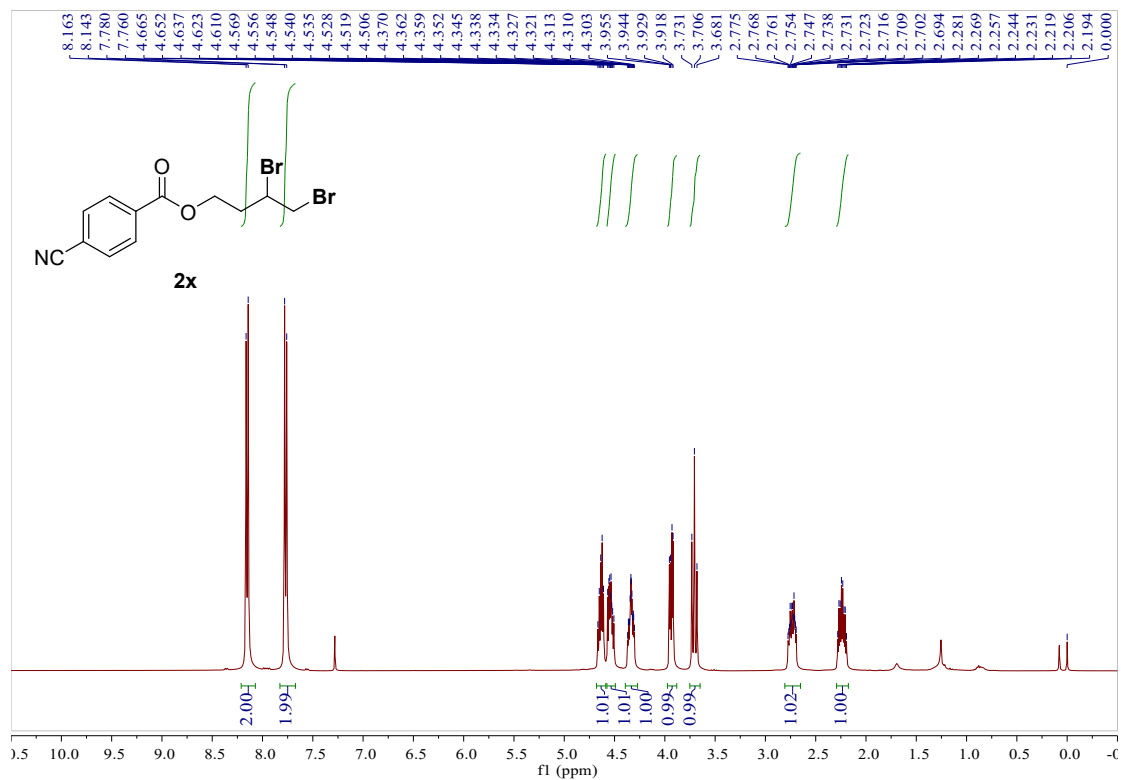

### <sup>13</sup>C NMR spectra for compound (2x)

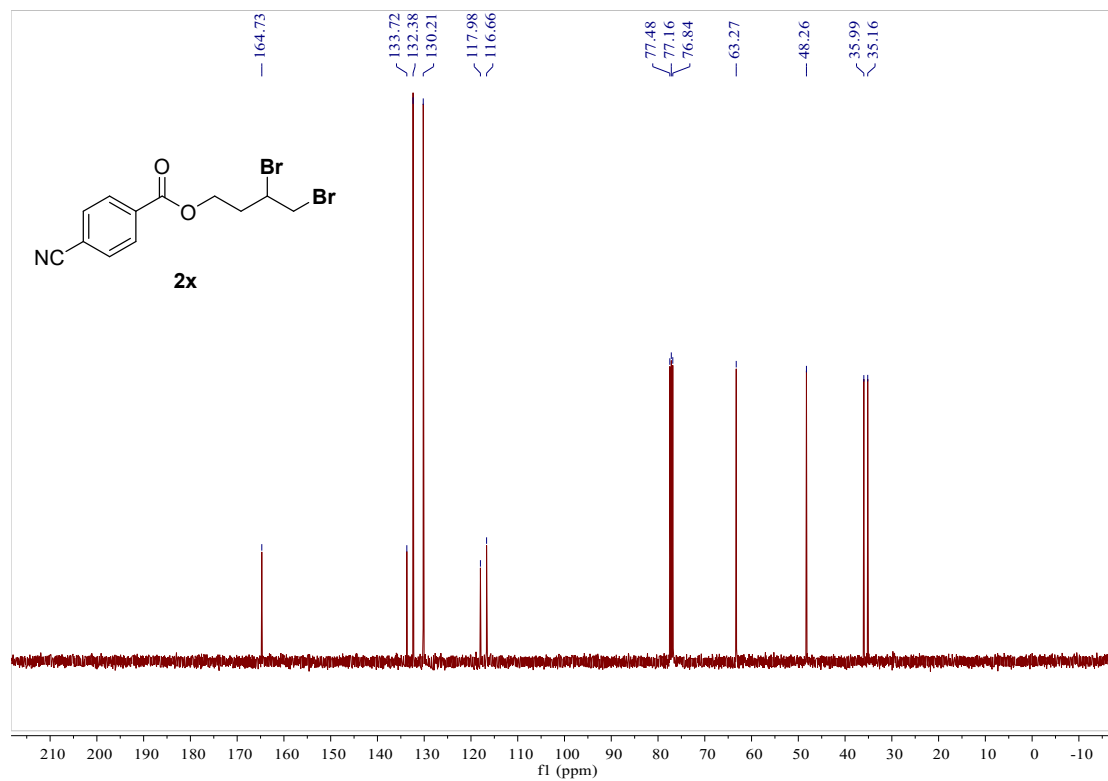

### <sup>1</sup>H NMR spectra for compound (2y)

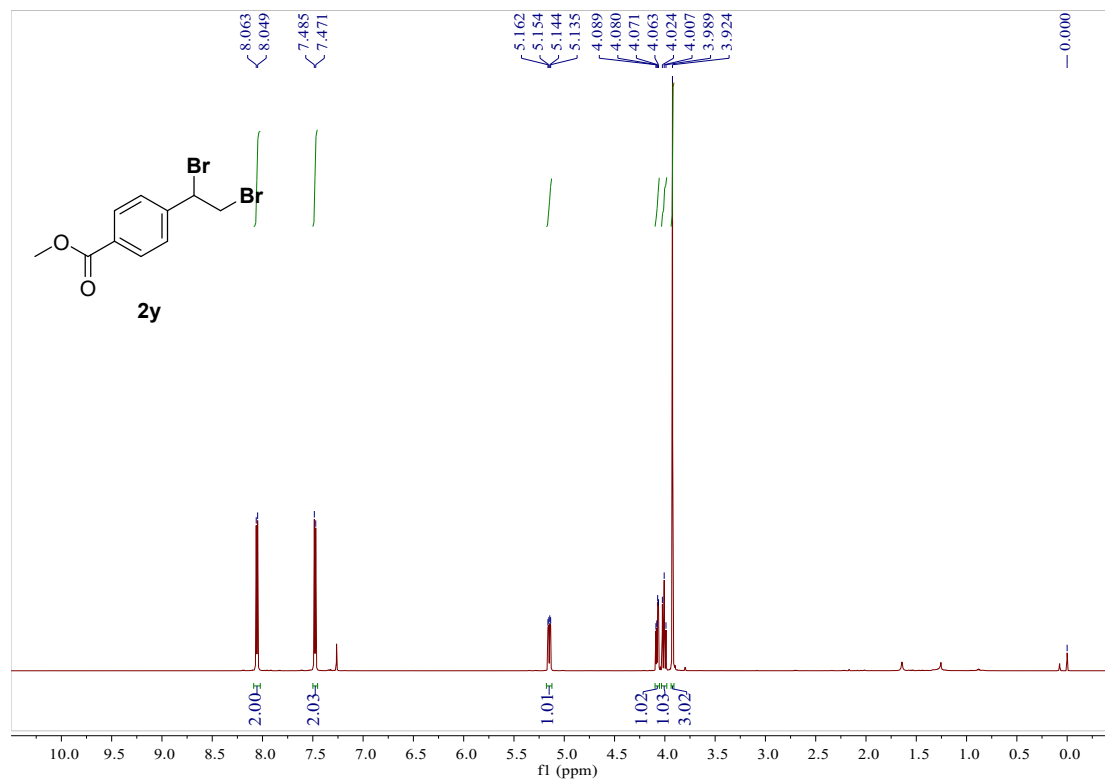

### <sup>13</sup>C NMR spectra for compound (2y)

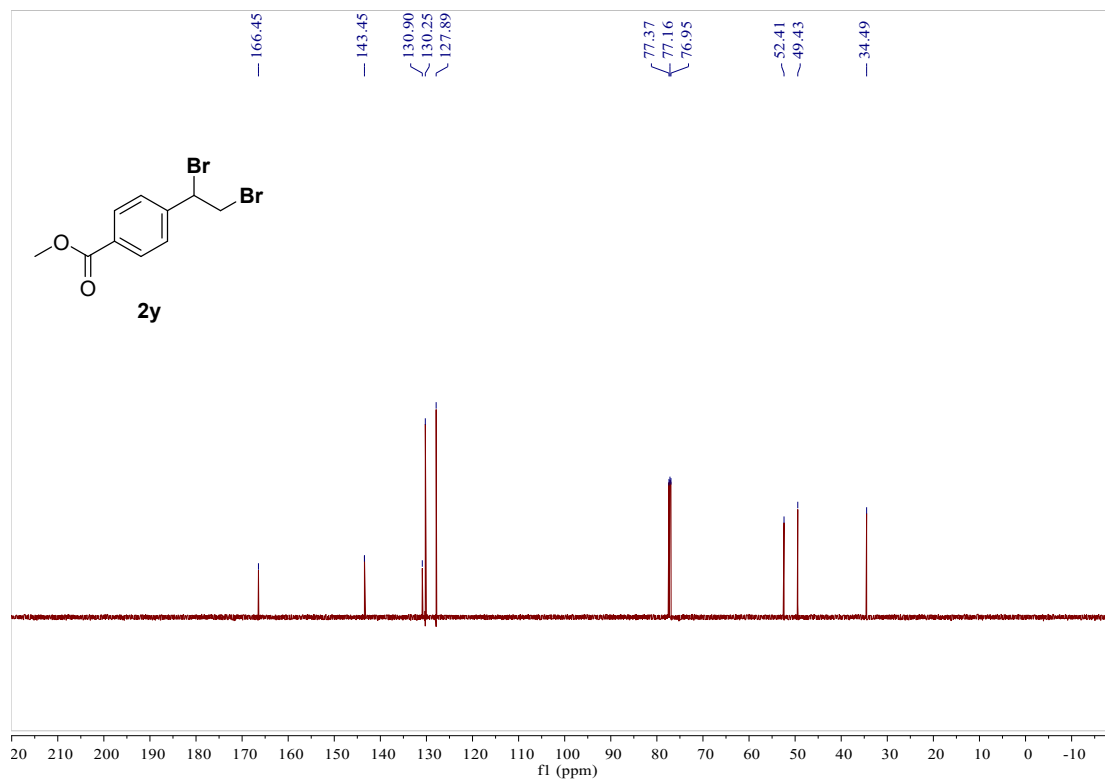



### <sup>1</sup>H NMR spectra for compound (2z)

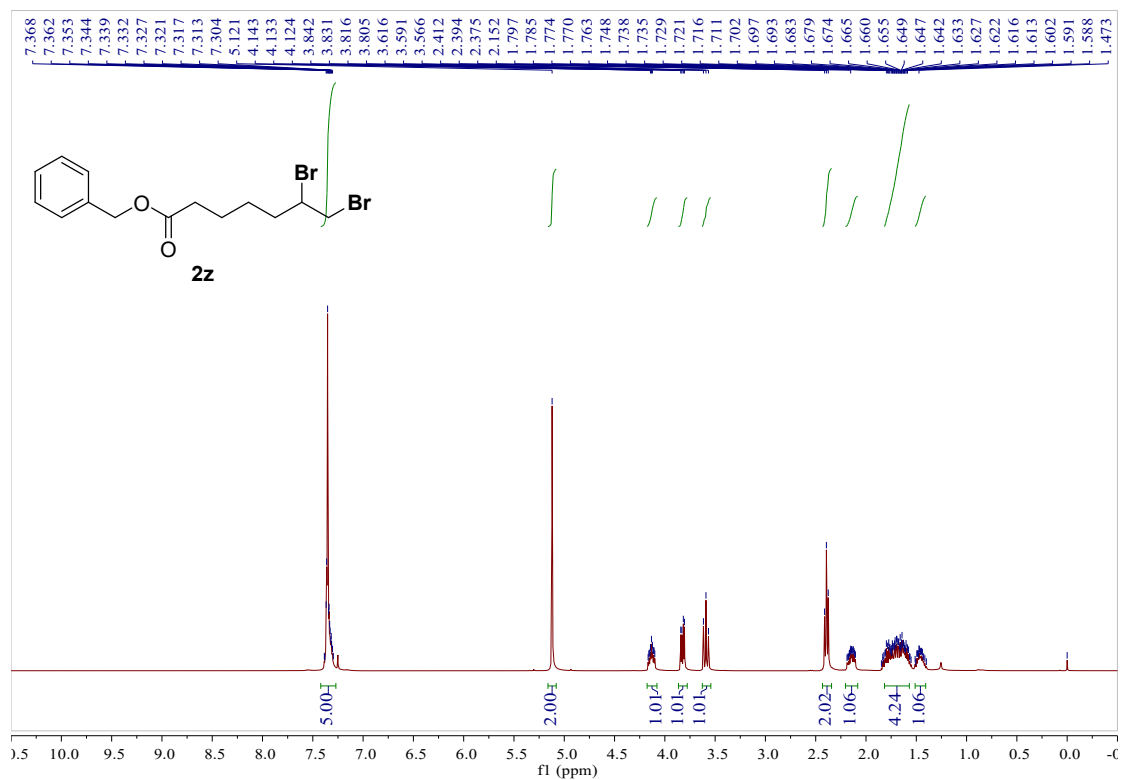

### <sup>13</sup>C NMR spectra for compound (2z)

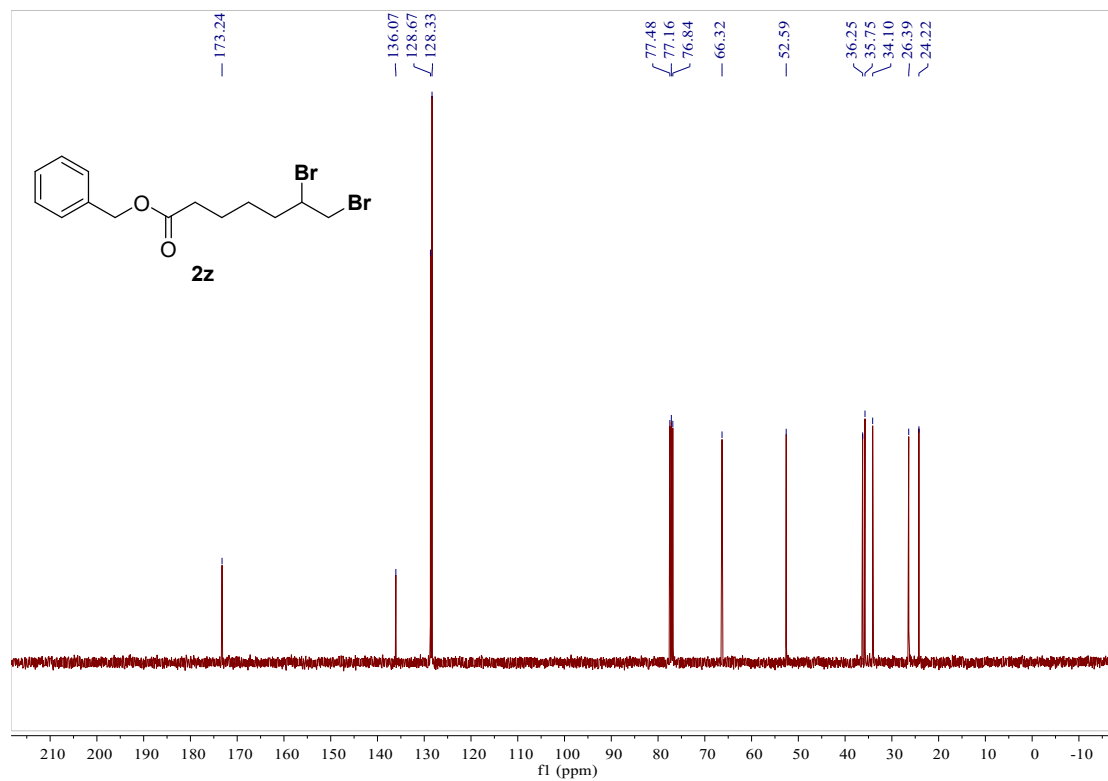

### <sup>1</sup>H NMR spectra for compound (2aa)

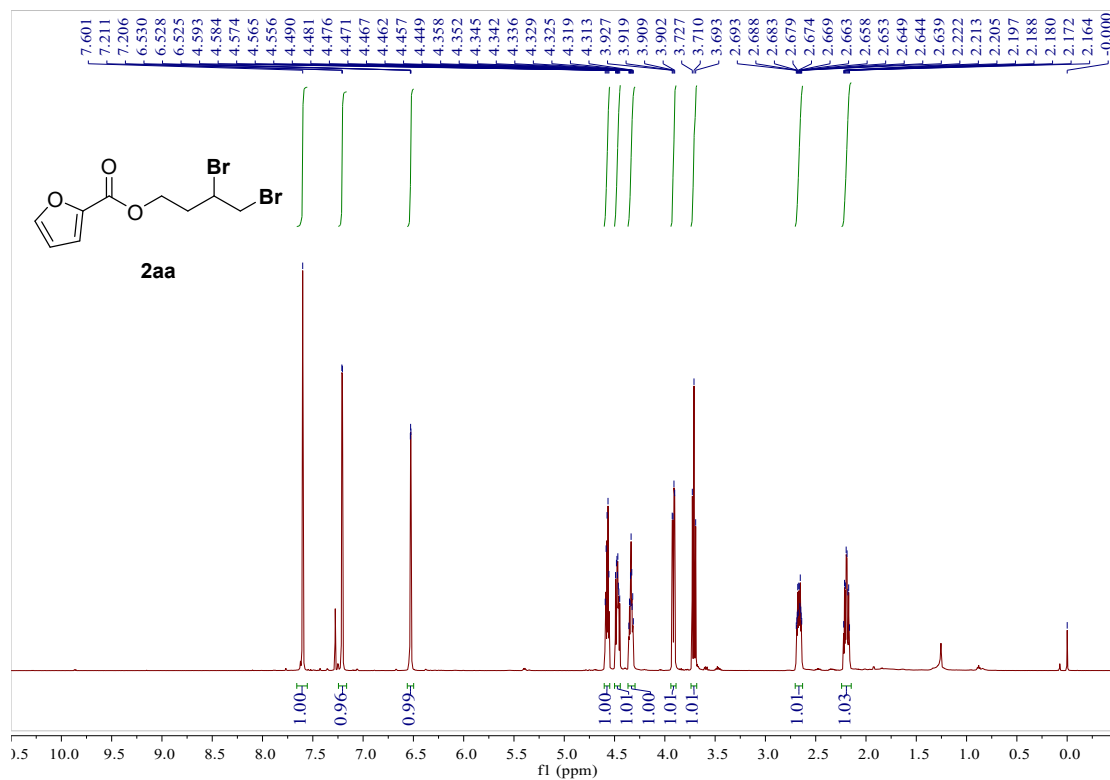

### <sup>13</sup>C NMR spectra for compound (2aa)

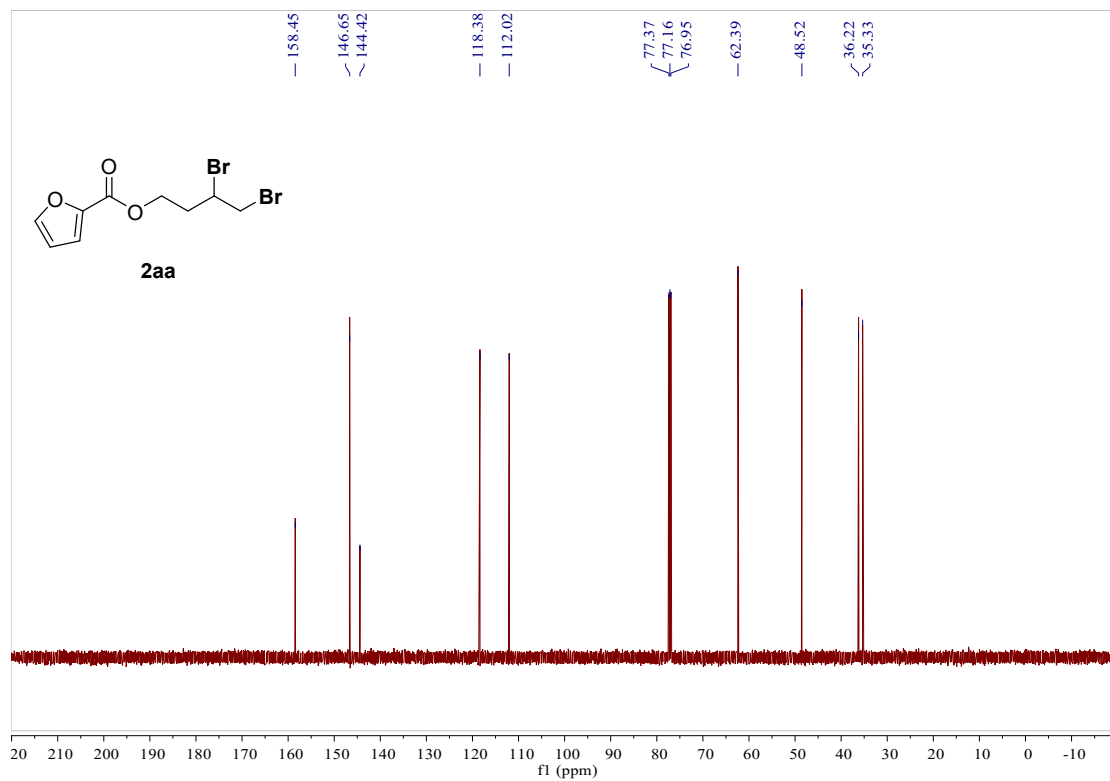

### <sup>1</sup>H NMR spectra for compound (2ab)

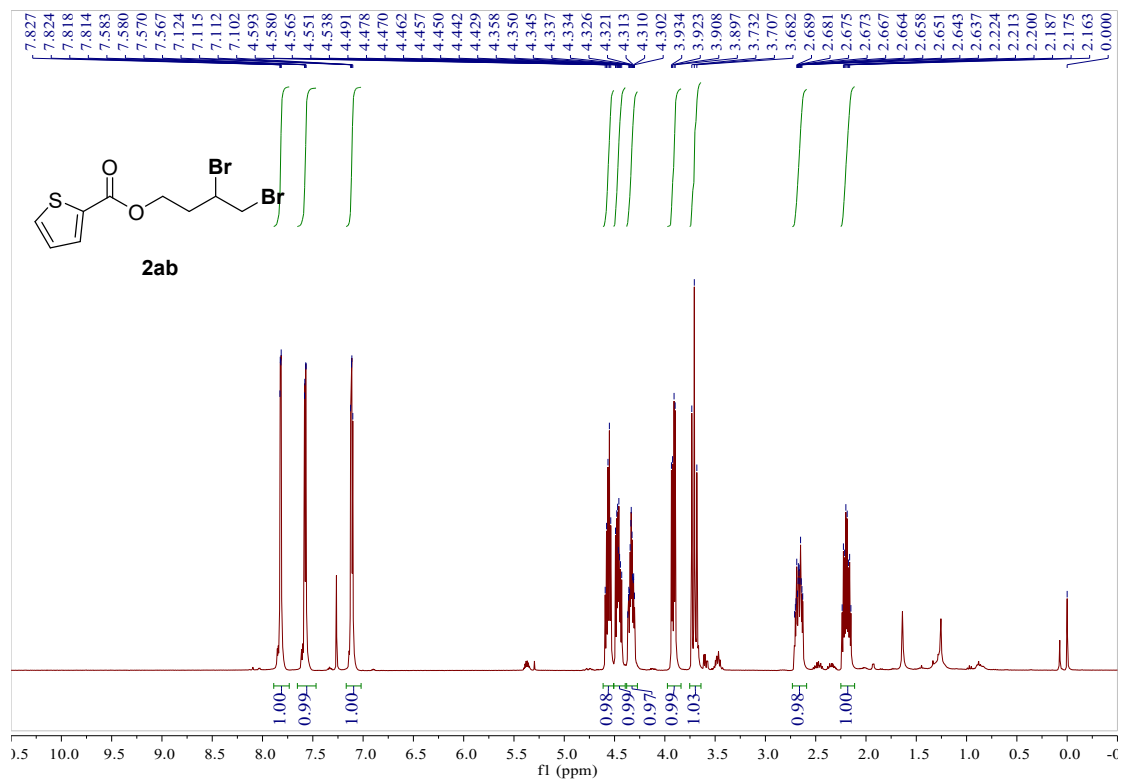

### <sup>13</sup>C NMR spectra for compound (2ab)

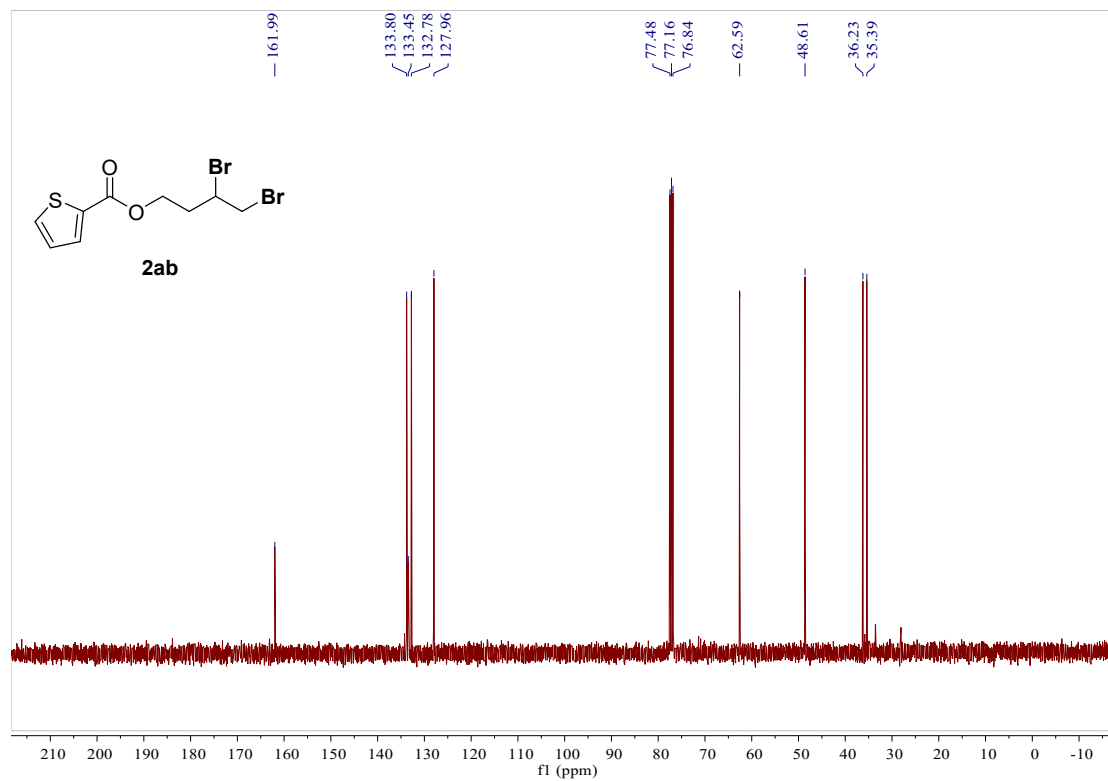

### <sup>1</sup>H NMR spectra for compound (2ac)

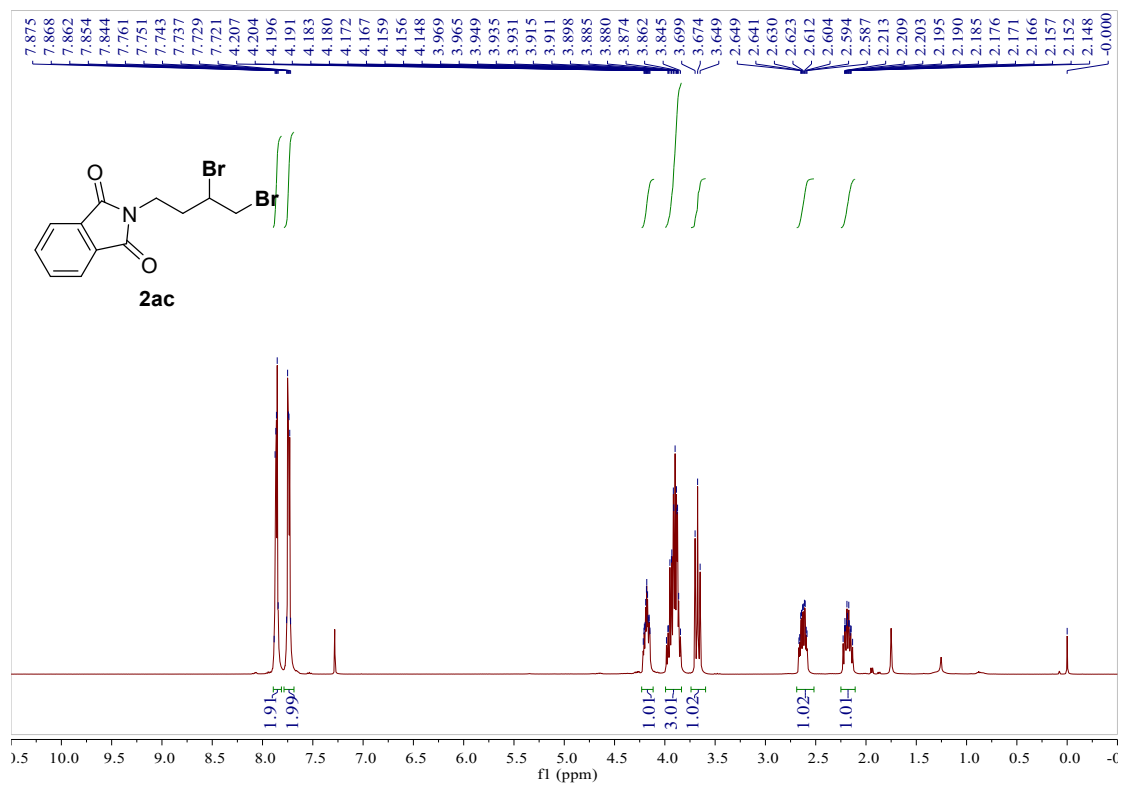

### <sup>13</sup>C NMR spectra for compound (2ac)

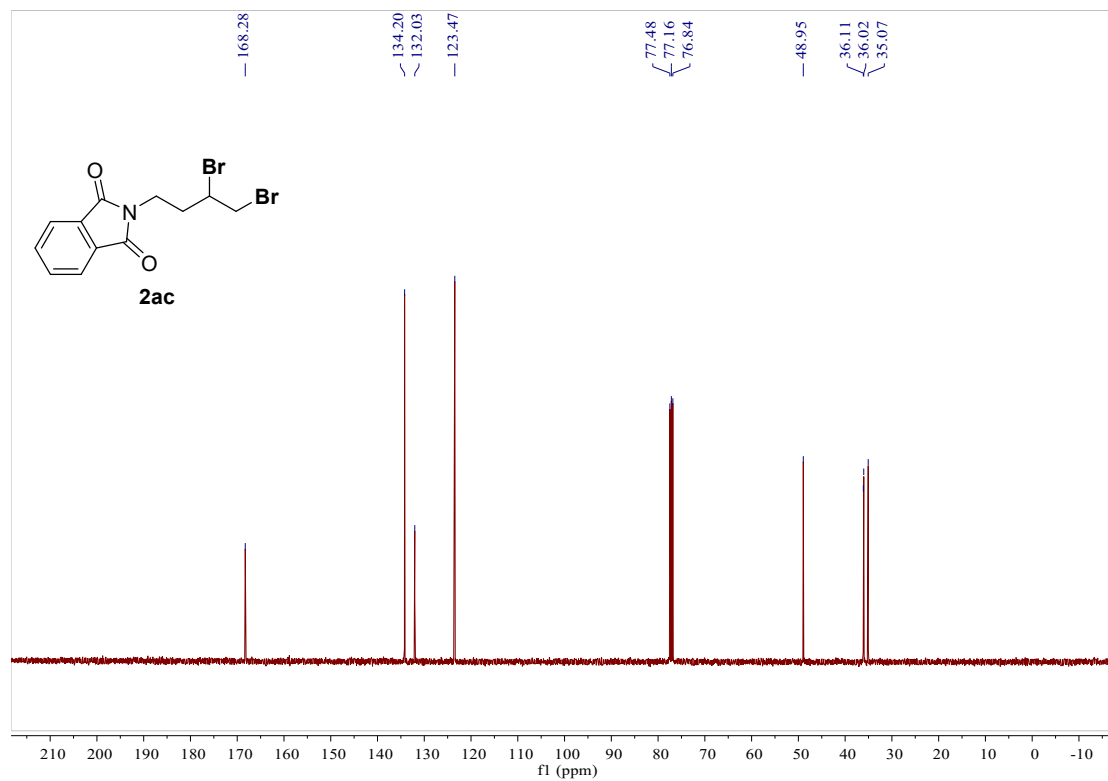

### <sup>1</sup>H NMR spectra for compound (2ad)

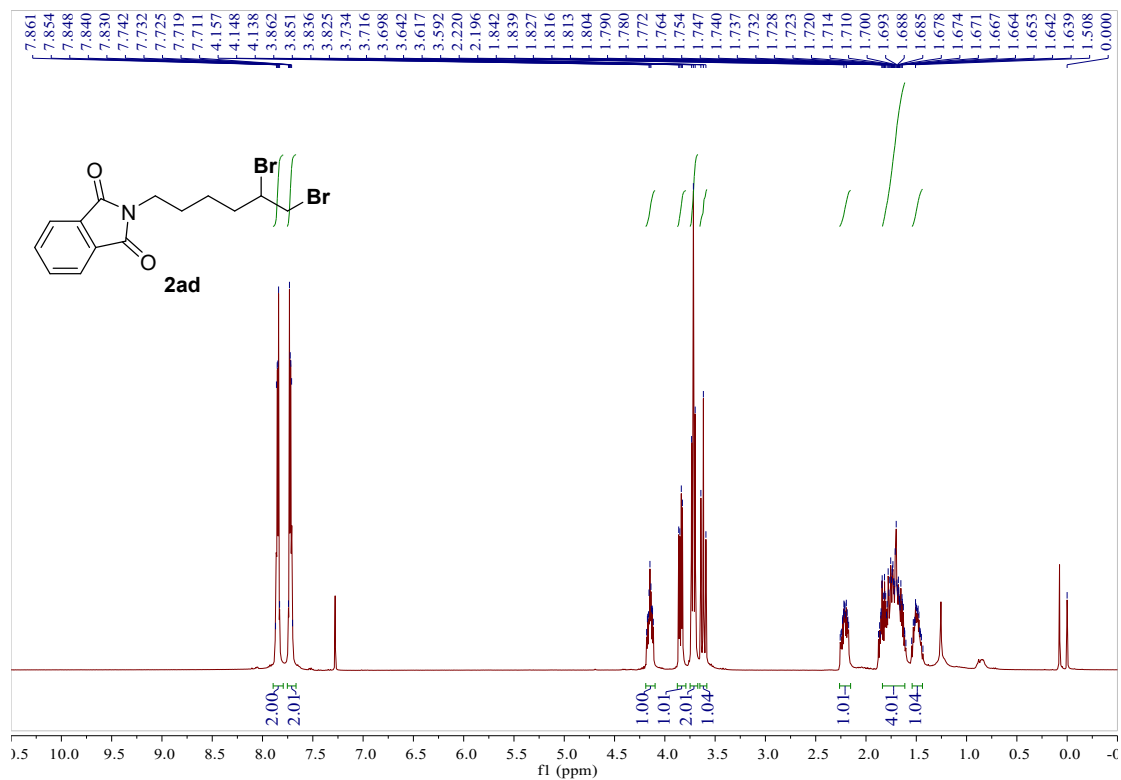

### <sup>13</sup>C NMR spectra for compound (2ad)

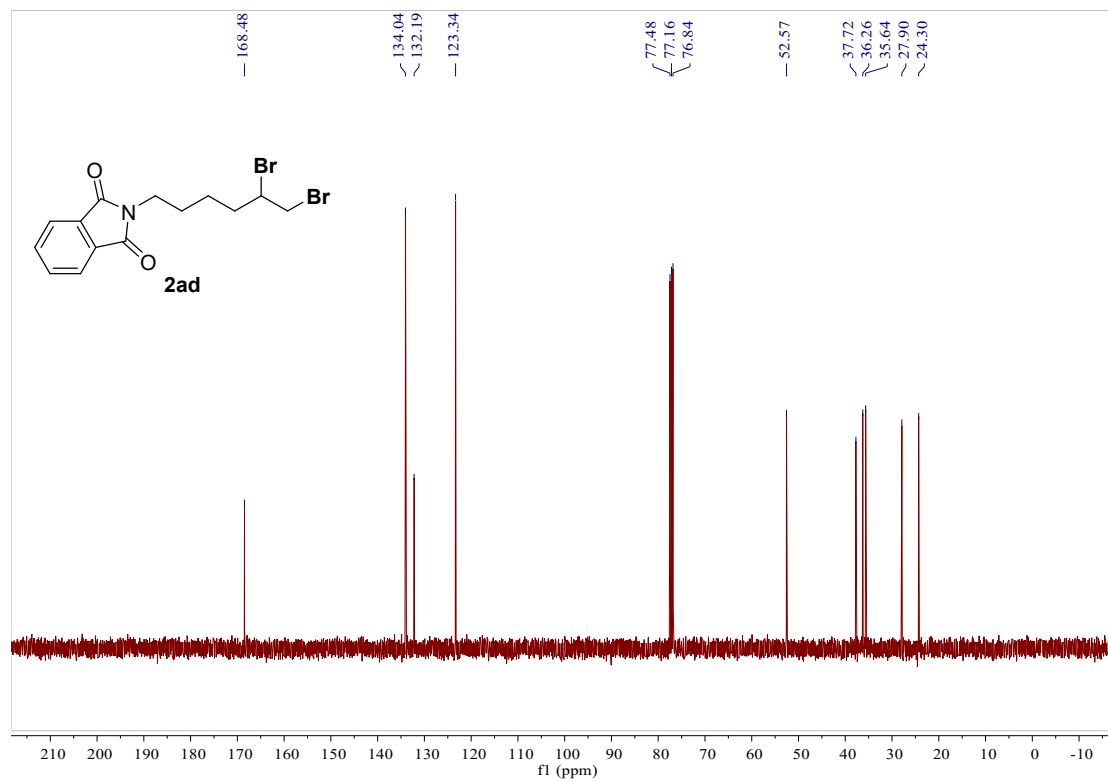

### <sup>1</sup>H NMR spectra for compound (2ae)

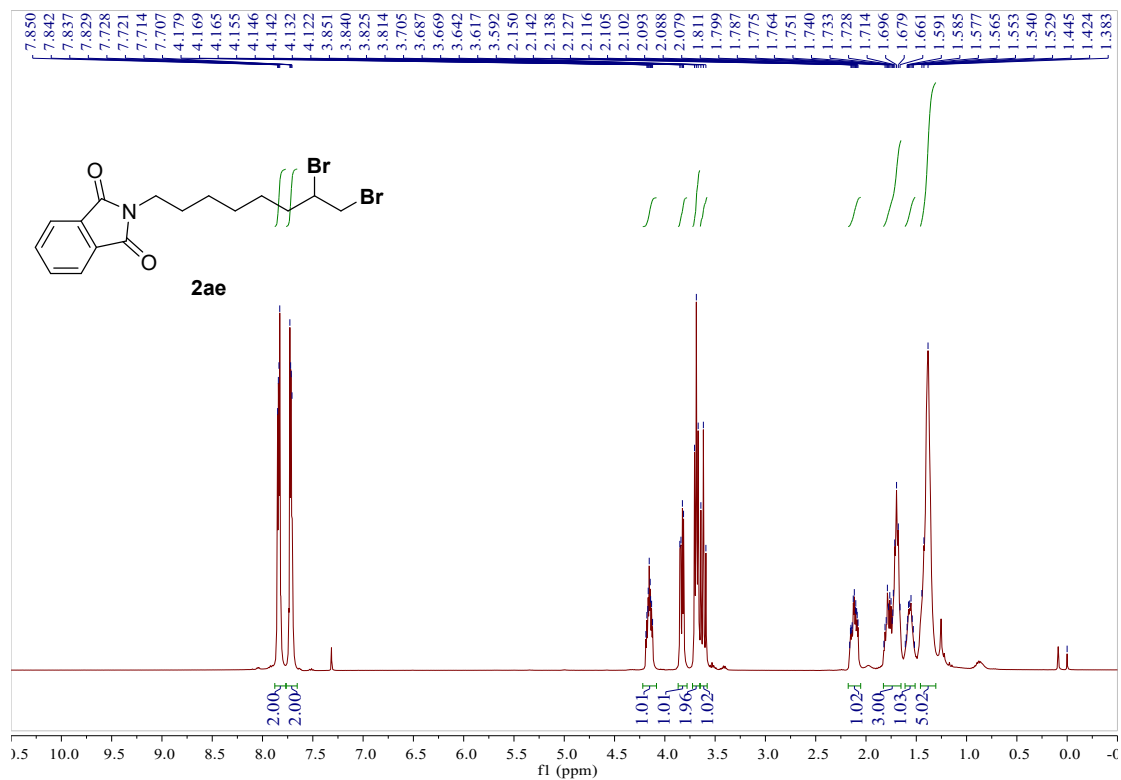

### <sup>13</sup>C NMR spectra for compound (2ae)

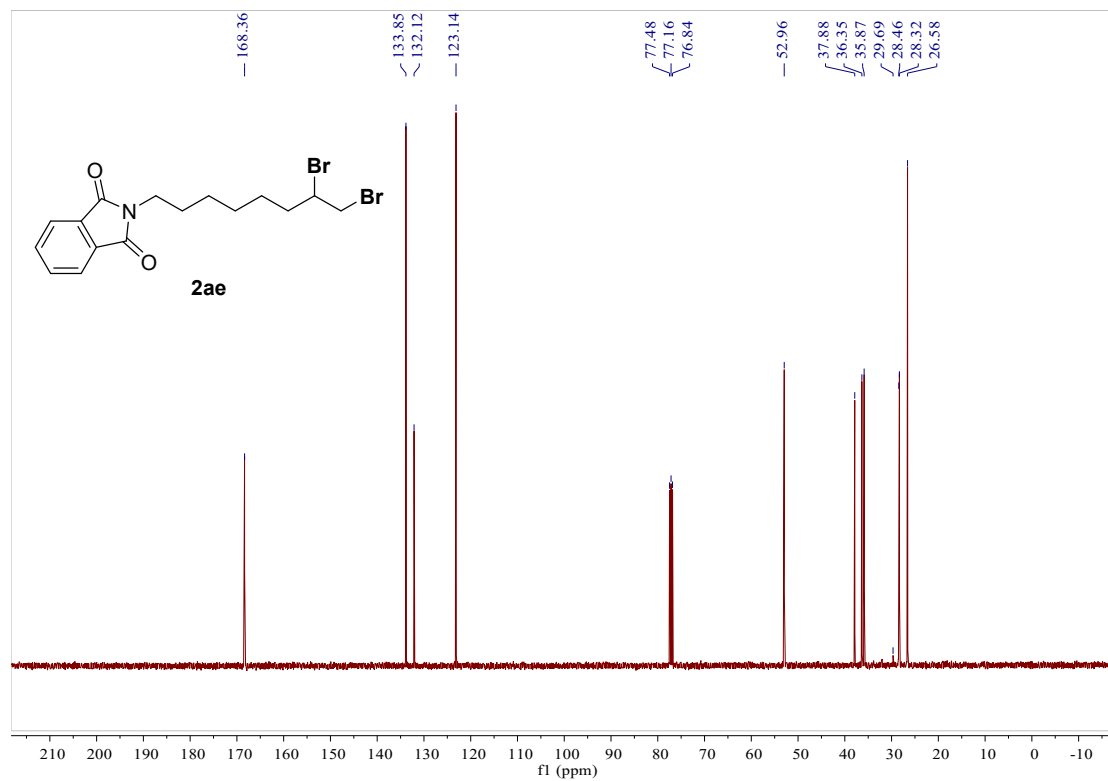

### <sup>1</sup>H NMR spectra for compound (3a)

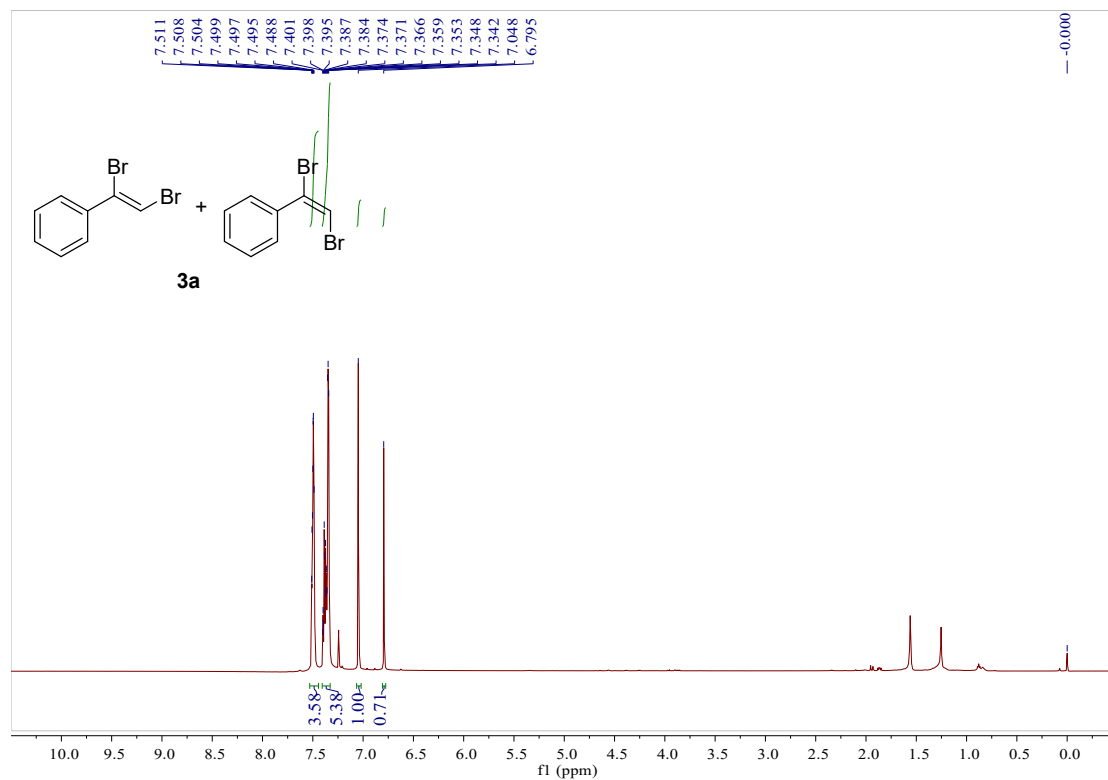

### <sup>1</sup>H NMR spectra for compound (3b)

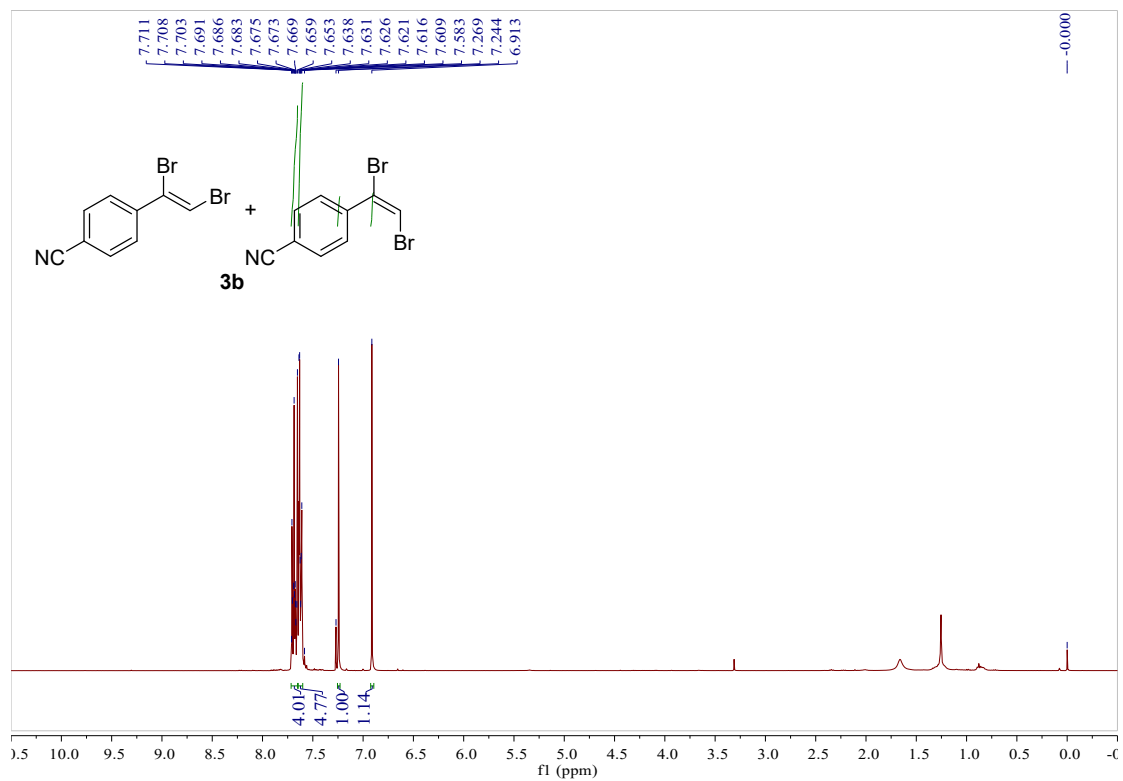

# <sup>1</sup>H NMR spectra for compound (3c)

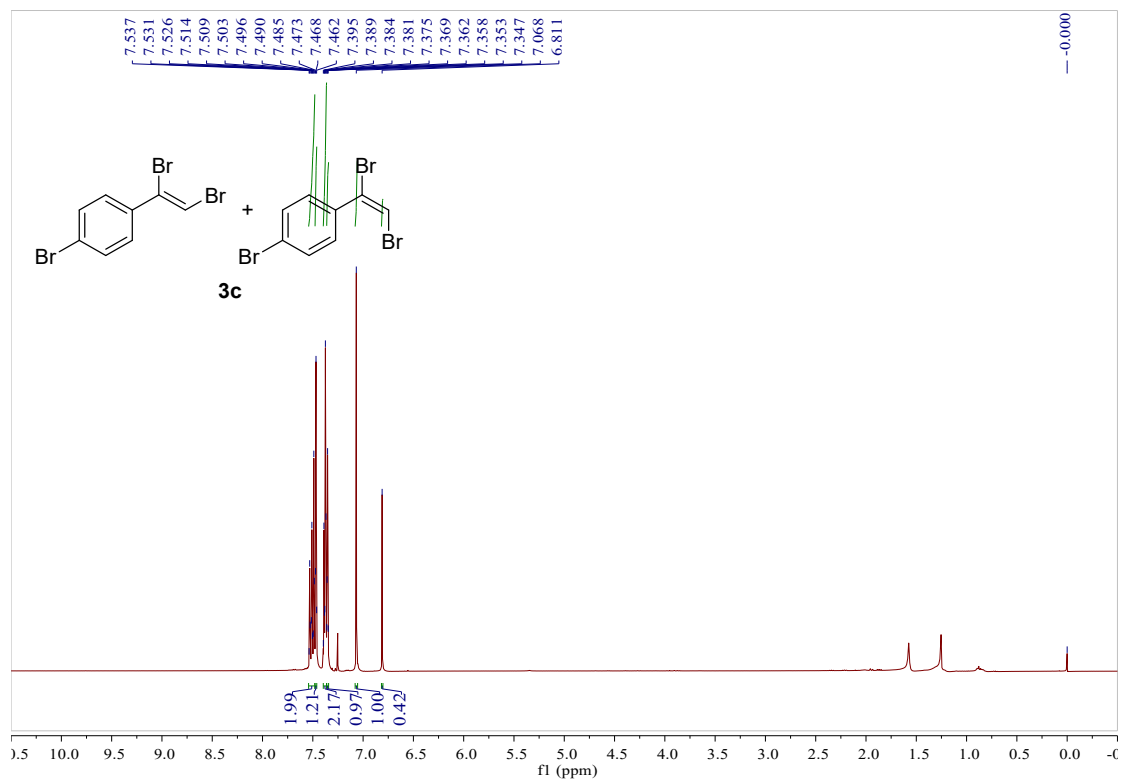



### <sup>1</sup>H NMR spectra for compound (4a)

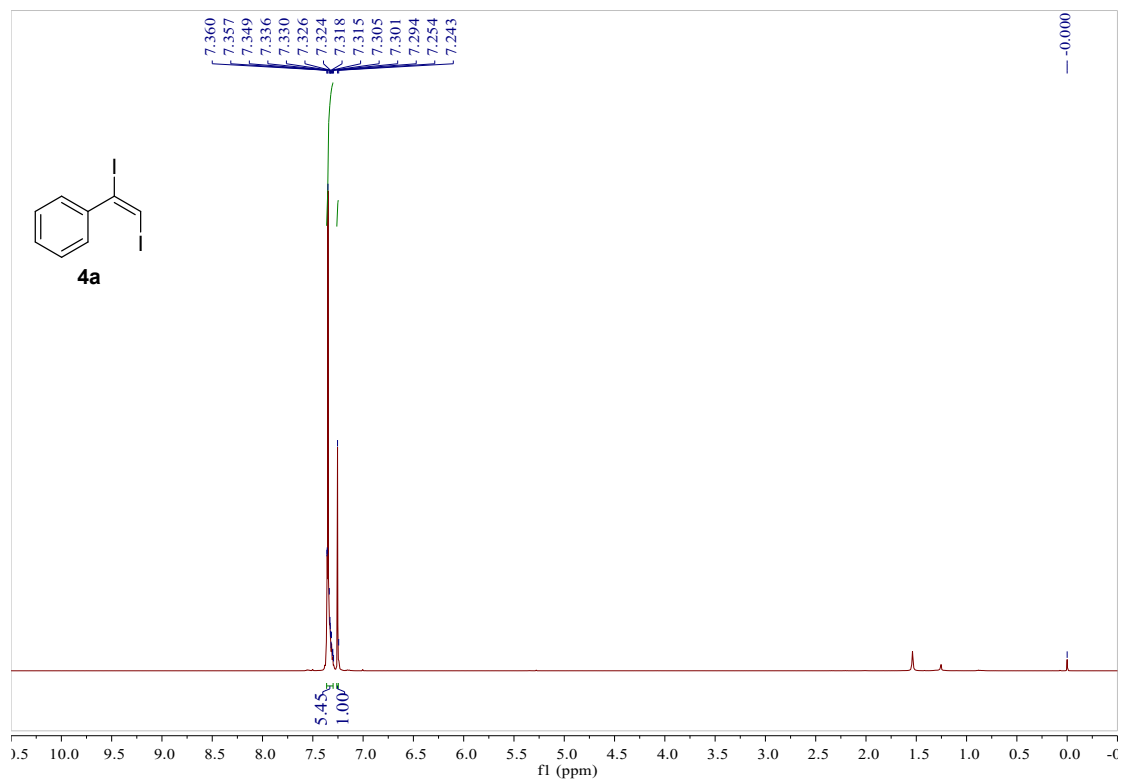

### <sup>13</sup>C NMR spectra for compound (4a)

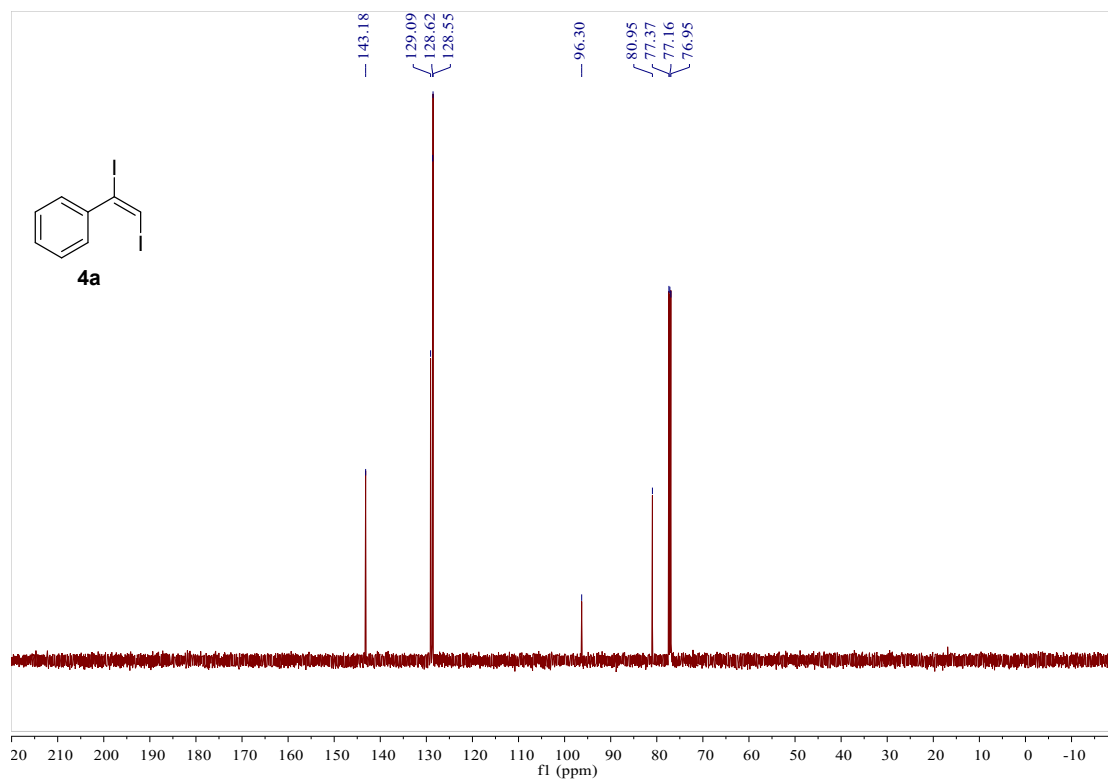

### <sup>1</sup>H NMR spectra for compound (4b)

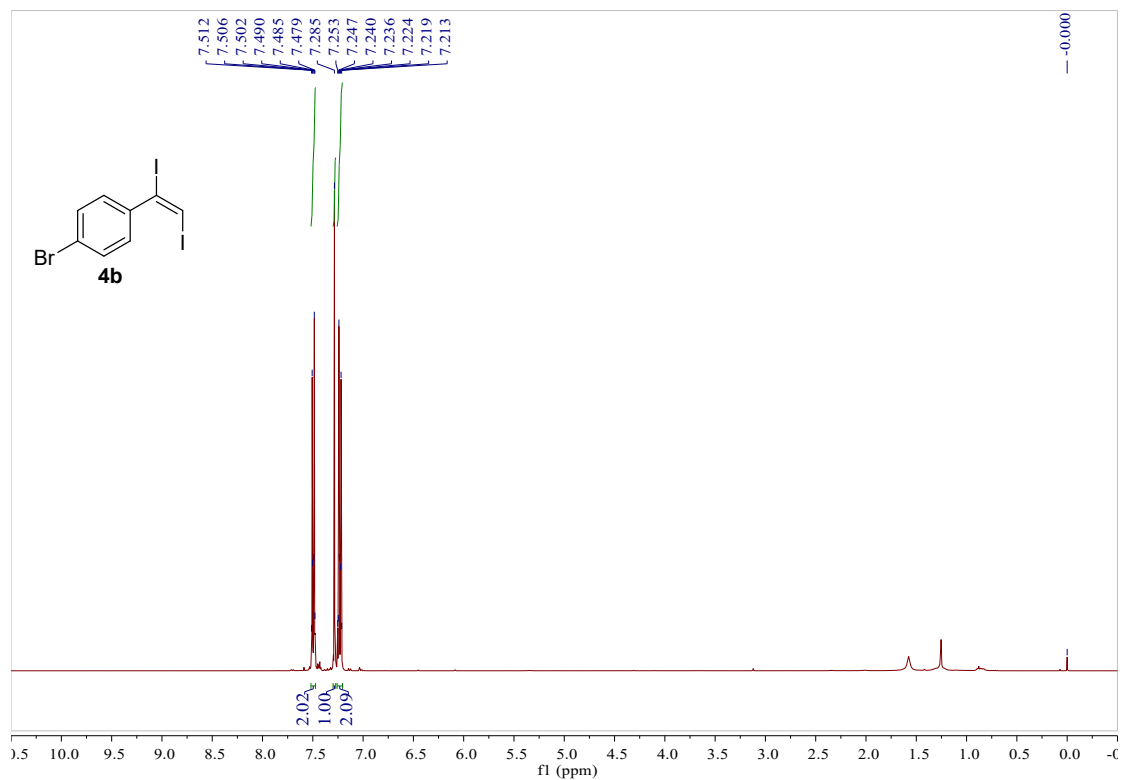

### <sup>13</sup>C NMR spectra for compound (4b)

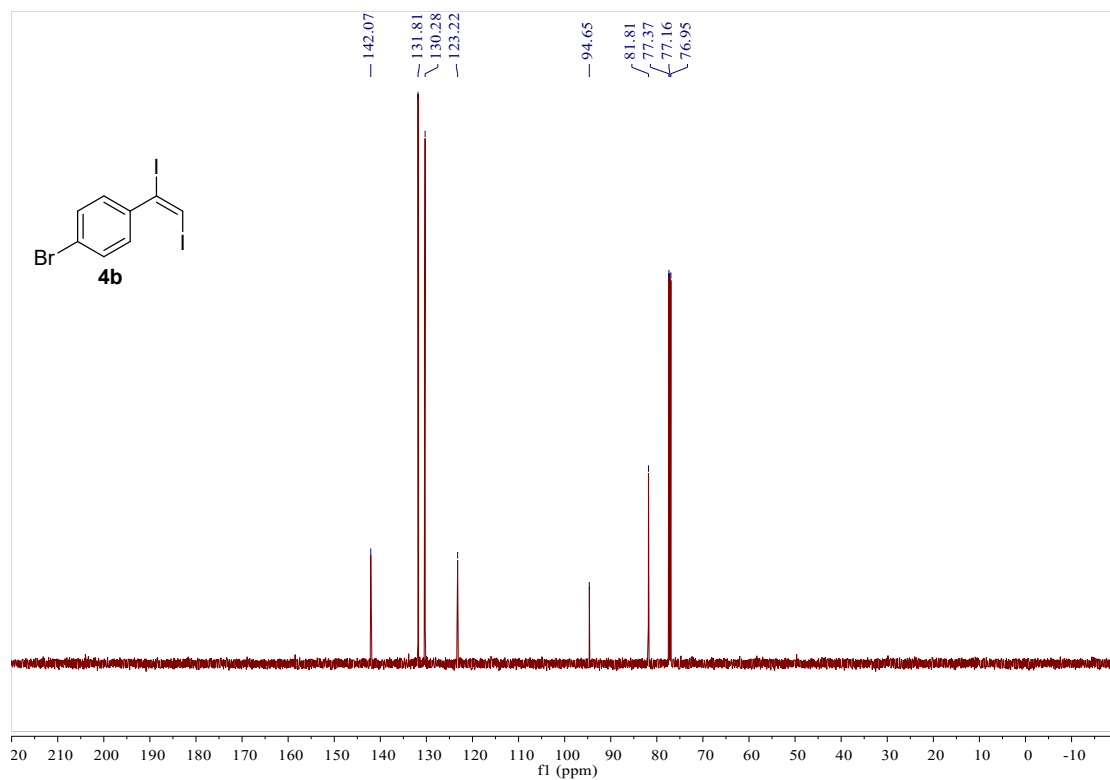

### <sup>1</sup>H NMR spectra for compound (5a)

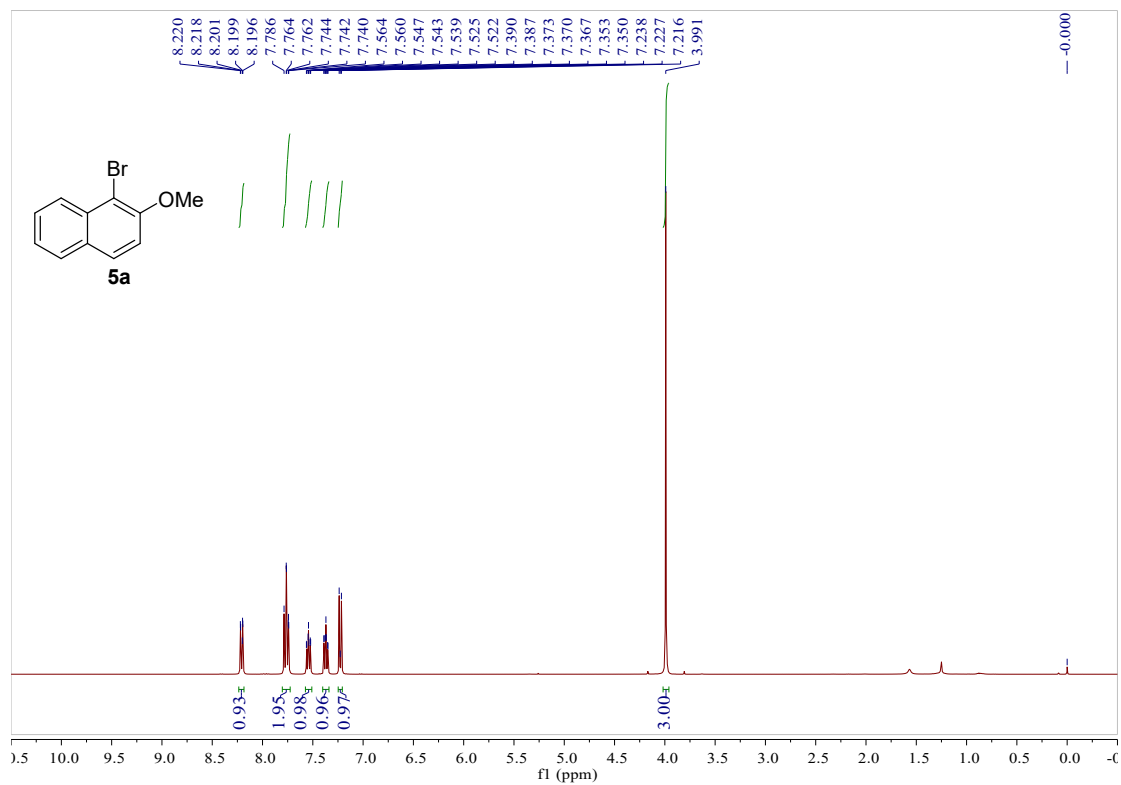

### <sup>13</sup>C NMR spectra for compound (5a)

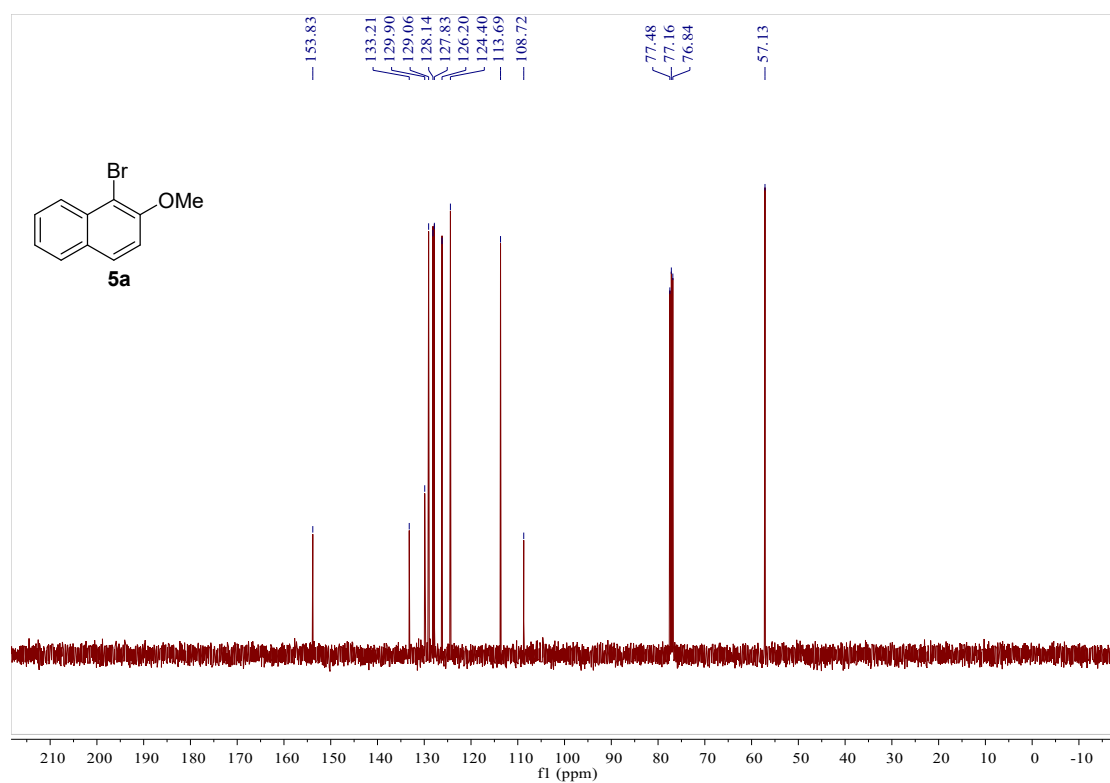

### <sup>1</sup>H NMR spectra for compound (5b)

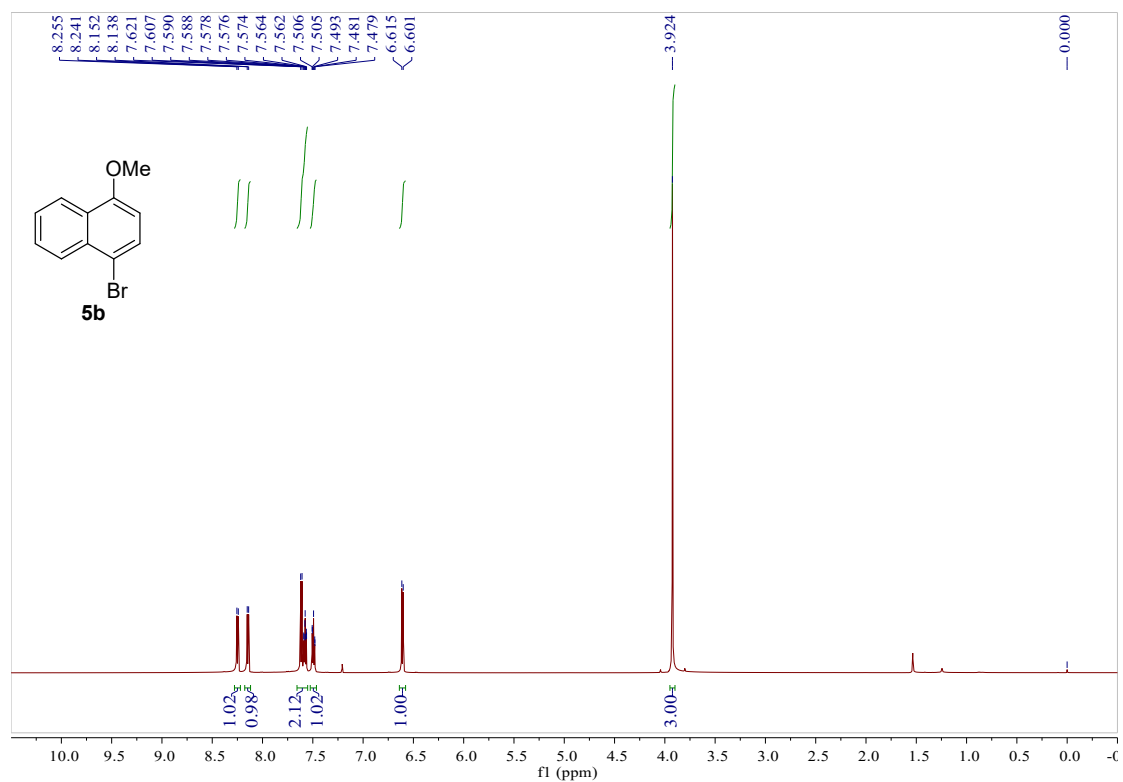

### <sup>13</sup>C NMR spectra for compound (5b)

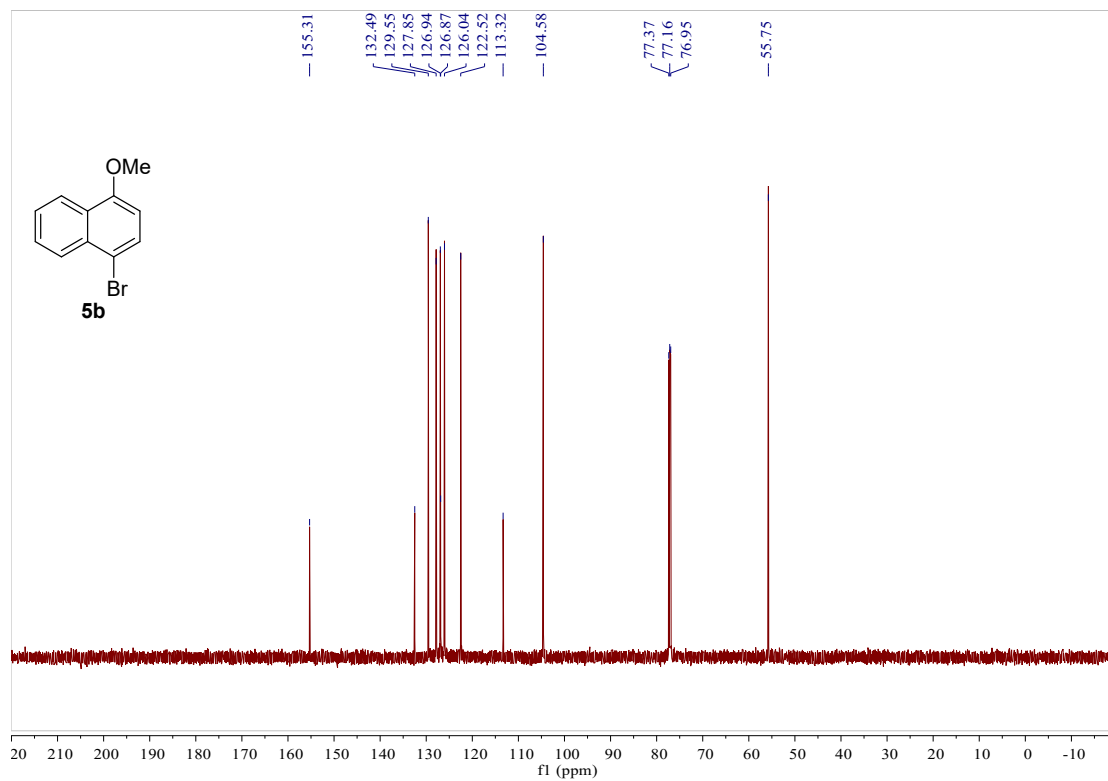

### <sup>1</sup>H NMR spectra for compound (5c)

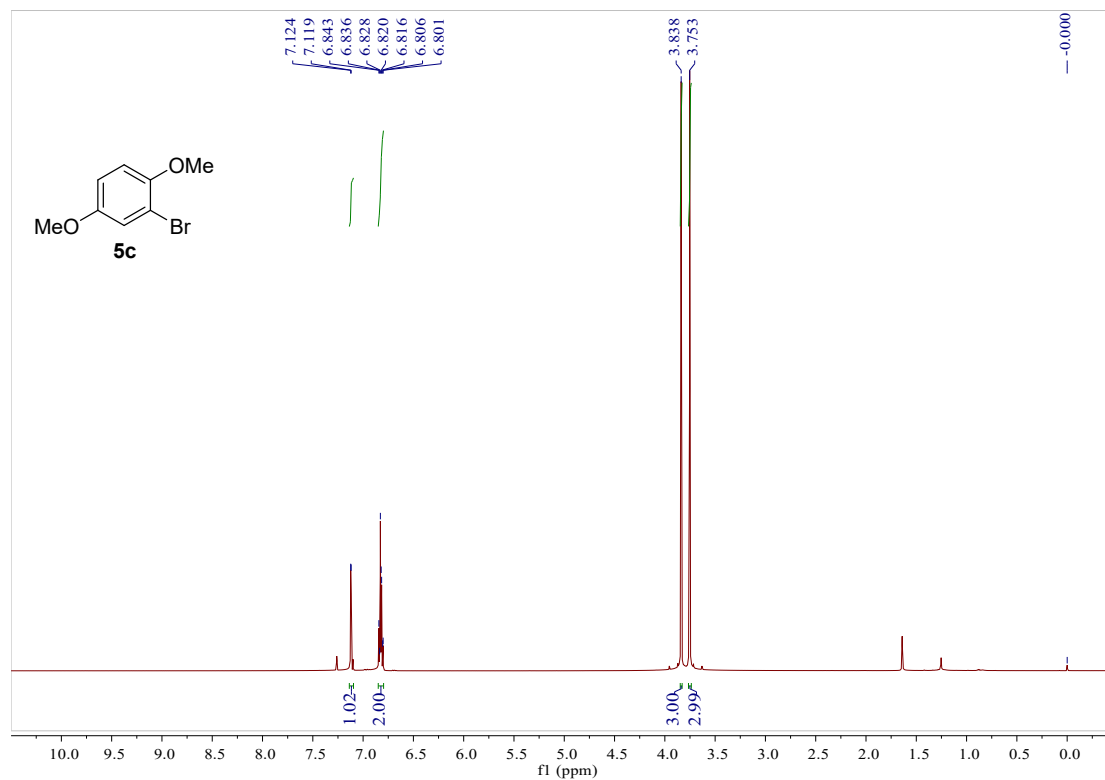

### <sup>13</sup>C NMR spectra for compound (5c)

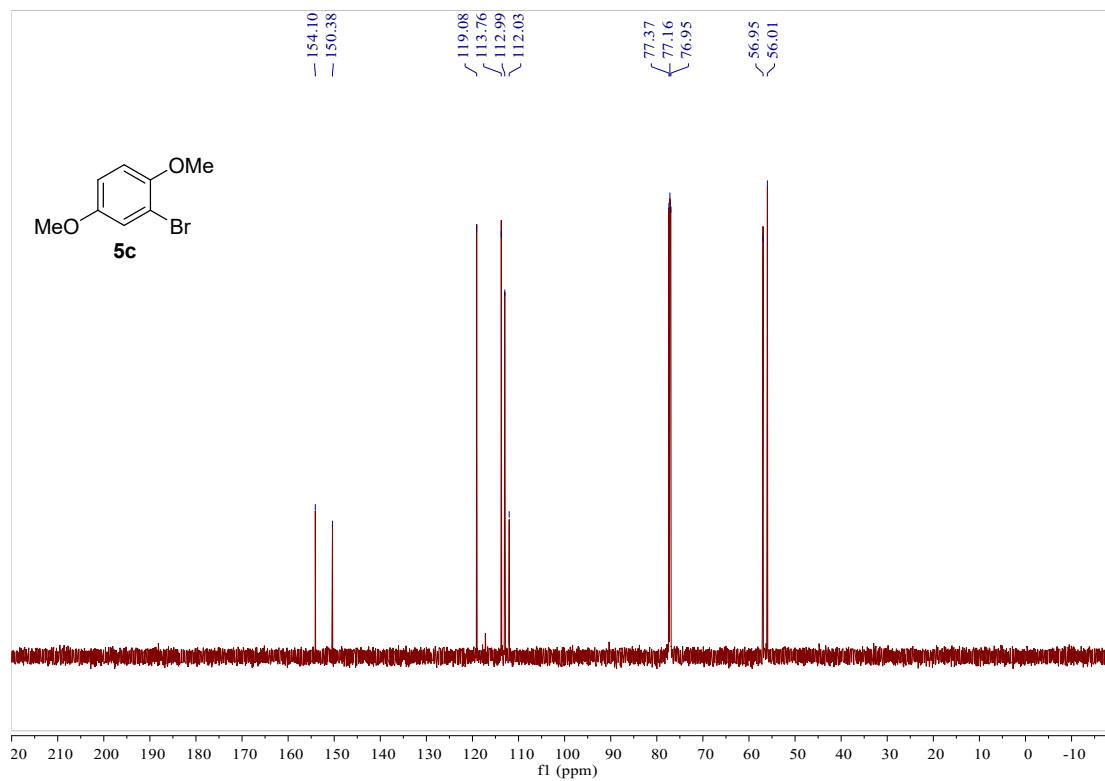

### <sup>1</sup>H NMR spectra for compound (5d)

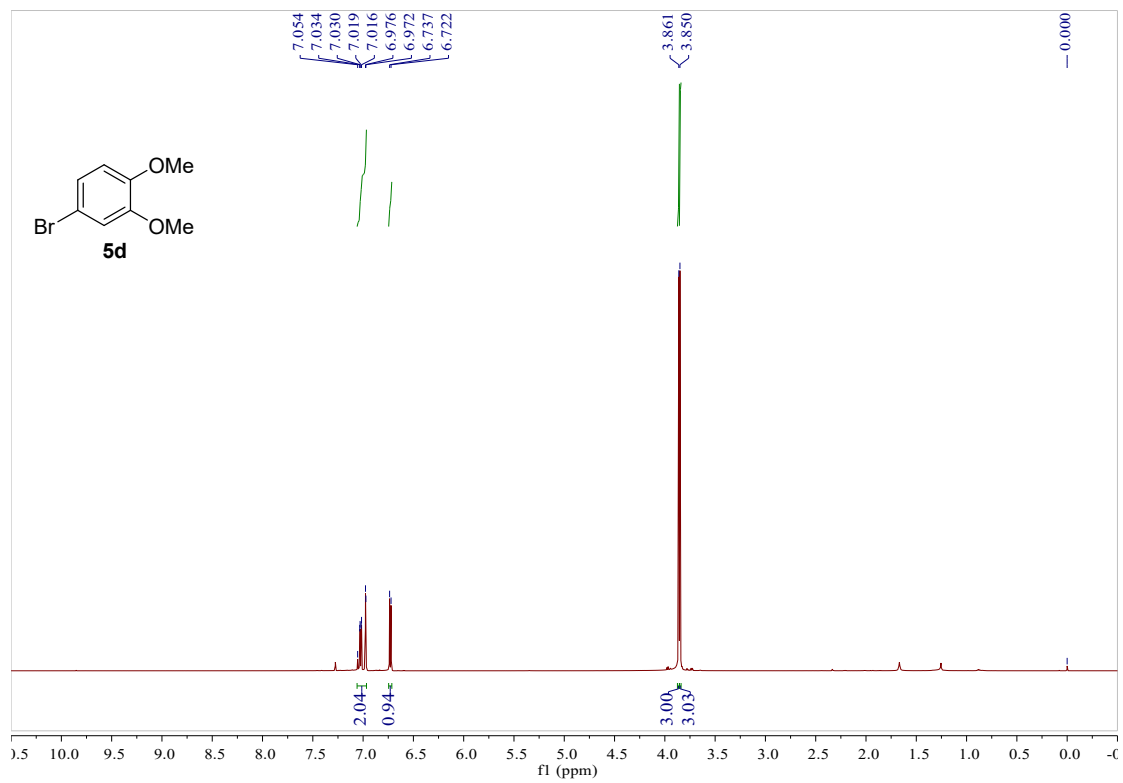

### <sup>13</sup>C NMR spectra for compound (5d)

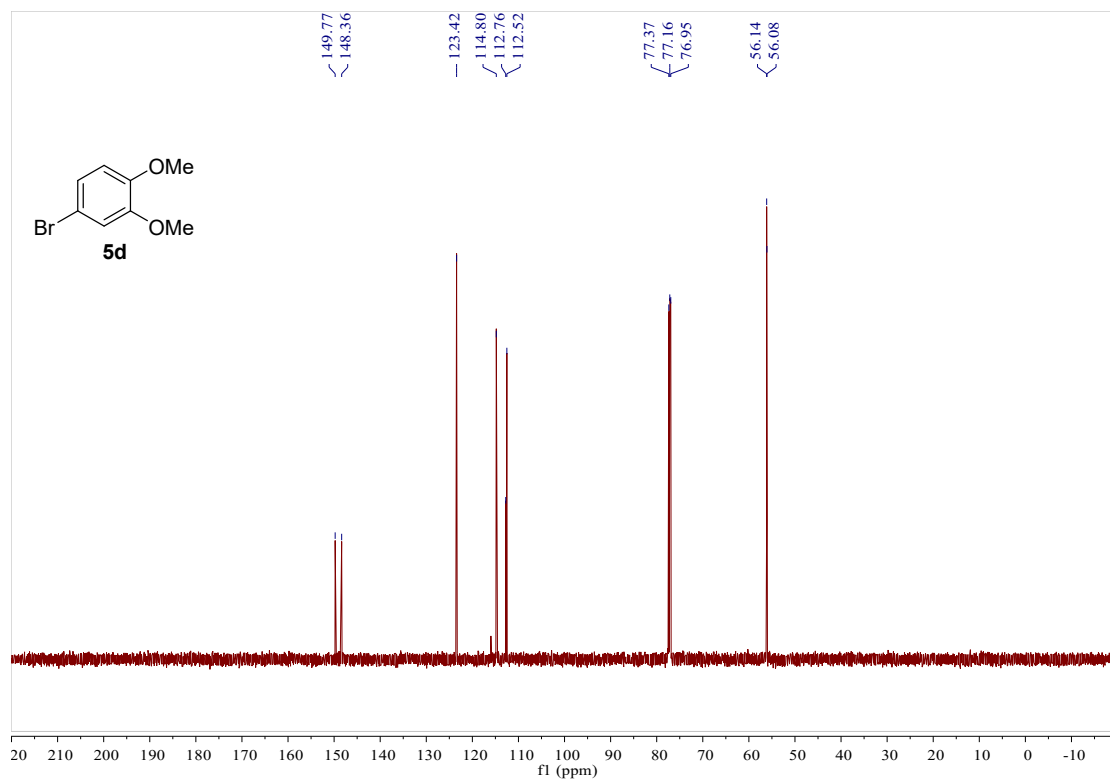

### <sup>1</sup>H NMR spectra for compound (5e)

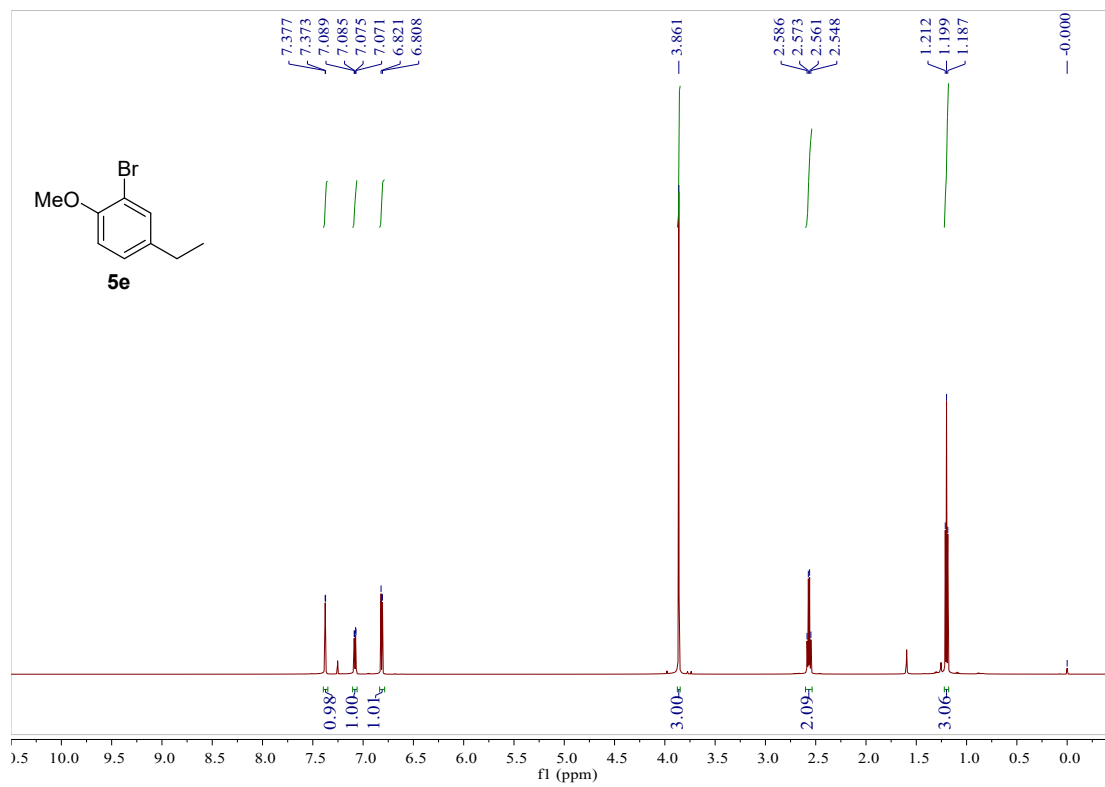

### <sup>13</sup>C NMR spectra for compound (5e)

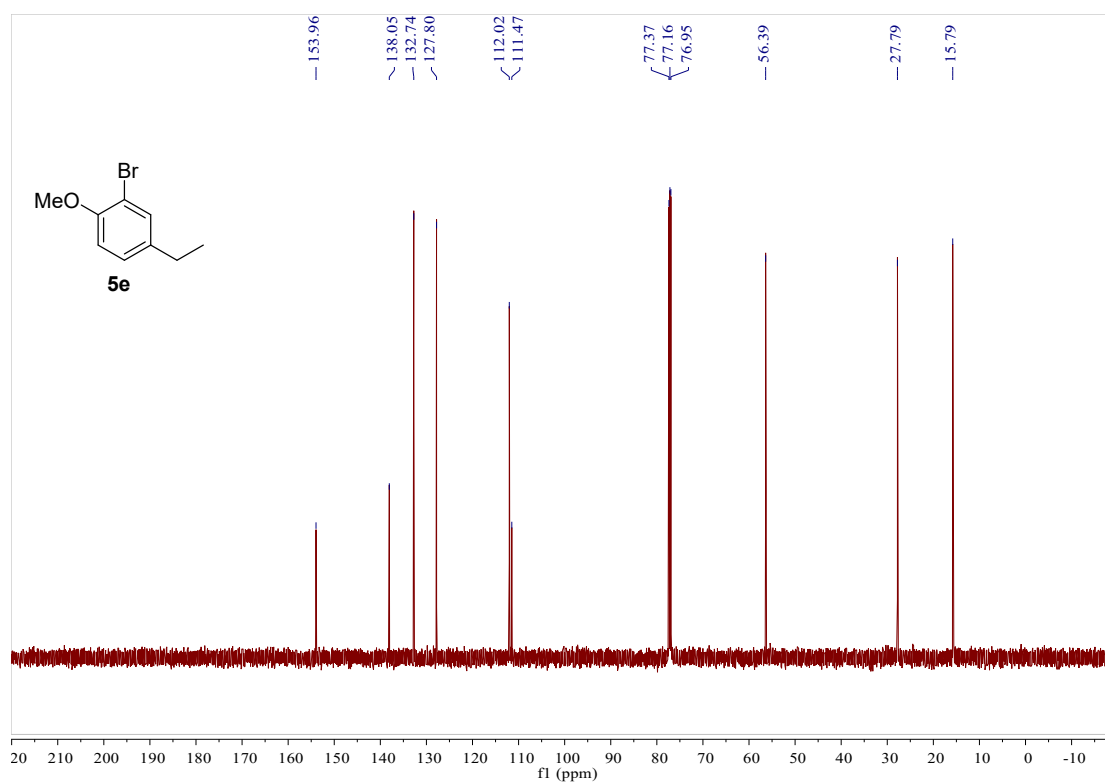

### <sup>1</sup>H NMR spectra for compound (5f)

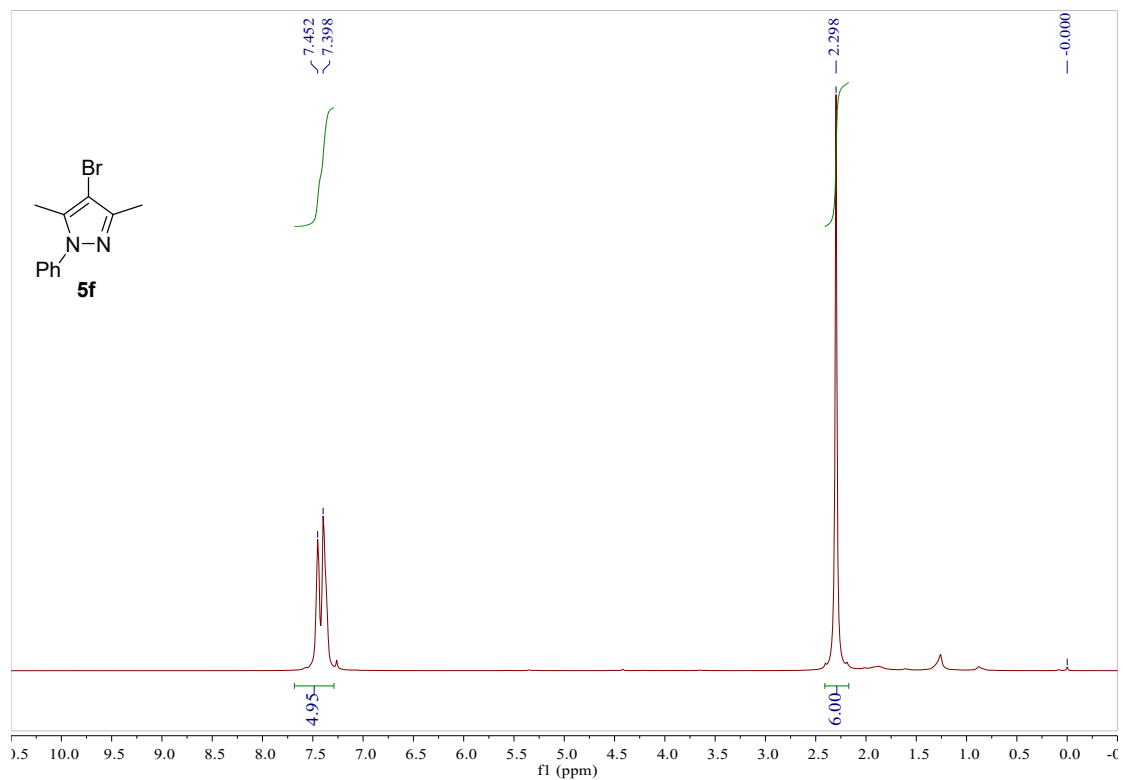

### <sup>13</sup>C NMR spectra for compound (5f)

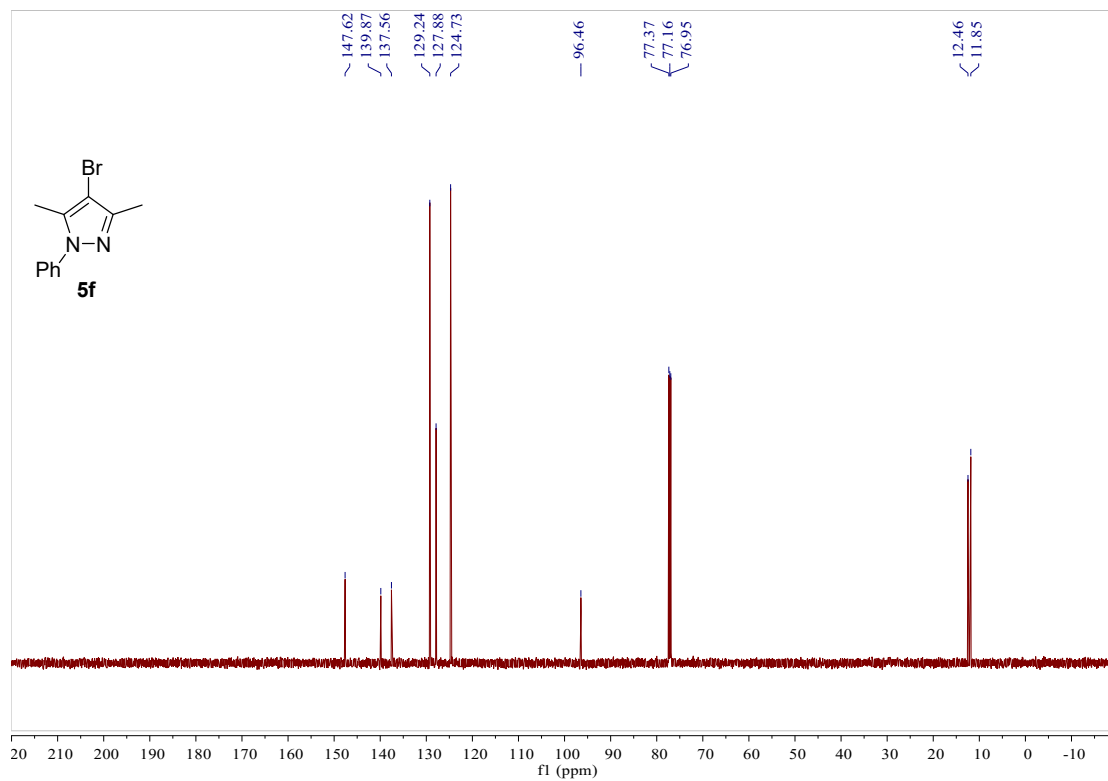



### <sup>1</sup>H NMR spectra for compound (5g)

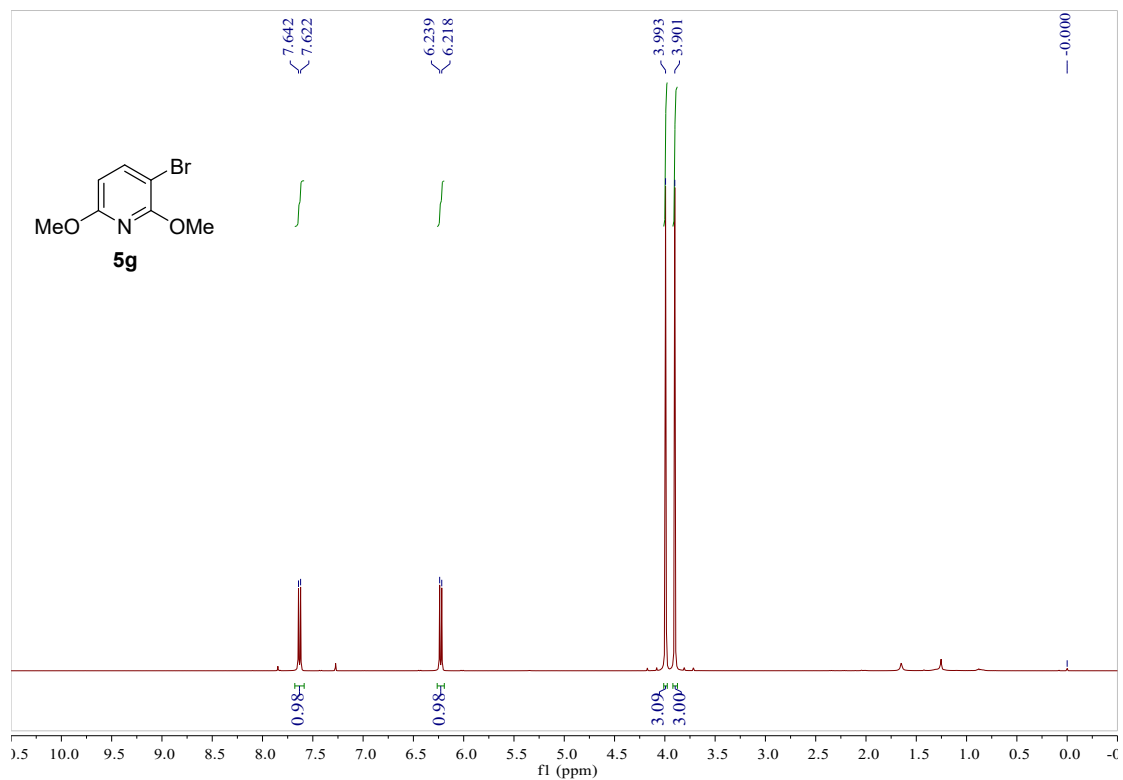

### <sup>13</sup>C NMR spectra for compound (5g)

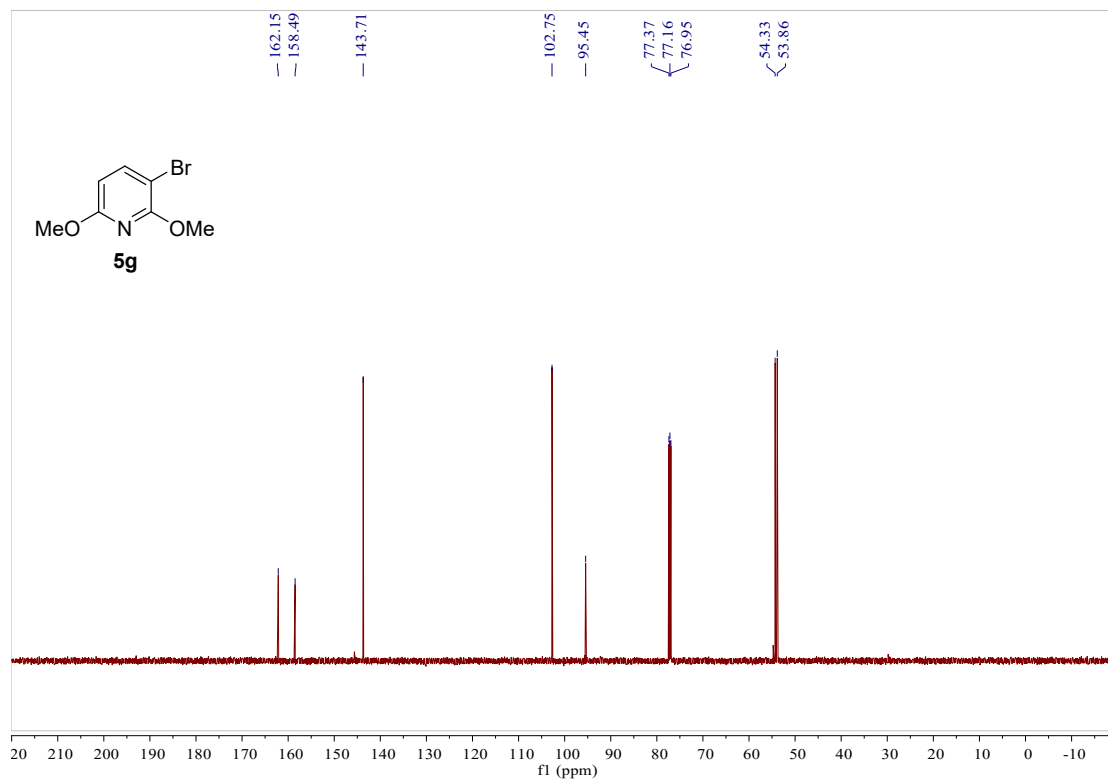

### <sup>1</sup>H NMR spectra for compound (6a)

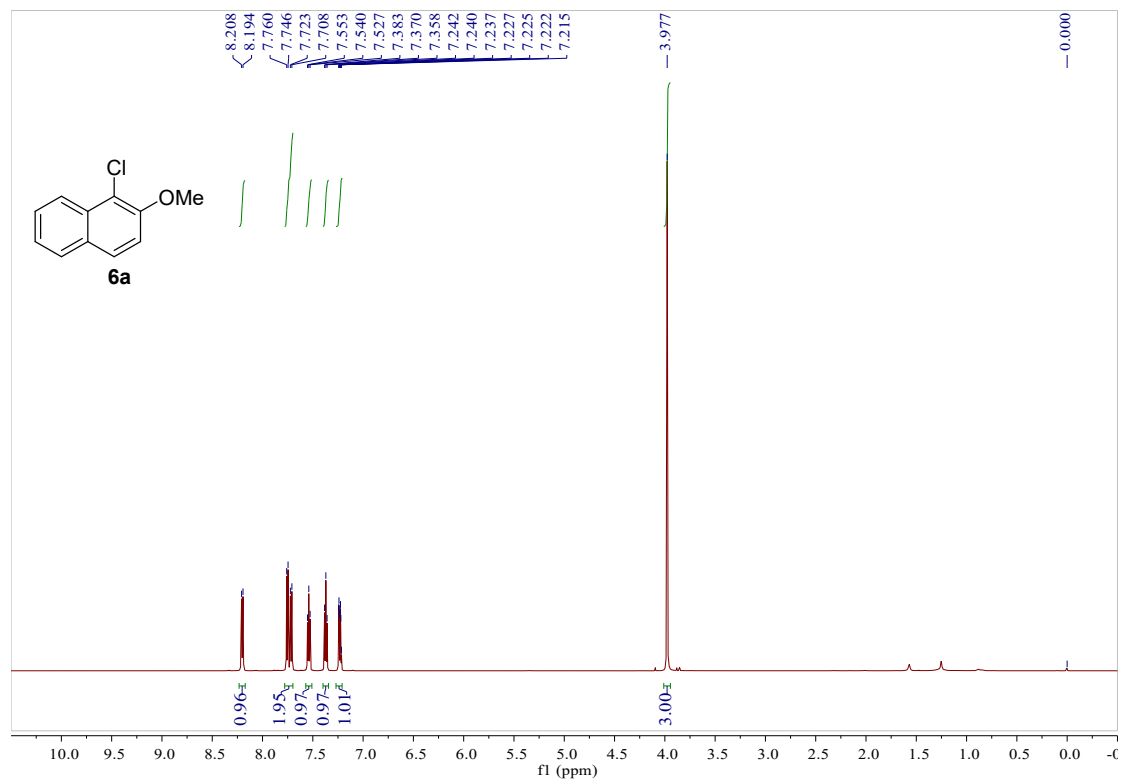

### <sup>13</sup>C NMR spectra for compound (6a)

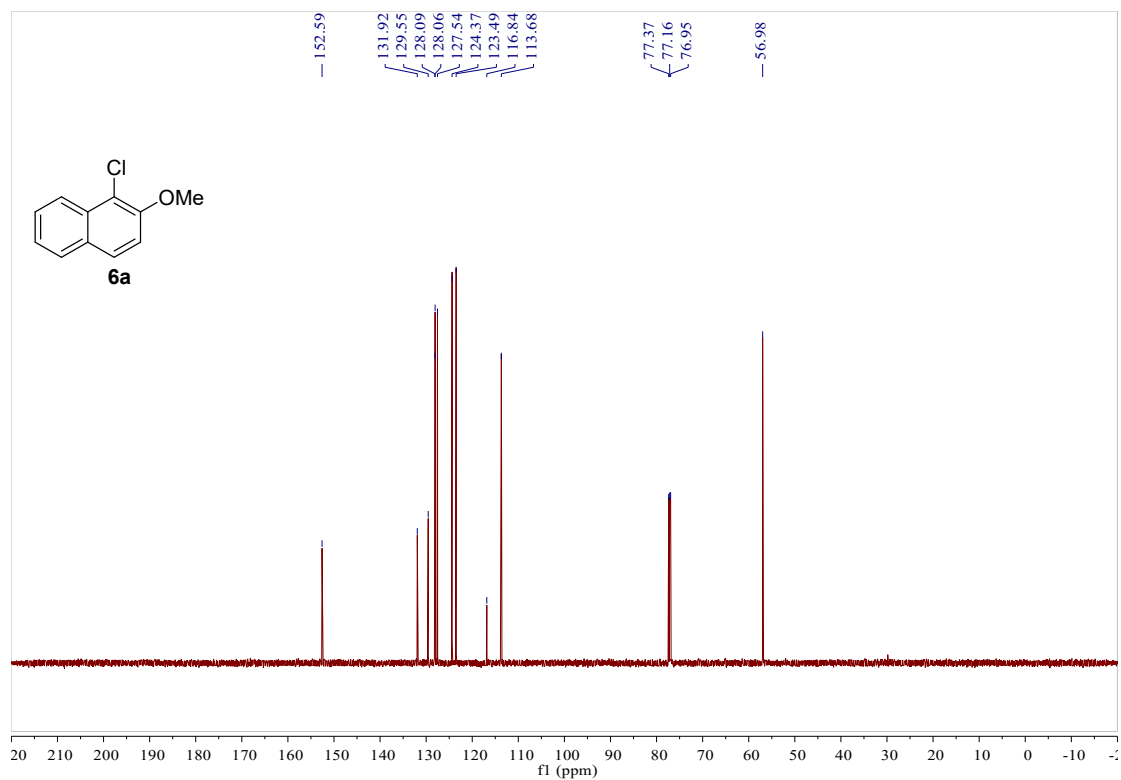

### <sup>1</sup>H NMR spectra for compound (6b)

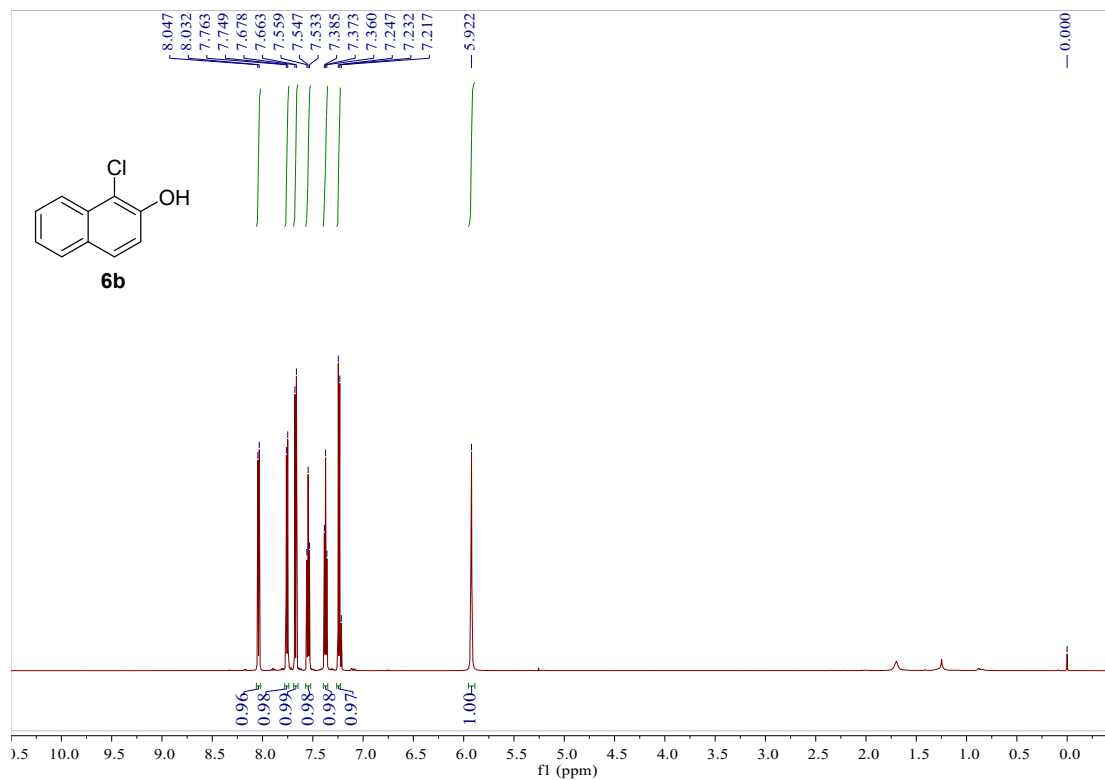

### <sup>13</sup>C NMR spectra for compound (6b)

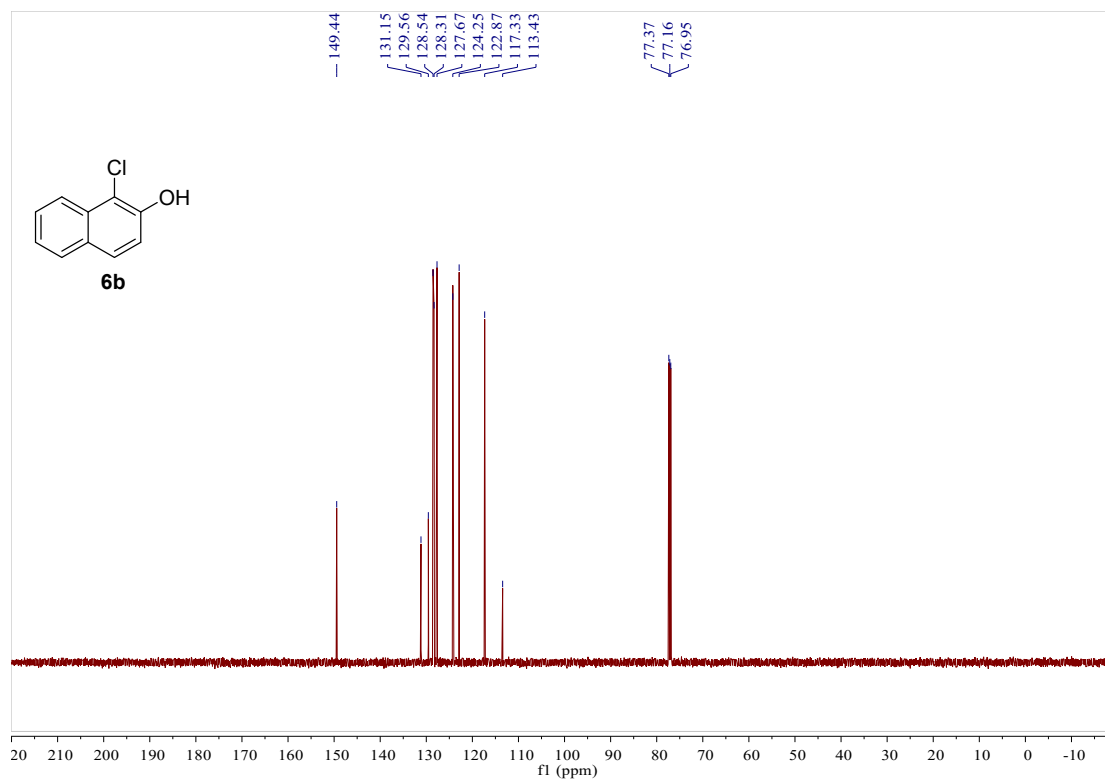

### <sup>1</sup>H NMR spectra for compound (6c)

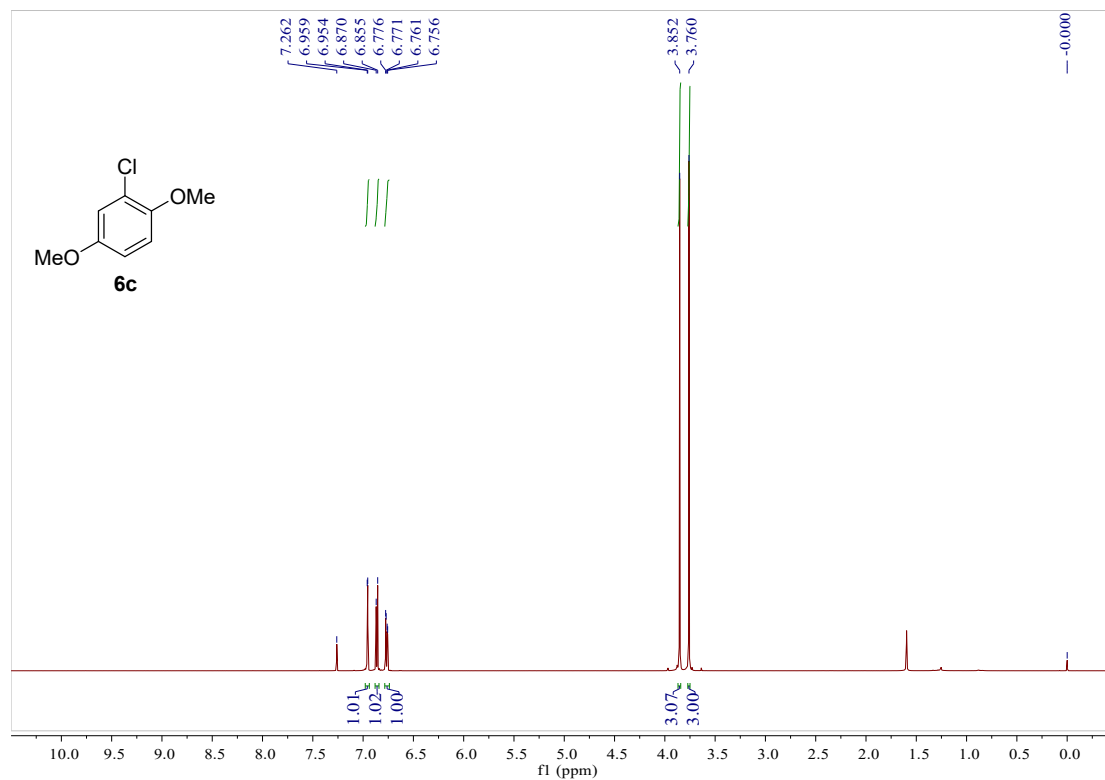

### <sup>13</sup>C NMR spectra for compound (6c)

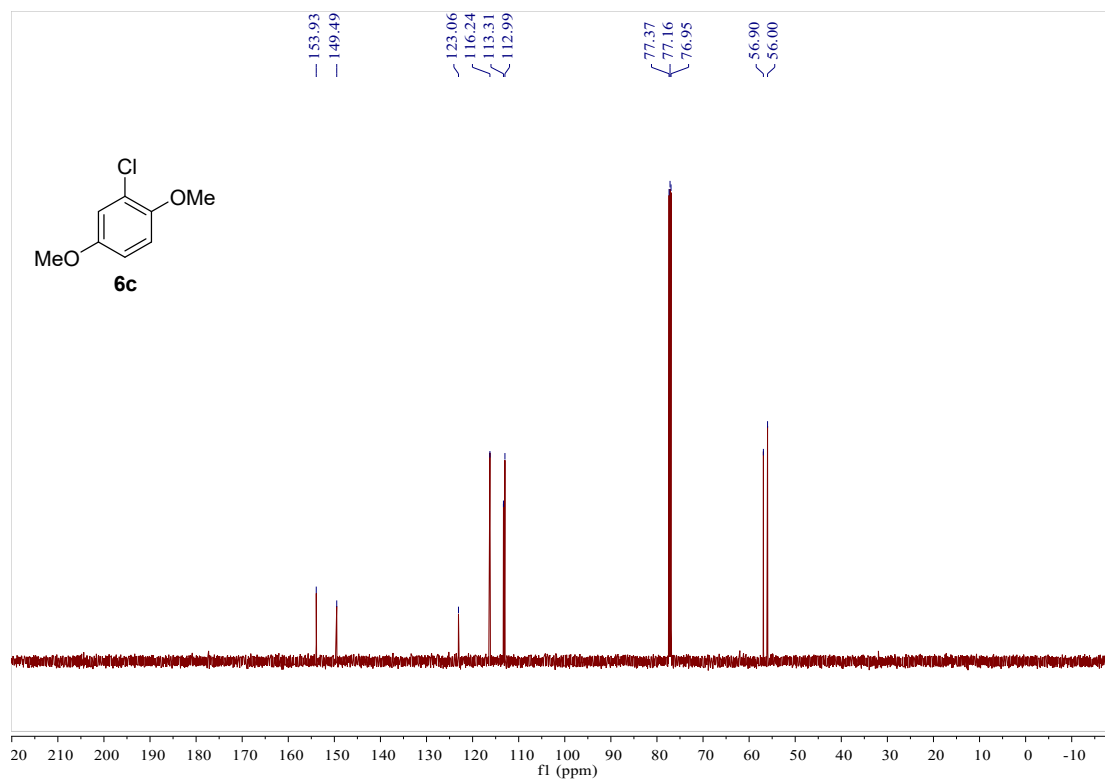

### <sup>1</sup>H NMR spectra for compound (6d)

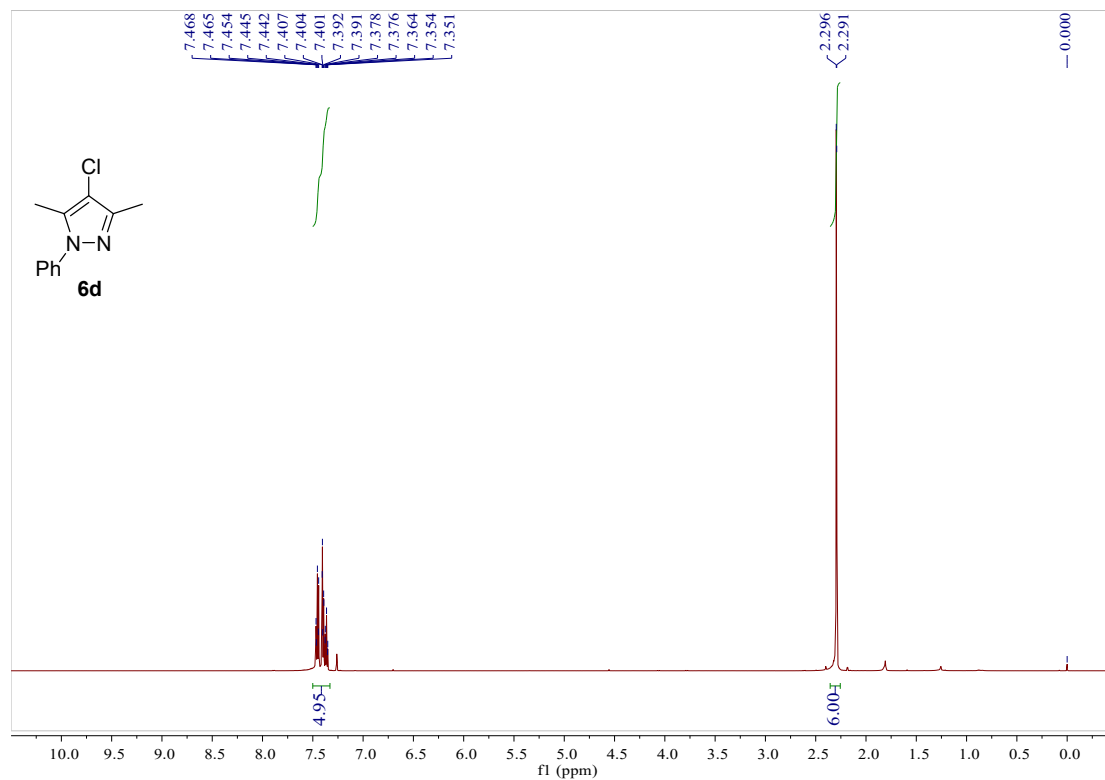

### <sup>13</sup>C NMR spectra for compound (6d)

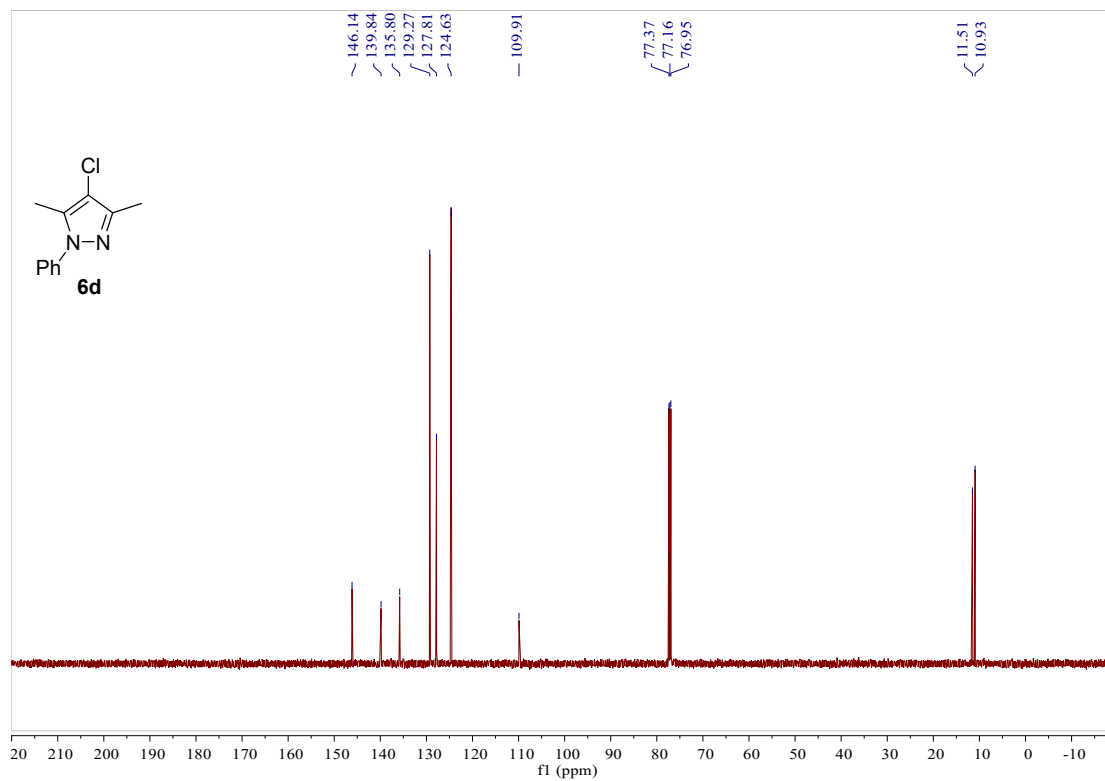

## 10. References

1. T. Kitagawa, J. Nishino, T. Inomata, T. Ozawa, Y. Funahashi and H. Masuda, *Chem. Commun.*, 2016, **52**, 4780-4783.
2. X. Wang and Y. Wu, *Chem. Commun.*, 2018, **54**, 1877-1880.
3. B. H. Lipshutz, S. Ghorai and W. W. Y. Leong, *J. Org. Chem.*, 2009, **74**, 2854-2857.
4. Y. Yuan, A. Yao, Y. Zheng, M. Gao, Z. Zhou, J. Qiao, J. Hu, B. Ye, J. Zhao, H. Wen and A. Lei, *Iscience*, 2019, **12**, 293-+.
5. R. C. Lamb and P. W. Ayers, *J. Org. Chem.*, 1962, **27**, 1441-1442.
6. B. Das, Y. Srinivas, C. Sudhakar, K. Damodar and R. Narender, *Synth. Commun.*, 2009, **39**, 220-227.
7. S. Song, X. Li, X. Sun, Y. Yuan and N. Jiao, *Green Chem.*, 2015, **17**, 3285-3289.
8. N. S. Y. Loy, S. Kim and C.-M. Park, *Org. Lett.*, 2015, **17**, 395-397.
9. K. Schuh and F. Glorius, *Synthesis-Stuttgart*, 2007, DOI: 10.1055/s-2007-983782, 2297-2306.
10. J. Xiang, R. Yuan, R. Wang, N. Yi, L. Lu, H. Zou and W. He, *J. Org. Chem.*, 2014, **79**, 11378-11382.
11. R. Banothu, S. Peraka, S. Kodumuri, D. Chevella, K. S. Gajula, V. Amrutham, D. R. Yennamaneni and N. Nama, *New J. Chem.*, 2018, **42**, 17879-17883.
12. K. Yubata and H. Matsubara, *Tetrahedron Lett.*, 2019, **60**, 1001-1004.
13. Y. Shi, Z. Ke and Y.-Y. Yeung, *Green Chem.*, 2018, **20**, 4448-4452.
14. H. A. Stefani, C. M. P. Pereira, R. B. Almeida, R. C. Braga, K. P. Guzen and R. Cella, *Tetrahedron Lett.*, 2005, **46**, 6833-6837.
15. I. Ghosh, J. Khamrai, A. Savateev, N. Shlapakov, M. Antonietti and B. Koenig, *Science*, 2019, **365**, 360-+.
16. P. D. Nahide, V. Ramadoss, K. A. Juarez-Ornelas, Y. Satkar, R. Ortiz-Alvarado, J. M. J. Cervera-Villanueva, A. J. Alonso-Castro, J. R. Zapata-Morales, M. A. Ramirez-Morales, A. J. Ruiz-Padilla, M. A. Deveze-Alvarez and C. R. Solorio-Alvarado, *Eur. J. Org. Chem.*, 2018, **2018**, 485-493.
17. A. Bose and P. Mal, *Tetrahedron Lett.*, 2014, **55**, 2154-2156.
